1 **Short title: Taxonomy, phylogeny and biogeography of African spurfowls**

2

3 **Taxonomy, phylogeny and biogeography of African spurfowls**  
4 **(Galliformes, Phasianidae, Coturnicinae, *Pternistis* spp.)**

5

6 **Tshifhiwa G. Mandiwana-Neudani<sup>1</sup>, Robin M. Little<sup>2</sup>, Timothy M. Crowe<sup>2\*</sup> and Rauri C.K.**

7 **Bowie<sup>2,3</sup>**

8

9 <sup>1</sup> Department of Biodiversity, University of Limpopo, Private Bag X1106, Sovenga 0727, South Africa

10 <sup>2</sup> FitzPatrick Institute of African Ornithology DST-NRF Centre of Excellence, Department of  
11 Biological Sciences, University of Cape Town, Private Bag X3, Rondebosch 7701, South Africa

12 <sup>3</sup> Museum of Vertebrate Zoology and Department of Integrative Biology, 3101 Valley Life Science  
13 Building, University of California, Berkeley, CA 94720-3160, USA

14

15 \*Corresponding author E-mail: [timothy.crowe@uct.ac.za](mailto:timothy.crowe@uct.ac.za) (TMC)

16

17 **Abstract**

18 During much of the 20<sup>th</sup> Century, partridge/quail-like, Afro-Asian phasianine birds referred to  
19 commonly as African spurfowls, francolins and/or partridges had a tortuous taxonomic history. Because  
20 of striking autapomorphic differences in plumage, vocalizations and ecology in some of these taxa, as  
21 many as nine genera and nearly 200 clinal and/or idiosyncratic subspecies, embedded within a  
22 polyphyletic *Perdicinae*, were recognized. In 1963, two clades, 28 ‘francolin’ and ‘spurfowl’ species  
23 (*fisante* in Afrikaans) and 13 Afro-Asiatic ‘francolins’ and ‘partridges’ (*patryse* in Afrikaans), were  
24 combined into a single genus (*Francolinus*) – the largest within the Galliformes – comprising about 100  
25 subspecies. Furthermore, *fisante* and *patryse* were partitioned into several unnamed “Groups” and four  
26 “Unplaced” species. Here, we use morphological, behavioural and DNA evidence to produce: a

27 comprehensive revision of the taxonomy and phylogeny of the *fisante* clade; a stable classification  
28 system for its component taxa; and hypotheses vis-à-vis eco-biogeographical processes that promoted  
29 their speciation and cladogenesis. We shift *Francolinus* spp. sensu stricto (members of the Spotted  
30 Group) and the Unplaced '*Francolinus*' *gularis* from the *fisante* clade to the *patryse* [discussed in  
31 Mandiwana-Neudani et al., in review]. An Unplaced *fisante*, '*F.*' *nahani*, is linked with *Ptilopachus*  
32 *petrosus* (another African endemic 'partridge') within the Odontophoridae (New World 'Quails'). We  
33 recognize 25 species of *fisante* (hereafter spurfowls), including seven with subspecies. They comprise 34  
34 terminal taxa placed within a single genus, *Pternistis*, sister to *Ammoperdix* and *Perdicula* spp., *Coturnix*  
35 'quails' and *Alectoris* 'partridges', within the now monophyletic Coturnicinae. Only one of four putative  
36 Groups of spurfowls, the Bare-throated Group, is monophyletic. The other three Groups (Montane,  
37 Scaly and Vermiculated) are para- or polyphyletic. Several species pairs of spurfowls, most notably *P.*  
38 *afer* and *cranchii*, hybridize in para/sympatry. One Bare-throated spurfowl, *P. rufopictus*, may be the  
39 product of stabilized hybridization between *P. afer* and/or *cranchii* and *P. leucoscepus*.

40

## 41 **Introduction**

42 During much of the 20<sup>th</sup> Century, there was little consensus relating to the taxonomy and phylogeny  
43 of Afro-Asian quail and partridge-like galliforms within the Phasianidae, variously commonly known  
44 as francolins, spurfowls and/or partridges. As many as nine genera [1] and nearly 200 clinal and/or  
45 idiosyncratic subspecies [2], embedded within a polyphyletic *Perdicinae* [3] were recognized. In 1963,  
46 Mrs B.P. 'Pat' Hall comprehensively revised the taxonomy of many of these taxa [2]. She argued  
47 convincingly that they should be combined within a single 'mega-genus', *Francolinus*, comprising 41  
48 species - the largest genus in the order Galliformes and the twelfth largest in Aves [4]. Thirty-six of  
49 these species are endemic to Africa, five to Asia. Hall also synonymized many subspecies, reducing  
50 the nearly 200 to just over 100 [2].

51 However, literally immediately after this 'lumping/ synonymizing' exercise, Hall divided  
52 "francolins" into two, unnamed, putatively monophyletic major clades, comprised of eight (also  
53 unnamed and putatively monophyletic) "Groups" and four "Unplaced" species [2]. The major clades

54 of francolins correspond to what Afrikaans-speakers commonly refer to as *fisante* ('pheasants') and  
 55 *patryse* ('partridges') [5, 6]. We deal with the *patryse* elsewhere [Mandiwana-Neudani et al., in  
 56 review]. Hall's *fisante* (hereafter spurfowls) included an Asiatic Spotted Group (incorporating the  
 57 nominate species *F. francolinus* and congeners), four other Groups (Vermiculated, Montane, Scaly and  
 58 Bare-throated) and two Unplaced species (*nahani* and *gularis*) [2]. Morphologically, these taxa  
 59 generally have: plain or plain-vermiculated back-plumage; brown/black/red tarsi with long –  
 60 sometimes multiple – spurs; emit raucous, grating vocalizations; and roost/perch in large bushes or  
 61 trees [6]. Members of one Group of spurfowls (the Bare-throated), differ from the others in having  
 62 bare, brightly coloured skin around the eye and/or on the throat [2].

63 Within the spurfowls, Hall [2] recognized 28 species, which are generally sexually monomorphic,  
 64 with males (and females of some taxa) of most species having at least a single (often two), long tarsal  
 65 spurs. The species differ markedly in plumage, ecology, behaviour and distributional patterns [7, 8, 9].

66  
 67 **Table 1. African spurfowl clade, groups, species, subspecies (with synonymized taxa in**  
 68 **parentheses) and 'unplaced' species recognized by Hall followed by alternative generic epithets**  
 69 **[2]. Common and scientific names are according to the IOC list [1].**

| Species Group | Common name       | Scientific names (synonymized subspecies in parentheses) abandoned generic epithets below                                                                                                                                                                                  |
|---------------|-------------------|----------------------------------------------------------------------------------------------------------------------------------------------------------------------------------------------------------------------------------------------------------------------------|
| Spotted       | Black Francolin   | <i>Francolinus francolinus</i> (Linnaeus, 1766)<br><i>francolinus</i> ( <i>caucasicus</i> , <i>sarudyni</i> ,<br><i>billypaynei</i> ), <i>arabistanicus</i> , <i>henrici</i> ( <i>festinus</i> ,<br><i>bogdanovi</i> ), <i>asiae</i> ( <i>parkerae</i> ), <i>melanotus</i> |
|               | Painted Francolin | <i>F. pictus</i> (Jardine & Selby, 1828)<br><i>pictus</i> , <i>pallidus</i> , <i>watsoni</i>                                                                                                                                                                               |

|               |                         |                                                                                                                                                                                                                                                                                                                                                                                                                                                                                                                                                                             |
|---------------|-------------------------|-----------------------------------------------------------------------------------------------------------------------------------------------------------------------------------------------------------------------------------------------------------------------------------------------------------------------------------------------------------------------------------------------------------------------------------------------------------------------------------------------------------------------------------------------------------------------------|
|               | Chinese Francolin       | <i>F. pintadeanus</i> (Scopoli, 1786)<br><i>pintadeanus</i> ( <i>wellsi</i> , <i>boineti</i> ), <i>phayrei</i>                                                                                                                                                                                                                                                                                                                                                                                                                                                              |
| Bare-throated | Red-necked Francolin    | <i>Pternistis afer</i> (Müller, 1776)<br><i>cranchii</i> ( <i>punctulate</i> , <i>nyanzae</i> , <i>manueli</i> ,<br><i>comabtela</i> , <i>mackenziei</i> ), <i>intercedens</i> ( <i>bohmi</i> ,<br><i>tornowi</i> ), <i>harterti</i><br><i>afer</i> ( <i>palliditectus</i> , <i>cunenensis</i> , <i>benguellensis</i> ,<br><i>angolensis</i> ), <i>castaneiventer</i> ( <i>krebsi</i> ), <i>notatus</i> ,<br><i>leucoparaeus</i> , <i>swynnertoni</i> , <i>humboldtii</i> ,<br><i>melanogaster</i> ( <i>itigi</i> , <i>aylwinae</i> ), <i>loangwae</i> ,<br><i>lehmanni</i> |
|               | Swainson's Francolin    | <i>P. swainsoni</i> (Smith, 1836)<br><i>swainsonii</i> , <i>lundazi</i> ( <i>chobiensis</i> ), <i>gilli</i> ,<br><i>damarensis</i>                                                                                                                                                                                                                                                                                                                                                                                                                                          |
|               | Yellow-necked Francolin | <i>P. leucoscepus</i> (Gray, 1867)<br><i>leucoscepus</i> , <i>infuscatus</i> ( <i>holtemulleri</i> ,<br><i>muhammedbenabdullah</i> , <i>keniensis</i> , <i>kilimensis</i> ,<br><i>tokora</i> , <i>oldowai</i> )                                                                                                                                                                                                                                                                                                                                                             |
|               | Grey-breasted Francolin | <i>P. rufopictus</i> Reichenow, 1887                                                                                                                                                                                                                                                                                                                                                                                                                                                                                                                                        |
| Montane       | Erckel's Francolin      | <i>P. erckelii</i> (Rüppell, 1835)                                                                                                                                                                                                                                                                                                                                                                                                                                                                                                                                          |

*erckelii, pentoni*

Djibouti Francolin *P. ochropectus* (Dorst & Jouanin, 1952)

Chestnut-naped Francolin *P. castaneicollis* Salvadori, 1888  
*castaneicollis, atrifrons, ogoensis, kaffanus*  
*(patrizii)*

Jackson's Francolin *P. jacksoni* O. Grant, 1891  
*jacksoni (gurae), pollenorum*

Handsome Francolin *P. nobilis* Reichenow, 1908  
*nobilis, chapini*

Mount Cameroon Francolin *P. camerunensis* Alexander, 1909

Swierstra's Francolin *P. swierstrai* (Roberts, 1929)  
*swierstrai (cruzi)*

Scaly Ahanta Francolin *P. ahantensis* Temminck, 1854  
*ahantensis, hopkinsoni*

Scaly Francolin *P. squamatus* Cassin, 1857  
*squamatus (whitei), schuetti (tetraoninus,*  
*zappeyi, dowashanus), maranensis*  
*(kapitensis keneinsis chyuluensis),*  
*usambarae, udzungwensis, doni*

|                                       |                                                                                                                                                                              |
|---------------------------------------|------------------------------------------------------------------------------------------------------------------------------------------------------------------------------|
| Grey-striped Francolin                | <i>P. griseostriatus</i> O. Grant, 1890                                                                                                                                      |
| Vermiculated Double-spurred Francolin | <i>P. bicalcaratus</i> (Linnaeus, 1766)<br><i>bicalcaratus (molunduensis), ayesha, adamauae, thornei, ogilviegranti</i>                                                      |
| Heuglin's Francolin                   | <i>P. icterorhynchus</i> Heuglin, 1863<br><i>icterorhynchus (grisescens), dybowskii (emini, ugandensis)</i>                                                                  |
| Clapperton's Francolin                | <i>P. clappertoni</i> (Children & Vigors, 1826)<br><i>clappertoni (voteggi, gofanus, tchadensis), gedgii (cavei), heuglini, sharpii (testis), konigseggi, nigrosquamatus</i> |
| Hildebrandt's Francolin               | <i>P. hildebrandti</i> Cabanis, 1878<br><i>hildebrandti (helleri), johnstoni (grotei, lindi), altumi</i>                                                                     |
| Natal Francolin                       | <i>P. natalensis</i> Smith, 1833<br><i>natalensis (thamnobium), neavei</i>                                                                                                   |
| Hartlaub's Francolin                  | <i>P. hartlaubi</i> Bocage, 1869<br><i>crypticus, bradfieldi (ovambensis) Chapinortyx</i>                                                                                    |
| Harwood's Francolin                   | <i>P. harwoodi</i> Blundell & Lovat, 1899                                                                                                                                    |

Red-billed Francolin      *P. adspersus* Waterhouse, 1838  
*adspersus* (*kalahari*)

Cape Francolin      *P. capensis* (Gmelin, 1789)  
*Chaetops*

Unplaced

Species

Swamp Francolin      *Ortygornis gularis* (Temminck, 1815)

Nahan's Francolin      *Ptilopachus nahani* (Dubois, 1905)  
*Acentrortyx*

70  
71

72      Hall's [2] revision was adopted in many subsequent taxonomic and regional treatments of  
73 Galliformes [7, 8, 10, 11]. Nevertheless, other treatments assigned generic status to some of her  
74 spurfowl groups and subsets thereof. For example, with regard to African spurfwowls, Roberts [12, 13]  
75 restricted *Pternistis* to Hall's Bare-throated Group, and assigned three of her Vermiculated species  
76 (*capensis*, *natalensis* and *adspersus*) and a fourth (*hartlaubi*) to separate genera, *Chaetops* and  
77 *Chapinortyx* respectively. In sharp contrast, Wolters [14] lumped members of her Vermiculated,  
78 Montane, Scaly and Bare-throated Groups into a much enlarged *Pternistis*.

79      Post-Hall' analyses of francolin/spurfowl syringeal morphology [15], chick plumage [2, 9, 16],  
80 vocalizations [17, 18] and DNA [19, 20] decisively reject a sister relationship between Hall's two  
81 clades of 'francolins' [*sensu* 2]. A consensus from the above studies is to recommend phylogenetically  
82 placing somewhat modified versions of the Hall francolin and spurfowl taxa within two evolutionarily  
83 distantly related phasianine lineages, aligned with the now monophyletic Gallinae and Coturnicinae  
84 [20].

85 For example, the Asiatic Spotted Group (*Francolinus* spp. sensu stricto) and the Swamp Francolin  
86 ‘*F. gularis*’ should be removed from the spurfowls and placed within the francolin/*patryse* clade [20],  
87 with Spotted/*Francolinus* spp. placed as basal within this clade, and *gularis* with Hall’s unplaced ‘*F.*’  
88 *pondicerianus* with some of Hall’s Striated taxa (e.g. *sephaena*) [20]. The enlarged ‘true’ francolin  
89 assemblage is, in turn, sister to *Gallus* and *Bambusicola* spp. within the Gallinae [20]. Nahan’s  
90 ‘Francolin’ [21] should also be removed from the spurfowl clade and placed outside francolins sensu  
91 Hall as sister to another phylogenetically enigmatic African ‘partridge’, *Ptilopachus petrosus* [22].  
92 These now congeneric *Ptilopachus* spp. (Ptilopachinae) are sister to New World ‘quails’  
93 (Odontophorinae) [23]. African spurfowls (Hall’s spurfowls minus *Francolinus* spp. sensu stricto, ‘*F.*’  
94 *nahani* and *gularis*) are sister to *Ammoperdix* and *Perdicula* spp., *Coturnix* ‘quails’ and *Alectoris*  
95 ‘partridges’, within the now monophyletic Coturnicinae [20].

96 In the present study, we deal with the remaining African spurfowls: Hall’s Montane, Scaly,  
97 Vermiculated and Bare-throated Groups [2]. We use more modern species [24] and subspecies [25]  
98 concepts and phylogenetic methods to reassess Hall’s and others’ taxonomic, phylogenetic and  
99 biogeographical findings.

100

## 101 **Materials and methods**

### 102 **Taxon sampling**

103 Taxa and specimens studied herein (Appendix 1) include all putative African spurfowl species, the  
104 vast majority of putative subspecies and all specimens examined by Hall [2] at The Natural History  
105 Museum (Tring, UK), supplemented by a broader array of material from other major natural history  
106 museums mentioned in the Acknowledgements. Where possible, at least 10 specimens for each  
107 putative taxon were examined.

### 108 **Taxonomy**

109 Taxonomy involves the discovery, description, naming and classification of taxa at all levels of the  
110 evolutionary hierarchy. Generally, however, it focuses on the fundamental (terminal) components of



111 biodiversity, which are traditionally species and subspecies [24, 25]. Great emphasis has previously  
112 been placed on the relative merits of different ‘species concepts’ with less emphasis on the linked  
113 processes through which species are determined [26].

114 Empirically, we view species as reciprocally monophyletic groups of specimens that are  
115 qualitatively similar in terms of suites of diagnostic, consilient characters (from e.g. morphology,  
116 vocalizations and DNA markers); and geographically ‘meaningfully’ distributed (e.g. in relation to  
117 past/present vegetation types and/or topography, and well-established biogeographical  
118 provinces/regions [27]).

119 Our goal is to identify evolutionarily independent lineages buffered from the homogenizing effects  
120 of tokogeny [28]. This is important for spurfowls since hybridization between putative species taxa is  
121 thought to be common [29].

122 Subspecies are groups of populations delineated by geographically steep, congruent clinal variation  
123 in multiple characters where their distributional ranges meet. The zones of parapatry (distributional  
124 overlap) are characterized by morphologically intermediate individuals or individuals with ‘shuffled’,  
125 undiagnosable sets of characters that appear to reflect hybridization between the largely allopatric  
126 populations. Thus, our goal for subspecies is for them to reflect a common phylogeographic genealogy  
127 characterized by consilient, potentially adaptive, anatomical, behavioural and ecological differences  
128 maintained by constrained interbreeding between taxa. Subspecies in one clade may have  
129 geographically similar distributions to those in other clades comprised of much more well-marked  
130 evolutionarily significant units [30] and full species. Ultimately, one has to draw the taxonomic line  
131 somewhere, with the goal of finding meaningful evolutionary entities. When in doubt, we recognize  
132 terminal taxa as subspecies.

133 A good example of the application of the multifaceted consilient approach is the southern African  
134 Black Korhaan (*Eupodotis afra/afraoides*). This taxon was treated as a subspecies pair by avian  
135 taxonomists until it was demonstrated that the two taxa were diagnosable as ‘good’ species through a  
136 series of consilient evolution of morphological, molecular, vocal, life history and habitat characters;

137 despite evidence of a narrow hybrid zone [31]. Indeed, hybridization, particularly in birds, can still  
138 occur even long after speciation [32, 33].

139 In sharp contrast, 27 putative species/subspecies of Helmeted Guineafowl in the genus *Numida*  
140 were combined into a single polytypic species (*meleagris*) with nine subspecies [34]. Subspecies were  
141 recognized by high, but imperfect, character consilience, and were connected by narrow to broad zones  
142 of 'hybridization' between parapatric entities between which there are no discernible differences in  
143 courtship behaviour, vocalizations and ecology throughout the entire range of this polytypic species.

144 Reflecting elements of both the above studies, the sunbird *Cinnyris whytei* of the Malawi highlands  
145 was split from the Angolan *C. ludovicensis* [35] due to clear morphological, genetic and distributional  
146 differences. But, it was also necessary to describe a newly discovered population of *C. whytei* from  
147 Tanzania as a subspecies of *C. whytei* (*C. w. skye*), due to the presence of only minor morphological  
148 differences and multi-locus coalescent analyses not being able to exclude the possibility of recurrent  
149 gene flow between *whytei* and *skye*. Both examples illustrate the multifaceted consilience approach we  
150 adopt, and more generally reflect the view that species are separately evolving metapopulation lineages  
151 [26].

152  
153 In practice within this study, the decision to rank a taxon as a species was made using a consilience  
154 framework where entities were:

- 155 1. morpho-behaviourally diagnosable (as defined above) and  $\geq$  to 2% difference in unweighted,  
156 uncorrected, overall, molecular sequence divergence of mitochondrial DNA [19];
- 157 2. reciprocally monophyletic using morpho-behavioural and molecular characters [24]; and
- 158 3. were primarily restricted to a commonly accepted biogeographical region or subsection thereof  
159 [27].

## 160 **Morpho-behavioural characters**

161 The basic body plan of study skins was divided into discrete sections (Fig 1) and scored for  
162 variation in colour and patterning: 33 organismal characters reflecting assessment of  
163 plumage/integument colour/pattern, measurements of study skins, and vocal characters (Table 2).

164 Measurements (bill length from cere, wing/tail/tarsus/spur length) were taken using a Vernier Calliper  
 165 or a wing rule.

166

167 **Fig 1. Spurfowl body parts scored when generating plumage characters.** C = crown, HN = hind  
 168 neck, LN = lower neck, B= back, UPTC = upper tail coverts, T = throat, G = throat patch, BR = breast,  
 169 BE = belly, UNTC = under tail coverts, SOH = side of the head, W = wing.

170

171 **Table 2. Thirty-three morpho-behavioural characters with scoring criteria used for the**  
 172 **phylogenetic analyses of spurfowls.**

|        | Characters            | Character scores                                                                                  |
|--------|-----------------------|---------------------------------------------------------------------------------------------------|
| 1.     | Crown margins         | unmargined = 0; grey = 1; buff = 2; grey brown = 3                                                |
| 2      | Nares                 | black = 1; chestnut = 2; grey brown = 3; buff or white = 4; white = 5                             |
| 3      | Hind neck patterning  | unpatterned = 0; mottled = 1; streaked = 2                                                        |
| 4      | Hind neck base colour | grey brown = 1; grey black = 2; grey chestnut = 3; rufous brown = 4; black = 5                    |
| 5      | Hind neck margins     | unmargined = 0; grey = 1; buff = 2; grey brown = 3                                                |
| 6      | Lower neck patterning | streaked = 1; mottled = 2; barred = 3                                                             |
| 7-10.  | Back plumage          | plain = 0; streaked = 1 (7); mottled = 1 (8); vermiculated = 1 (9);<br>barred = 1 (10)            |
| 11-13. | Upper tail coverts    | plain = 0; barred = 1 (11); vermiculated = 1 (12); streaked = 1 (13)                              |
| 14.    | Throat                | feathered = 1; yellow skin = 2; orange skin = 3; red skin = 4                                     |
| 15-18. | Under tail coverts    | plain = 0; barred = 1 (15); streaked = 1 (16); vermiculated = 1 (17);<br>mottled = 1 (18)         |
| 19.    | Bare skin around eye  | none = 0; red = 1; yellow = 2                                                                     |
| 20.    | Leg colour            | yellow = 1; red = 2; orange red = 3; orange = 4; olive green = 5;<br>orange yellow = 6; black = 7 |

|        |                                         |                                                |
|--------|-----------------------------------------|------------------------------------------------|
| 21.    | Number of spurs                         | one = 1; two = 2                               |
| 22.    | Wing length (mm)<br>males               | < 160 = 1; 160–180 = 2; 181–200 = 3; > 200 = 4 |
| 23.    | Culmen length / Wing<br>length (mm)     | < 0.16 = 1; 0.17–0.2 = 2; > 0.2 = 3            |
| 24.    | Tail length / Wing<br>length (mm)       | < 0.54 = 1; > 0.54 = 2                         |
| 25.    | Sexual dimorphism<br>(plumage)          | absent = 0; present = 1                        |
| 26.    | Sexual dimorphism<br>(wing length)      | ♀ > 0.9 of ♂ = 0; ♀ < 0.9 of ♂ = 1             |
| 27.    | Vocalisation strophe<br>duration (secs) | < 0.3 = 1; 0.3–0.6 = 2; > 0.6 = 3              |
| 28.    | Number of elements                      | one = 1; two = 2; > 2 = 3                      |
| 29.    | Inter element interval                  | absent or indistinct = 1; distinct = 2         |
| 30.    | Cackle trill                            | absent = 0; present = 1                        |
| 31-32. | Strophe character                       | tonal = 0 (31); trill = 1 (32)                 |
| 33.    | ‘Ko-waaark’<br>advertisement call       | absent = 0; present = 1                        |

173

## 174 **Molecular characters and samples**

175 For within-group molecular analyses of spurfowls, 51 putative terminal taxa were studied (Table 3)  
176 with respect to four mitochondrial markers: Cytochrome *b* (CYTB - 1143 base pairs), Control region  
177 (CR - 820 bp), NADH dehydrogenase subunit 2 (ND2 - 1041 bp) and 12S rRNA (12S - 706 bp); three  
178 nuclear DNA markers: Ovomuroid G (OVO-G - 449 bp), Glyceraldehyde-3-phosphodehydrogenase  
179 (GAPDH – 361 bp) and Trans Globulin Growth Factor Beta2 intron-5 (TGFB - 596 bp) (Appendix 1).

180

181 **Table 3. Sample information for spurfowl taxa recognized by Hall [2] for which DNA sequences**  
 182 **were generated.** Acronyms; AMNH = American Museum of Natural History, FHMM = French  
 183 Natural History Museum, TM = Transvaal Museum - Ditsong National Museum of Natural History,  
 184 BM = British Museum - Natural History Museum at Tring, SAM = Iziko Museums of Cape Town  
 185 (Natural History), FIAO = FitzPatrick Institute of African Ornithology, TMC = Timothy M. Crowe,  
 186 University of Cape Town, South Africa, GB = GenBank, Br. muscle = Breast muscle. Generic  
 187 terminology follows that generated in this study.

| Taxa                        | Sample number    | Origin                       | Date collected | Sample type |
|-----------------------------|------------------|------------------------------|----------------|-------------|
| Bare-throated Group         |                  |                              |                |             |
| <i>F. afer</i>              | PFIAO 108        | Tudor East,<br>Watervalboven | 2004           | Liver       |
| <i>F. a. benguellensis</i>  | AMNH 267682      | Mombola                      |                | Toe pad     |
| <i>F. a. harterti</i>       | AMNH 541485      | Russisi River                |                | Toe pad     |
| <i>F. a. nudicollis</i>     | BM 1903.10.14.91 | E. Transvaal                 | 1903           | Toe pad     |
| <i>F. a. böhmi</i>          | BM 1932.5.10.214 | S. Tanganyika                | 1932           | Toe pad     |
| <i>F. a. cunenensis</i>     | TM 28584         | Cunene River                 | 1957           | Toe pad     |
| <i>F. humboldtii</i>        | TM 20341         | Selindu, Mabsettler          | 1935           | Toe pad     |
| <i>swynnertoni</i>          |                  |                              |                |             |
| <i>F. cranchii cranchii</i> | BM 1953.54.56    | Mwinilunga, N.<br>Rhodesia   | 1953           | Toe pad     |
| <i>F. c. itigi</i>          | AMNH 202502      | Poona Singida                |                | Toe pad     |
| <i>F. c. intercedens</i>    | AMNH 416180      | Tukuyu                       |                | Toe pad     |
| <i>F. c. nyanzae</i>        | AMNH211906       | Buhumbiro                    |                | Toe pad     |
| <i>F. swainsonii</i>        | TMC 40           | Marico River                 | 2004           | Liver       |
| <i>F. s. lundazi</i>        | SAM 2055756a     | Deka                         | 1969           | Toe pad     |
| <i>F. s. chobiensis</i>     | SAM 2003501      | Victoria falls               | 1904           | Toe pad     |

|                                       |                |                               |      |          |
|---------------------------------------|----------------|-------------------------------|------|----------|
| <i>F. rufopictus</i>                  | AMNH 202503    | Gagayo, Muranza               |      | Toe pad  |
| <i>F. leucoscepus</i>                 | PFIAO 109      | Kenya-                        | 2004 | Heart    |
| <i>F. l. infuscatus</i>               | AMNH 419169    | Tana River, Kenya             |      | Toe pad  |
| <i>F. l. muhamed-<br/>benabdullah</i> | AMNH 541581    |                               |      | Toe pad  |
| Montane Group                         |                |                               |      |          |
| <i>F. erckelii</i>                    | AMNH 541471    | Badaltino, Shoa               |      | Toe pad  |
| <i>F. erckelii</i>                    | AMNH DOT11039  | Ethiopia                      |      | Liver    |
| <i>F. ochropectus</i>                 | FNHM 1971-1072 | Djibouti                      |      | Toe pad  |
| <i>F. castaneicollis</i>              | GB             |                               |      | Toe pad  |
| <i>F. c. bottegi</i>                  | AMNH541435     | Rafissa, Abyssinia            |      | Toe pad  |
| <i>F. c. ogoensis</i>                 | AMNH541426     | Lower Sheikh                  |      | Toe pad  |
| <i>F. jacksoni</i>                    | AMNH261929     | East slope, Mt. Kenya         |      | Toe pad  |
| <i>F. nobilis</i>                     | AMNH1759       | West Ruwenzori                |      | Toe pad  |
| <i>F. camerunensis</i>                | TMC 42         | Mount Cameroon                |      | Liver    |
| <i>F. swierstrai</i>                  | AMNH 419126    | Angola                        |      | Toe pad  |
| <i>F. swierstrai</i>                  | TMC 67         | Angola, 14.49S 13.23E         | 2010 | Blood    |
| Scaly Group                           |                |                               |      |          |
| <i>F. ahantensis</i>                  | AMNH 541409    | Nr York Pass, Sierra<br>Leone |      | Toe pad  |
| <i>F. squamatus</i>                   | PFIAO 117      |                               |      | Tot. DNA |
| <i>F. s. maranensis</i>               | AMNH 541407    | Kilimanjaro district          |      | Toe pad  |
| <i>F. s. schuetti</i>                 | AMNH 763912    | Tshibati, D. R. Congo         |      | Toe pad  |
| <i>F. griseostriatus</i>              | AMNH 541411    | Ndalla Tanda                  |      | Toe pad  |
| Vermiculated Group                    |                |                               |      |          |
| <i>F. bicalcaratus</i>                | TM 14682       | Gold Coast, Hinterland        | 1901 | Toe pad  |
| <i>F. b. ayesha</i>                   | AMNH 541250    | Forest of Mamora              |      | Toe pad  |

|                             |                 |                               |      |            |
|-----------------------------|-----------------|-------------------------------|------|------------|
| <i>F. b. thornei</i>        | AMNH 541280     | Kavene, Sierra Leone          |      | Toe pad    |
| <i>F. b. adamauae</i>       | AMNH 704359     | Cameroon                      |      | Toe pad    |
| <i>F. clappertoni</i>       | AMNH 541305     | Takoukout, Cameroon           |      | Toe pad    |
| <i>F. clappertoni</i>       | TMC 68          | Cameroon                      | 2005 | Br. Muscle |
| <i>F. c. sharpie</i>        | AMNH 541324     | Adarte                        |      | Toe pad    |
| <i>F. c. nigrosquamatus</i> | AMNH 541341     | S. Ethiopia                   |      | Toe pad    |
| <i>F. icterorhynchus</i>    | AMNH 156922     | Fanadji                       |      | Toe pad    |
| <i>F. hildebrandti</i>      | GB              |                               |      | Blood      |
| <i>F. h. altumi</i>         | AMNH 551345     | Gilgil River                  |      | Toe pad    |
| <i>F. h. fischeri</i>       | AMNH 261945     | N. Tanganyika Territory       |      | Toe pad    |
| <i>F. h. johnstoni</i>      | AMNH 347277     | Mafinga Mt., N.<br>Rhodesia   |      | Toe pad    |
| <i>F. h. helleri</i>        | AMNH 207771     | Neng                          |      | Toe pad    |
| <i>F. natalensis</i>        | TMC 120         | Marico River, South<br>Africa | 2004 | Liver      |
| <i>F. hartlaubi</i>         | TMC 121         | Namibia                       | 2006 | Br. Muscle |
| <i>F. h. crypticus</i>      | AMNH 703654     | Erungu Plateau                |      | Toe pad    |
| <i>F. capensis</i>          | PFIAO 229       | Kakamas, South Africa         |      | Heart      |
| <i>F. adspersus</i>         | PFIAO 206A      |                               |      | Liver      |
| <i>F. harwoodi</i>          | BM 1927.11.5.18 |                               | 1927 | Toe pad    |

188

189 Primers used in sequencing are listed in Tables 4 and 5. The 1143 bp long CYTB was sequenced for  
 190 all taxa included in this study while data for the other markers may be missing for some taxa. Contrary  
 191 to earlier work [19, 36] which focused on few species, all putative species and most subspecies  
 192 attributed to African spurfowls were included (Appendix 1). Some 72% of specimens sequenced in  
 193 this study derived from DNA extractions of toe-pad scrapes off museum skins. As a result, only CYTB  
 194 was sequenced for both fresh and historical tissues and the other six markers were sequenced for

195 species for which there were fresh tissues. Due to the fragmented nature of the historical sourced  
 196 DNA, the CYTB gene for the toe-pads was sequenced in multiple fragments (six for each sample)  
 197 using spurfowl-specific primers (Table 5).

198

199 **Table 4. DNA markers sequenced and primers used for PCR-amplification and sequencing of**  
 200 **preserved tissues.**

| Primer name                        | Primer sequence (5' to 3')          | References                                |
|------------------------------------|-------------------------------------|-------------------------------------------|
| Cytochrome <i>b</i>                |                                     |                                           |
| L14578                             | cat gga atc atc cta gcc cta ga      | J.G. Groth (personal commun.)             |
| MH15364                            | act cta cta ggg ttg gcc c           | P. Beresford (personal commun.)           |
| ML15347                            | atc aca aac cta ttc tc              | P. Beresford (personal commun.)           |
| H15915                             | aac gca gtc atc tcc ggt tta caa gac | Edwards & Wilson [37]                     |
| Control region                     |                                     |                                           |
| PHDL                               | agg act acg gct tga aaa gc          | Fumihito et al. [38]                      |
| PH-H521                            | tta tgt gct tga ccg agg aac cag     | E.A. Scott (personal commun.)             |
| PH-L400                            | att tat tga tgg tcc acc tca cg      | E.A. Scott (personal commun.)             |
| PHDH                               | cat ctt ggc atc ttc agt gcc         | Fumihito et al. [38]                      |
| 12S rRNA                           |                                     |                                           |
| L1267                              | aaa gca tgg cac tga ag(atc) tg      | Moum et al. [39]                          |
| H2294                              | gtg cac ctt ccg gta cac ttac c      | O. Haddrath (S. Pereira personal commun.) |
| NADH dehydrogenase subunit 2 (ND2) |                                     |                                           |
| L5216                              | gcc cat acc ccr aaa atg             | Sorenson et al. [40]                      |
| H6313                              | ctc tta ttt aag gct ttg aag gc      | Sorenson et al. [40]                      |
| Ovomucoid G                        |                                     |                                           |
| OVO-G Forward                      | caa gac ata cgg caa caa rtg         | Armstrong et al. [41]                     |
| OVO-G Reverse                      | ggc tta aag tga gag tcc crt t       | Armstrong et al. [41]                     |



GAPDH intron-11

GapdL890 acc ttt aat gcg ggt gct ggc att gc Friesen et al. [42]

GapdH950 cat caa gtc cac aac acg gtt gct gta Friesen et al. [42]

Tran Globulin Growth Factor Beta2 intron-5

TGFb2-5F ttg tta ccc tcc tac aga ctt gag tc Primmer et al. [43]

TGFb2-6R gac gca ggc agc aat tat cc Primmer et al. [43]

201

202

203 **Table 5. DNA markers sequenced and primers used for PCR-amplification and sequencing of**  
 204 **museum toe pads.**

| Primer name               | Primer sequence (5' to 3')      | References                      |
|---------------------------|---------------------------------|---------------------------------|
| <i>Cytochrome b</i>       |                                 |                                 |
| Spurfowl-specific primers |                                 |                                 |
| L14851 (General)          | cct act tag gat cat tgg ccc t   | Kornegay et al. [44]            |
| Pt-H195                   | ttt cgr cat gtg tgg gta cgg ag  | R. Moyle & T. Mandiwana-Neudani |
| Pt-H194                   | cat gtr tgg gct acg gag g       | R. Bowie                        |
| MH15145                   | aag aat gag gcg cca ttt gc      | P. Beresford                    |
| Pt-L143                   | gcc tca tta ccc aaa tcc tca c   | R. Moyle & T. Mandiwana-Neudani |
| Pt-H361                   | gtg gct att agt gtg agg ag      | R. Moyle & T. Mandiwana-Neudani |
| Pt-L330                   | tat act atg gct cct acc tgt ac  | R. Bowie                        |
| Pt-H645                   | ggg tgg aat ggg att ttg tca gag | R. Moyle & T. Mandiwana-Neudani |
| Pt-L633                   | ggc tca aac aac cca cta ggc     | R. Moyle & T. Mandiwana-Neudani |
| Pt-H901                   | agg aag ggg att agg agt agg at  | R. Moyle & T. Mandiwana-Neudani |

|                |                                     |                                 |
|----------------|-------------------------------------|---------------------------------|
| L2-2312        | cat tcc acg aat cag gct c           | R. Bowie                        |
| H15696         | aat agg aag tat cat tcg ggt ttg atg | Edwards et al. [45]             |
| Pt-L851alt     | cct att tgc cta cgc cat cct ac      | R. Bowie                        |
| Pt-H1050       | gat gct gtt tgg ccg atg             | R. Bowie                        |
| Pt-L961        | cga acc ata aca ttc cca c           | R. Moyle & T. Mandiwana-Neudani |
| Pt-L961alt     | ctc atc cta ctc cta atc ccc         | R. Bowie                        |
| HB20 (General) | ttg gtt cac aag acc aat gtt         | J. Feinstein (personal commun.) |

205

206

207

## Phylogenetic methods

208

209

210

211

212

213

214

215

Taxa were placed phylogenetically, following the principle of character consilience to reflect progressively more inclusive reciprocally monophyletic groupings [46]. Qualitative morpho-behavioural characters (morphology, behaviour, life history) were analyzed in combination with DNA sequence characters, in a ‘total evidence’ phylogenetic analysis. This approach was chosen because combined data sets may show clade support and resolution that is ‘hidden’ by separate analysis of character partitions. For instance, when data are concatenated, different types of characters that evolve at somewhat different rates may ‘click in’ at different levels of phylogeny [i.e. deep, shallow and intermediate nodes; 47, 48].

216

217

218

219

Parsimony was employed as the optimality criterion for the combined DNA and morpho-behavioural character analyses [49]. Indeed, the meta-analysis of more than 500 articles using model- and parsimony-based methods found strongly supported topological incongruence in only two of the studies examined [50].

220 All the data matrices were rooted on *Perdicula asiatica* and *Ammoperdix heyi* following [4]. For  
221 inter-taxon genetic distances, uncorrected pairwise distances were calculated in PAUP ver. 4.0b10 and  
222 were transformed into percentages.

223

## 224 **Distributional range maps**

225 Another challenging and indispensable aspect in the analyses outlined below was to produce maps  
226 showing the distributional ranges of the various spurfowl taxa ultimately recognized. In Step 1 in  
227 developing the range (as opposed to point locality) maps for each taxon that emerged, the ‘Atlas of  
228 Speciation in African Non-passerine Birds’ [51] was used since it still presents the best distribution  
229 ranges of species produced from the point localities of the specimens collected. This was  
230 supplemented in Step 2 - consulting the ‘Atlas of Southern African Birds’ [52] which was helpful in  
231 filling distribution gaps for southern African species. Step 3 involved using Hall’s inferred  
232 distributions [2] to complete the ranges of species and subspecies recognized.

233

## 234 **Results**

### 235 **Morpho-behavioural characters**

236 Character information for morpho-behavioural characters are presented in Table 6.

237

**Table 6. Morpho-behavioural character scores matrix used for the phylogenetic analysis of spurfowls.**

| Taxon                 | Character reference numbers (see Table 4). |   |   |   |   |   |   |   |   |   |   |   |   |   |   |   |   |   |   |   |   |   |   |   |   |   |   |   |   |   |   |   |   |
|-----------------------|--------------------------------------------|---|---|---|---|---|---|---|---|---|---|---|---|---|---|---|---|---|---|---|---|---|---|---|---|---|---|---|---|---|---|---|---|
|                       | 1                                          | 2 | 3 | 4 | 5 | 6 | 7 | 8 | 9 | 0 | 1 | 2 | 3 | 4 | 5 | 6 | 7 | 8 | 9 | 0 | 1 | 2 | 3 | 4 | 5 | 6 | 7 | 8 | 9 | 0 | 1 | 2 | 3 |
| <i>Pternistis</i>     |                                            |   |   |   |   |   |   |   |   |   |   |   |   |   |   |   |   |   |   |   |   |   |   |   |   |   |   |   |   |   |   |   |   |
| <i>hartlaubi</i>      | 0                                          | 1 | 1 | 1 | 0 | 1 | 1 | 1 | 0 | 0 | 1 | 1 | 0 | 1 | 1 | 0 | 0 | 0 | 0 | 1 | 2 | 1 | 3 | 2 | 1 | 0 | 3 | 3 | 2 | 0 | 1 | 1 | 0 |
| <i>P.</i>             |                                            |   |   |   |   |   |   |   |   |   |   |   |   |   |   |   |   |   |   |   |   |   |   |   |   |   |   |   |   |   |   |   |   |
| <i>camerunensis</i>   | 0                                          | 1 | 1 | 2 | 0 | 2 | 0 | 1 | 1 | 0 | 1 | 1 | 0 | 1 | 1 | 0 | 0 | 0 | 1 | 2 | 2 | 2 | 1 | 1 | 1 | 0 | 2 | 2 | 2 | 0 | 1 | 0 | 0 |
| <i>P. nobilis</i>     | 0                                          | 1 | 1 | 2 | 0 | 1 | 1 | 0 | 0 | 0 | 0 | 0 | 1 | 0 | 0 | 0 | 0 | 1 | 2 | 2 | 3 | 1 | 1 | 0 | 0 | 2 | 2 | 2 | 0 | 1 | 1 | 1 |   |
| <i>P. erckelii</i>    | 0                                          | 2 | 1 | 3 | 0 | 1 | 0 | 0 | 1 | 0 | 0 | 0 | 1 | 0 | 1 | 1 | 0 | 0 | 2 | 2 | 4 | 1 | 2 | 0 | 1 | 3 | 3 | 2 | 1 | 0 | 1 | 0 |   |
| <i>P. swierstrai</i>  | 0                                          | 1 | 0 | 5 | 0 | 1 | 1 | 0 | 0 | 0 | 0 | 0 | 1 | 0 | 0 | 0 | 0 | 0 | 2 | 2 | 3 | 2 | 2 | 1 | 0 | 3 | 3 | 2 | 1 | 0 | 1 | 0 |   |
| <i>P.</i>             |                                            |   |   |   |   |   |   |   |   |   |   |   |   |   |   |   |   |   |   |   |   |   |   |   |   |   |   |   |   |   |   |   |   |
| <i>castaneicollis</i> | 0                                          | 1 | 0 | 3 | 0 | 1 | 1 | 0 | 1 | 0 | 0 | 0 | 1 | 0 | 1 | 0 | 0 | 1 | 2 | 2 | 4 | 1 | 2 | 0 | 1 | 3 | 3 | 2 | 1 | 0 | 1 | 0 |   |
| <i>P. atrifrons</i>   | 0                                          | 1 | 2 | 1 | 2 | 1 | 1 | 0 | 1 | 0 | 0 | 0 | 1 | 0 | 1 | 0 | 0 | 1 | 2 | 2 | 4 | 1 | 2 | 0 | 1 | 3 | 3 | 2 | 1 | 0 | 1 | 0 |   |

*P.*

*ochropectus* 0 2 1 3 0 1 0 0 1 0 0 0 0 1 0 1 1 0 0 2 2 4 1 2 0 1 2 2 2 0 1 0 0

*P. jacksoni* 0 1 0 3 0 1 1 0 1 0 0 0 0 1 0 1 0 0 0 2 2 4 1 2 0 0 ? ? ? ? ? ? 0

*P. squamatus* 0 3 0 1 0 2 0 1 1 0 1 1 0 1 0 0 0 1 0 3 2 2 1 2 0 0 3 3 2 0 1 1 0

*P. s. schuetti* 0 3 1 1 0 2 0 1 1 0 1 1 0 1 0 1 0 0 0 3 2 2 1 2 0 0 3 3 2 0 1 1 0

*P. ahantensis* 0 4 0 1 0 1 1 0 1 0 0 1 0 1 0 1 1 0 0 4 2 2 1 2 0 0 2 2 2 0 1 1 0

*P.*

*griseostriatus* 0 3 0 1 0 1 1 0 1 1 1 0 0 1 0 0 0 0 0 3 1 1 1 2 0 0 3 1 1 0 0 1 0

*P.*

*bicalcaratus*

*bicalcaratus* 0 1 1 4 0 1 1 0 1 0 1 1 0 1 0 1 0 0 0 5 2 2 2 1 0 0 1 2 1 0 0 1 0

*P. b. ayesha* 0 1 1 4 0 1 1 0 1 0 1 1 0 1 0 1 0 0 0 5 2 2 2 1 0 0 1 2 1 0 0 1 0

*P. b.*

*adamauae* 0 1 1 2 0 2 1 0 1 0 1 1 0 1 0 1 0 0 0 5 2 2 2 1 0 0 1 2 1 0 0 1 0

*P.* 0 1 1 2 0 1 0 0 1 1 1 1 0 1 1 0 0 0 2 6 2 2 2 1 0 0 1 2 1 0 0 1 0

*icterorhynchus*

*s*

*P.*

*clappertoni* 0 1 1 4 0 1 1 0 0 0 1 1 0 1 0 1 0 0 1 2 2 2 2 1 0 0 2 2 1 0 0 1 0

*P. c. sharpii* 0 1 0 1 0 1 1 0 0 0 1 1 0 1 0 1 0 0 1 2 2 2 2 1 0 0 2 2 1 0 0 1 0

*P. harwoodi* 0 1 1 4 0 1 1 0 0 0 1 1 0 1 0 1 0 0 1 2 2 2 2 2 ? 1 2 2 1 0 0 1 0

*P. h.*

*hildebrandti* 1 1 2 2 1 1 0 0 1 1 1 1 0 1 1 0 1 0 0 2 2 2 1 2 1 0 1 3 2 0 0 1 0

*P. h. fischeri* 1 1 2 2 1 1 0 0 1 1 1 1 0 1 1 0 1 0 0 2 2 2 1 2 1 0 1 3 2 0 0 1 0

*P. natalensis* 0 3 0 1 0 1 0 0 1 1 1 1 0 1 1 0 0 0 0 2 1 2 1 2 0 0 2 3 2 0 1 1 0

*P. adpersus* 0 1 0 2 0 3 0 0 0 1 1 0 0 1 1 0 0 0 2 2 1 2 1 2 0 0 3 3 2 1 1 1 0

*P. capensis* 2 3 2 1 2 1 1 0 0 0 1 0 0 1 0 1 0 0 0 2 2 4 1 2 0 0 3 3 2 0 1 0 0

*P.*

*leucoscepus* 3 4 2 1 3 1 1 0 1 0 1 1 0 2 0 0 1 0 1 7 2 3 2 1 0 0 3 2 2 0 0 1 1

*P. l.* 0 1 2 1 0 1 0 0 1 0 1 1 0 2 0 0 1 0 1 7 2 3 2 1 0 0 3 2 2 0 0 1 1

*infuscatus*

*P. rufopictus* 0 3 0 1 0 1 1 0 1 0 0 1 1 3 0 1 0 0 1 7 2 4 2 1 0 0 2 2 2 0 0 1 1

*P. afer afer* 3 5 2 1 0 1 1 0 0 0 0 0 0 4 0 1 0 0 1 2 2 3 2 1 0 0 2 2 2 0 1 1 1

*P. a. cranchii* 0 1 0 1 0 1 1 0 1 0 0 1 0 4 0 1 1 0 1 2 2 3 2 1 0 0 2 2 2 0 1 1 1

*P. a.*

*humboldtii* 3 4 2 1 3 1 1 0 0 0 0 0 0 4 0 0 0 0 1 2 2 3 2 1 0 0 2 2 2 0 1 1 1

*P. swainsonii* 3 3 2 1 3 1 1 0 1 0 0 1 1 4 1 0 1 0 1 7 1 3 2 1 0 0 3 2 2 0 1 1 1

---

## 238 **Phylogenetics**

239 The ‘total evidence’ parsimony analysis based on 5149 characters (33 organismal and 5116 DNA  
240 bases) and 33 terminal taxa produced two equally parsimonious trees of length 2124, the strict  
241 consensus of which is presented as (Fig 2). Since only one of Hall’s spurfowl species groups [2], the  
242 phylogenetically terminal Bare-throated Group, emerged as monophyletic and the others are para- or  
243 polyphyletic, we recognize only one monophyletic genus for the African spurfowls: *Pternistis*.

244

245 **Fig 2. Strict consensus parsimony tree for spurfowls constructed from two most parsimonious**  
246 **trees.** Numbers mapped above nodes are jackknife support values. MS = Montane spurfowls, SCS =  
247 Scaly spurfowls, SVS = Southern Vermiculated spurfowls, NVS = Northern Vermiculated spurfowls  
248 and BTS = Bare-throated spurfowls.

249

## 250 **Cladogenesis**

251 *Pternistis hartlaubi*, one of Hall’s Vermiculated taxa [2], is the basal African spurfowl. Hartlaub’s  
252 Spurfowl occupies dense, mixed grass-shrub cover on boulder-strewn slopes and rocky outcrops in  
253 hilly and mountainous regions within a granite and sandstone substrate surrounded by semi-desert  
254 open savanna [53]. It is confined to central and northern Namibia, particularly on the Namibian  
255 escarpment and extreme southwestern Angola [54].

256 The upper mandible of *P. hartlaubi* is horn coloured and the lower yellowish. The male has a dark  
257 grey-brownish crown, a pronounced white eyestripe, offset by a black line below and chestnut ear  
258 coverts. The back is grey, faintly streaked and barred with brown. The belly is pale grey, heavily  
259 streaked with brown. The black and white under-tail coverts are conspicuous in flight and in courtship



260 display. The adult female has an orange-brown eyestripe, and a grey-brown head, cheeks, chin and  
 261 belly. The back is grey-brown with strong vermiculations [53].

262 Hartlaub's Spurfowl is markedly distinct from other African spurfowls [2, 53]. Indeed, it differs  
 263 from 'francolins' *sensu lato* in general, in that it: (1) has markedly sexually dimorphic plumage [2]; (2)  
 264 has a disproportionately long bill used for digging underground corms and tubers [53]; (3) is the  
 265 smallest spurfowl and is markedly sexually size-dimorphic (males 245-290 g., females 210-240 g. –  
 266 54]; (4) has yellow (normally black or red/orange-red in spurfowl) tarsi with virtually no tarsal spurs –  
 267 actually only tiny bumps [2]; (5) is socially monogamous throughout the year [53]; (6) has  
 268 vocalizations markedly different from (but still link with) the rest of the spurfowls [17, 18]; (7)  
 269 demarcates and defends its territory year-round, using a combination of uniquely antiphonal duet  
 270 calling (initiated by the hen) and displays, rather than overt aggression [53]; and (8) seems not to  
 271 require standing/flowing water for drinking [53].

272 With regard to putative subspecies, populations from southern Angola (nominate '*hartlaubi*')  
 273 are somewhat smaller than those from Namibia. Those from the Kaokoveld and Erongo ('*crypticus*')  
 274 are paler than those from the Waterburg and Otavi ('*bradfieldi*') in the east. We regard these  
 275 differences as clinal variation. The two specimens (from Erongo and the Waterburg) were 0.4% CYTB  
 276 divergent. We recognize no subspecies for this taxon.

277 Hartlaub's Spurfowl's closest CYTB taxon is *P. squamatus* at 7.8% sequence divergence.

278 Hall's [2] Montane spurfowls follow on phylogenetically from *hartlaubi*, but are paraphyletic (Fig.  
 279 2). They are forest-dwelling taxa, forming two, monophyletic clades: *camerunensis* + *nobilis* and  
 280 *erckelii* + *ochropectus* + *castaneicollis*, linked by *swierstrai*. Then comes *jacksoni* as a link to the also  
 281 paraphyletic, lowland/secondary forest-dwelling Scaly spurfowls.

282 Thereafter come the also paraphyletic woodland, savanna, scrub and bush dwelling Vermiculated  
 283 (divided into northern and southern assemblages) and the monophyletic Bare-throated taxa.

284

### 285 **The Montane spurfowls**

286 There are seven Montane spurfowl species, one with two subspecies: *swierstrai*, *camerunensis*,  
 287 *nobilis*, *erckelii*, *ochropectus*, *castaneicollis* (*castaneicollis*, *atrifrons*) and *jacksoni*.

288 They are distributed across the mountains of north-eastern Africa from Eritrea to Mt. Kenya,  
 289 extending west through the Albertine Rift, to Mt. Cameroon and south to the highlands of Angola [2]  
 290 (Fig 3). Montane spurfowls are confined to forested habitat, which provides roosts and cover, although  
 291 some taxa (e.g. *P. erckelii*) will venture out into wooded scrub, heath and grassland with shrubs [54].

292

293 **Fig 3. Geographical distributions of Hartlaub’s Spurfowl, Montane spurfowls and the ‘Arid**  
 294 **Corridor’**. Arrows draw attention to phylogenetically sequential cladogenesis.

295

296 The Montane spurfowls are the morphologically least homogeneous of Hall’s spurfowls [2]. There is  
 297 no diagnostic ‘Group’ morphological character other than that the males have the crown, lower back,  
 298 primaries and tail plain brown or red-brown. Females of the relatively small, moderately sexually  
 299 dimorphic species (*P. camerunensis*, *P. swierstrai*) have vermiculated primaries, lower back and tail.

300 Variation in some characters follows geographically clinal trends, with the birds of the extreme  
 301 northeast being: the largest and most heavily spurred with dark bills, yellowish tarsi, no bare skin  
 302 round the eyes, with the sexes alike [2]. The two isolated, sexually dimorphic western species  
 303 (*camerunensis* and *swierstrai*) are the least heavily spurred and the smallest species. Thus, they most  
 304 closely resemble the basal, and also sexually dimorphic, *P. hartlaubi*. The central African species,

305 *nobilis*, ‘connecting’ these three species to those in the northeast is of intermediate body mass [54].  
306 Generally, Montane spurfowls differ from one another primarily in their belly plumage, particularly on  
307 mid- and lower belly.

308 The closest non-montane CYTB taxon to them is *P. squamatus* at 5.3% sequence divergence.

309

310 *Pternistis swierstrai* is an uncommon, endemic of Angola, confined to undergrowth within patches  
311 and edges of relict evergreen forest in the highlands of western Angola, Mountains Moco and Soque,  
312 the Bailundu highlands and Mombolo Plateau along the escarpment, with isolates on the Chela  
313 escarpment, Tundavala (Huila District) and Cariango (Cuanza Sul District) (Fig 3) [54]. It ventures  
314 into grass- and bracken-covered slopes and gullies [54].

315 Swierstra’s Spurfowl is a small spurfowl (both sexes 375–565 g [54]), and has an orange-red bill, a  
316 yellow ear-patch, yellow eye-ring on males (blue in females), red tarsi with one spur, only in males. It  
317 is weakly sexually dimorphic in plumage. Both sexes have a conspicuous white eyestripe and throat,  
318 brown back plumage (irregularly blotched in the female). The male’s black breast contrasts with the  
319 white throat, whereas the lower belly feathers have broad buff central streaks with blackish margins.  
320 The belly plumage of the female is white, barred/blotched with dark brown [2].

321 Its closest CYTB taxon is *P. squamatus* at 5.3% sequence divergence.

322

323 *Pternistis camerunensis* is sister to *nobilis*. It is endemic to, and locally distributed within dense  
324 undergrowth and edges of forests on the south-eastern slopes of Mt. Cameroon, between 850 and 2100  
325 m above sea level (Fig 3) [54]. The Mt Cameroon Spurfowl is a small (male ~593 g., female ~509 g.),  
326 sexually dimorphic spurfowl, and has an orange-red bill, red eye-ring, and orange-red tarsi with 1-2  
327 spurs, only in males. The male has a dark brown crown and nape. Its throat is grey-buff with the belly

328 feathers chestnut with grey edges. Its upper tail coverts and primaries are grey brown, and wing  
329 coverts and the lower neck are deep maroon, with light grey scalloping on the lower neck. Its back is  
330 rich dark brown (excluding the lower neck). The belly and lower neck are plain grey with some black  
331 feather centres and shaft streaks. The chest and belly plumage of the female is mottled and  
332 vermiculated with black, dark brown and buff with some off-white U- to V-patterning on the belly and  
333 lower neck .

334 The closest CYTB taxon to *P. camerunensis* is its sister-taxon, *P. nobilis*, at 7.4% sequence  
335 divergence.

336

337 *Pternistis nobilis* [54] is endemic to the highland Ruwenzori and Kivu forests in the Albertine Rift  
338 and mountains in far western DR Congo, south-western Uganda and borders of Rwanda and Burundi,  
339 and is locally common in dense undergrowth, forest edge and moist bamboo thickets (Fig 3). The  
340 Noble Spurfowl [54] is medium-sized and sexually monomorphic (males averaging 877 g., females  
341 635 g.). It has a red bill, eye-ring and tarsi with 1-2 spurs (upper shorter), only in the male. It has a  
342 grey-brown head, primaries and rump, and a buff throat. It is dark maroon overall, particularly on the  
343 wings and back, with light grey scalloping on the lower neck. The rest of the belly feathers are  
344 chestnut with narrow grey or whitish edges or scallops [2].

345 With regard to subspecies of *P. nobilis*, we regard ‘*chapini*’, from the Ruwenzori Mountains as an  
346 idiosyncratic variant since it differs only by having somewhat narrower greyish edges to the belly  
347 feathers [2].

348 The closest CYTB taxon to *P. nobilis* is its sister-taxon, *P. camerunensis*, at 7.4% sequence  
349 divergence.

350

351

352 *Pternistis erckelii*, the most northerly distributed Montane spurfowl, is sister to *P. ochropectus*. It is  
353 distributed in giant heath, forest scrub remnants and edges above 2000 m, extending, relatively  
354 continuously up to 3000 m, from the vicinity of Addas Ababa in the massif of central and northern  
355 Ethiopia southwards to southern Eritrea (Fig 3). Unlike other Montane spurfowls, it will venture out of  
356 forest into adjacent heath and grassland. Erckel's Spurfowl is the largest African spurfowl (males  
357 1050-1590 g., one female 1136 g. [54]). It has a black bill and yellowish tarsi with two spurs (upper  
358 longer), only in the male. It is sexually monomorphic, and has a black forehead and eyestripe, chestnut  
359 crown, grey ear coverts and white throat. Its lower neck is grey like the upper belly, but with greyish  
360 brown margins and a thin central buff streak, whereas the upper belly feathers have central greyish  
361 black streaks. Lower belly feathers have a broad buff central streak constricted in the middle and  
362 expanded distally into a tear-drop, margined with rufous [2]. The "somewhat greyer" [2] putative  
363 subspecies, 'pentoni', an isolated population from the Red Sea Hills at Erkowit, is not recognized.

364 The sister and CYTB closest species to *P. erckelii* is *P. ochropectus* at 2.6% sequence divergence.

365

366 *Pternistis ochropectus* is a large spurfowl (one male 809 g., one female 605 g. [54]) endemic to the  
367 evergreen juniper forest mostly above 1200 m. on the Plateau du Day of Djibouti (Fig 3). The Djibouti  
368 Spurfowl [54] has a black bill with the lower mandible yellowish and yellow tarsi with two spurs  
369 (upper longer), only in the male. The lower belly feathers of *P. ochropectus*, *P. erckelii* and *P.*  
370 *castaneicollis* are similar, but *P. erckelii* and *P. castaneicollis* are more heavily marked with brown on  
371 the back and breast. The belly feathers of *ochropectus* have a broad buff central streak constricted in  
372 the middle and expanded distally into a tear-drop, margined by a greyish black U-shaped streak [2].

373 The CYTB closest and sister-species to *P. ochropectus* is *P. erckelii* at 2.6% sequence divergence.

374

375 *Pternistis castaneicollis* is a large spurfowl (males 915-1200 g, females 550-650 g. [54]), and is  
376 restricted to montane heath moorlands, juniper forests and forest edge/scrub above 2800 m. It extends  
377 broadly in montane ‘islands’ along the mountain ranges of central and south Ethiopia on both sides of  
378 the Rift Valley to Somalia in the extreme northwest, and to the Kenyan border in the extreme south  
379 (Fig 3) [54]. The Chestnut-naped Spurfowl is morphologically geographically variable, but most  
380 similar to *P. erckelii* [54]. It has a red bill, yellow ear-patch, yellowish eye-ring in males (blue in the  
381 female) and orange-red legs with two equally long spurs, only in the male. It is sexually monomorphic  
382 in plumage, but females are smaller. It has less black on the face than *erckelii* and *ochropectus*. Its  
383 belly feathers having a broad buff central streak, constricted in the middle and expanded distally into a  
384 tear-drop, margined with rufous. Its eastern Ethiopian populations have an extensive double-U-  
385 patterning on the back with wing coverts and breast clearly defined in black and white, with some  
386 ochre and chestnut, grading to mainly white on the belly [2].

387 The closest CYTB taxon is *P. erckelii* at 4.2% sequence divergence.

388 The subspecies *atrifrons* (for which we had no DNA sequence data) is confined to the Mega  
389 Mountains of southern Ethiopia (Fig. 3). It was recently elevated to full species [55] and is 1.2-1.3%  
390 CYTB divergent from *P. c. castaneicollis*. It differs from other populations of *castaneicollis* by having  
391 the throat and belly cream instead of white and reduced or absent chestnut colouration and U-  
392 patterning on the neck and flanks. Despite these genetic and morphological differences, *atrifrons* has  
393 similar vocalizations, habits and habitat to other forms of *P. castaneicollis* [2, 54]. Hence, in terms of  
394 our stated criteria, its elevation to full species is not supported. The putative subspecies from Somalia,  
395 ‘*ogoensis*’, is clinally more grey [2], and those from isolated populations west of Lake Zwai,

396 ‘*kaffanus*’ are clinally less well-defined and U-patterned [2]. Moreover, their CYTB divergence from  
 397 nominate *castaneicollis* is 0.2-0.7%. Hence, these taxa are synonymized within *castaneicollis*.

398

399 *Pternistis jacksoni* occurs between 2200 and 3700 m [54], primarily in forests, forest edges,  
 400 moorlands, bamboo patches and within the Aberdares and Mt. Kenya, Mau Escarpment and  
 401 Cherangani Mountains in *Podocarpus*, *Juniperus* and other Afro-alpine forests of western and central  
 402 Kenya, extending marginally into Uganda (Fig 3). Jackson’s Spurfowl is large (~1130–1160 g, with  
 403 females slightly smaller [54]). It has a red bill, yellow-orange ear-patch and eye-ring and tarsi with 1-2  
 404 spurs (upper shorter), only in the male. Its throat is buff and the lower neck greyish with the proximal  
 405 part of the lower neck similarly patterned to the rest of the belly. Lower neck feathers are chestnut-  
 406 coloured edged with buff to white, but the degree of chestnut and buff and white varies among  
 407 individuals [2]. The subspecies ‘*pollenorum*’ from Mt. Kenya is not recognized because it is only  
 408 somewhat darker [2] than other forms of *P. jacksoni*.

409 The closest CYTB taxon is *P. griseostriatus* at 5.0% sequence divergence.

410

## 411 **The Scaly spurfowls**

412 The paraphyletic Scaly spurfowls comprise three allopatric species (*P. squamatus*, *P. achantensis*  
 413 and *P. griseostriatus*). The fourth species, *P. schuetti*, is parapatric with *P. squamatus* [Fig.4] [2].

414 Scaly spurfowls have the plainest plumage [2], with the least patterning and no strong colour. They are  
 415 characterized by having ‘scaly’ underparts, and inhabit vestigial patches of montane and lowland  
 416 forest, secondary and riverine forests, forest edges and clearing/cultivation therein of West Africa  
 417 eastwards to the Sudan and north-eastern Tanzania, and Central Africa and the Benguela district of  
 418 north-western southern Africa (Fig 4) [54].

419

420 **Fig 4. Geographical distributions of Scaly spurfowls.**

421

422 Compared with other spurfowls, these taxa are poorly diagnosed in terms of plumage pattern and  
423 colouration [54]. All taxa have unpatterned faces, whitish throats and brown upperparts, some with  
424 faint vermiculations. The underparts are brown or creamy-buff with very narrow darker edges,  
425 providing the characteristic ‘scaly’ appearance. There is no marked plumage dimorphism, with the  
426 exception that females tend to be more vermiculated than males [2].

427

428 *Pternistis squamatus* is sister to *P. schuetti*, and occurs in forested areas in south-eastern Nigeria,  
429 extending east into the DR Congo and up to 3000 m (on Mt Elgon) in Uganda/Kenya (Fig 4) [54]. It  
430 has a red bill, orange-red tarsi with 1-2 spurs (lower longer) in males only [54]. There is no size  
431 dimorphism (males 372-565 g., females 377-515 g.) and plumage, with U-patterned vermiculated  
432 upperparts, less so in males. It is the least distinctly patterned scaly taxon. The brown upperparts are  
433 indistinctly vermiculated faint grey with each feather with a blackish centre tinged maroon, and the  
434 upper back has faint buff U-patterning. The scaly underparts are brown with ill-defined dark shaft  
435 streaking [2].

436 The closest CYTB taxon is its sister-species, *P. schuetti*, at 3.4% sequence divergence.

437

438 *Pternistis schuetti* occurs in eastern DRC extending east to Uganda, Ethiopia, Kenya, Tanzania and  
439 Malawi [54] (Fig 4). It resembles *squamatus*, but is less vermiculated overall, and the scaly pattern on  
440 the lower neck is less clearly defined, each feather has a deep red-brown centre [2]. Populations west  
441 of the Rift Valley in Kenya south towards Kilimanjaro, Monduli and Mt. Meru in northeastern



442 Tanzania [2], become clinally increasingly darker and greyer (more readily seen in males), and tend to  
 443 have less white on the belly. Poorly sampled, isolated populations to the south ‘*usambarae*’,  
 444 ‘*uzungwensis*’ and ‘*doni*’ are clinal or idiosyncratic variants of *schuetti*, but may warrant subspecific  
 445 status should they exhibit significant genetic divergence.

446 The closest CYTB taxon to *schuetti* is *griseostriatus* at 2.7% sequence divergence.

447 *Pternistis s. maranensis* (1.2% divergent from nominate *schuetti*) occurs further east on Mt  
 448 Kilimanjaro (up to 2000 m), Monduli, Mt Meru and in the Chyulu Hills (Fig 4). It is much darker and  
 449 less patterned than *schuetti* [2]. There are scattered populations of Scaly spurfowls that show variation  
 450 in plumage. About 240 km southeast of Kilimanjaro, birds (‘*usambarae*’) from the Usambara  
 451 Mountains [2] have the areas around their eyes and cheeks freckled with black and white instead of  
 452 uniform brown. Another isolated population from forests on the Vipya Plateau between 900 and 2800  
 453 m (‘*doni*’) in Malawi has upper and underparts that are more red-brown with some white streaking on  
 454 the underparts [2]. These, for now, are included within nominate *schuetti*.

455

456 *Pternistis ahantensis* [54] occurs within gallery and secondary, coastal lowland West African  
 457 forests in three disjunct populations west of the Niger River: southern Senegambia and northern  
 458 Guinea-Bissau; southern Guinea, Sierra Leone and western Liberia; and north-eastern Ivory Coast and  
 459 Ghana through the central Togo and central Benin to south-western Nigeria (Fig 4).

460 The Ahanta Spurfowl is a medium-sized spurfowl (males +-608 g., females +- 487 g.) and has an  
 461 orange bill with a black base and yellow-orange tarsi with 1-2 spurs (lower longer), only in the male  
 462 [54]. It is the most patterned Scaly spurfowl, with breast and flank feathers having paler edges and  
 463 darker centres. The feathers on its upperparts are vermiculated (distinct on the lower neck, indistinct  
 464 on the back) with blackish centres and a reddish-brown shaft-streaking, those on the lower neck have

465 some white U-patterning. The underparts are dark-brown chestnut with white and darker brown U-  
 466 patterning [2]. The isolated western populations (*'hopkinsoni'* for which we had no CYTB  
 467 information) are paler overall [2] than those in the east and probably do not warrant taxonomic status.

468 The closest CYTB taxon to *ahantensis* is *P. squamatus* at 4.2% sequence divergence.

469

470 *Pternistis griseostriatus* is a small spurfowl (males 265-430 g., females 213-350 g. [54]) endemic to  
 471 vestigial patches of forest in the Angolan western escarpment (Fig 4). The Grey-striped Spurfowl has a  
 472 black bill with a red base (lower mandible orange-red) and its tarsi are orange-red with a single spur in  
 473 the male. It is sexually monomorphic, and its lower neck feathers and wing coverts are chestnut and  
 474 broadly edged and vermiculated with grey, similar to the pattern in *squamatus* and *ahantensis*, but  
 475 paler. However, the underparts are plain, and the upper belly and flank feathers are chestnut and edged  
 476 with greyish or creamy buff [2].

477 The closest CYTB taxon is *P. schuetti* at 2.7% sequence divergence.

478

## 479 **The Vermiculated spurfowls**

480 Hall's Vermiculated taxa [2] are the most widely distributed spurfowls within Africa. They occur  
 481 more or less continuously from Senegal to Eritrea southwards to Namibia and South Africa (Figs 5 and  
 482 6). There is even an isolated population (*ayesha*) of *bicalcaratus* in Morocco, making it one of the few  
 483 sub-Saharan bird species with natural populations north and south of the Sahara [56]. Northern taxa  
 484 frequent grasslands and cultivation within woodlands and acacia savanna and steppe. South of the  
 485 equator, Vermiculated taxa frequent thick bush on hillsides and riparian watercourses. All taxa have  
 486 brown or grey-brown heads, backs, wings and tails, with lighter vermiculations and/or V- and U-  
 487 shaped patterning. Most taxa have a white eye-stripe.

488

489 **Fig 5. Geographical distributions of Vermiculated spurfowls (SOUTH).**490 **Fig 6. Geographical distributions of Vermiculated spurfowls (NORTH).**

491

492 There are eight species and seven subspecies: *P. hildebrandti* (*hildebrandti* and *fischeri*), *P.*  
 493 *natalensis*, *P. adpersus*; *P. capensis*, *P. icterorhynchus*, *P. bicalcaratus* (*bicalcaratus*, *adamauae*,  
 494 *ayesha*), *P. clappertoni* (*clappertoni*, *sharpii*), and *P. harwoodi*.

495 Within the southern taxa, *P. hildebrandti*, occurs from sea level to about 2500 m. in east and south-  
 496 central Africa, east and south from Lake Victoria through Kenya, most of Tanzania, northern  
 497 Mozambique, north-eastern Zambia and Malawi (Fig 5) [54]. The species is sparsely distributed on  
 498 rocky ground associated with dense thicket along rivers and on hillsides, acacia savanna, Miombo  
 499 woodland and forest edge.

500 Hildebrandt's Spurfowl is a medium-sized spurfowl (two males 600 and 645 g., two females 430  
 501 and 480 g. [54]) and comprises two subspecies (*hildebrandti* and *fischeri*) with the former being  
 502 sexually dimorphic. It has a reddish mandible and brown culmen with a yellow base, a yellow ear-  
 503 patch and eye-ring, red tarsi with 1-2 spurs on both sexes. The dorsal plumage of males resembles that  
 504 of *P. icterorhynchus*. It is greyish brown with vermiculations, and the hind and lower neck are streaked  
 505 black with white margins, and the belly plumage has marked black blotching. Females have similar  
 506 back plumage to males, but (especially in *P. h. fischeri*) differ markedly in having orange-brown  
 507 underparts [2].

508 *Pternistis h. fischeri* [2] (1.0% sequence divergent from *hildebrandti*) from southern Malawi,  
 509 Mozambique and south-western Tanzania differs from *hildebrandti* in that females have an  
 510 unpatterned nape, hind neck and upper belly, in sharp contrast to an orange-brown abdomen. Birds

511 from Kenya, ‘*altumi*’ [2], do not warrant taxonomic recognition because their plumage is intermediate  
 512 between nominate *hildebrandti* and *fischeri*.

513 The sister-taxon to *P. hildebrandti* is *P. h. fischeri* with a CYTB (for *fischeri*) sequence divergence  
 514 of 0.8%. Other forms of *hildebrandti* are >2% divergent from *natalensis*, its sister-species. In the  
 515 Luangwa valley, the presence of specimens with intermediate plumage suggests that *P. hildebrandti*  
 516 may interbreed (or have interbred) with *P. natalensis* [2].

517

518 *Pternistis natalensis* is a medium-sized spurfowl (males 415-723 g. females 370-482 g. [54])  
 519 distributed across south-eastern Africa, from Zambia, Zimbabwe, inland Mozambique, eastern  
 520 Botswana, Swaziland and north-eastern South Africa (Fig 5). It occurs in thick riverine bush, but will  
 521 venture into dry lowveld savanna and adjacent grasslands [9]. The Natal Spurfowl [54] has an orange  
 522 bill with a dull greenish base, and the orange tarsi have a single spur, only in the male. It is normally  
 523 sexually monomorphic, but some populations ‘*neavei*’ from southern Zambia and western  
 524 Mozambique are slightly dimorphic. The hindneck is mottled black and white, the back is highly  
 525 vermiculated in greyish-brown and black, with white and buff markings. The belly is buff with the  
 526 upper belly to mid-belly being heavily patterned in black and buff U-patterning is concentrated on the  
 527 breast with the extreme lower abdomen having no or few marks [2].

528 The closest CYTB taxon is *P. hildebrandti fischeri* at 0.8% sequence divergence. Next closest is *P.*  
 529 *h. hildebrandti* at 3.1% divergence.

530

531 *Pternistis adspersus* is a smallish spurfowl (males 340-635 g., females 340-549 g. [9, 54]) and  
 532 occurs in dense bush, mixed woodland and low scrub thickets interspersed with open ground, mostly  
 533 on Kalahari sands along watercourses in Namibia, Botswana, southern Angola and south-western

534 Zambia (Fig 5). The Red-billed Spurfowl is a monotypic species with an orange-red bill and tarsi,  
535 yellow ear-patch and eye-ring. Males have a single spur. The upperparts are finely vermiculated, and  
536 the underparts are narrowly distinctly barred with black and white, variably on the lower neck [2].

537 The closest CYTB taxon is *P. capensis* at 3.8% sequence divergence.

538

539 The monotypic *Pternistis capensis* is the largest Vermiculated spurfowl (males 870-1000 g.,  
540 females 640-900 g.). It is endemic to thick cover and rocky river valleys in the Fynbos Biome of south-  
541 western South Africa, with isolated populations extending deep into the Karoo biome and lower  
542 stretches of the Orange River (Fig 5) [9]. The Cape Spurfowl [9] has a brown upper mandible (lower  
543 red), and orange red tarsi with one spur (females) and sometimes two (males). It has distinctive  
544 uniform brown and white double V- or U-shaped patterning on the back, breast and belly, while the  
545 throat has irregular black flecking. The breast and belly feathers have broad white shaft streaks [2].

546 The closest CYTB taxon is *P. adpersus* at 3.8% sequence divergence.

547

548 Moving to the northern vermiculated taxa, *P. icterorhynchus* is a medium-sized spurfowl (males  
549 504-588 g. females 20-462 g. [54]) and occurs in grasslands, open woodlands and adjacent agricultural  
550 lands in the Central African Republic, northern DR Congo, extending east to South Sudan and Uganda  
551 (Fig 6). Heuglin's Spurfowl has a yellow-orange black bill, small yellow eye-patch, yellow-orange  
552 tarsi with 1-2 (upper longer), in males only. It is monotypic and sexually monomorphic species (Fig 6),  
553 with a chestnut crown, brown back diagnosed by having less V-shaped patterning on the lower neck  
554 and more vermiculations on the back than other vermiculated taxa. Its underparts are buff heavily  
555 marked with dark brownish-back V-shaped markings [2].

556 The closest CYTB taxon is *P. bicalcaratus* at 3.3% sequence divergence.

557

558 *Pternistis bicalcaratus* comprises three sexually monomorphic subspecies (Fig 6). All the taxa are  
559 similarly patterned above and below, differing in the degree of colouration and vermiculation, and the  
560 size of the arrow-shaped buff marks in the centre of the belly feathers [2]. They occur [54] in dry  
561 grasslands, open savanna, palm groves and cultivated areas of West Africa from Senegal east to  
562 northern Cameroon and southern Chad (Fig 6).

563 The nominate form of the Double-spurred Spurfowl [54], *bicalcaratus* is a medium-sized (males +-  
564 507 g., females +-381 g.) spurfowl, and has a greenish-black bill and 1-2 greenish tarsi (upper longer),  
565 much shorter in females. It has no bare facial skin. It has a pale rufous crown, and a white eyestripe. It  
566 has rufous-chestnut on the lower neck and the remaining upperparts are vermiculated with V-shaped  
567 patterning. It has buff underparts, distinctly and heavily streaked with black and chestnut small arrow-  
568 shaped buff marks on most belly feathers [2]. The more heavily patterned *ayasha* (from Morocco, not  
569 mapped) is similar (1.0% CYTB divergent) to *bicalcaratus*, but is faintly vermiculated and slightly  
570 more rufous on the lower neck, with small arrow-shaped buff marks on the belly feathers [2]. The  
571 darkest form is *adamauae* (1.7% CYTB divergent) with very little rufous on the lower neck, and the  
572 underparts are more buff with extremely reduced chestnut and larger arrow-shaped buff marks long the  
573 centres of the belly feathers [2].

574 The closest CYTB species is its sister-species, *P. icterorhynchus*, at 2.7% sequence divergence.

575

576 *Pternistis clappertoni* [54] comprises two widespread subspecies extending up to 2300 m in semi-  
577 arid grassland and bushy savanna and adjacent cultivations across north-central Africa from far eastern  
578 Mali, central Niger, far north-eastern Nigeria, Chad, southern Sudan, South Sudan, northeastern  
579 Uganda and western Ethiopia (Fig 6). It also occurs in the Nile and Blue Nile River valleys [2].

580 Clapperton's Spurfowl is a medium-sized spurfowl (males 450-604 g. females 300-530 g. [54]). It  
 581 has a black bill with a red base and red tarsi with 1-2 spurs in males only. The bare skin around the eye  
 582 distinguish it from *P. bicalcaratus*, *P. icterorhynchus* and *P. castaneicollis*. The brown upperparts of  
 583 the nominate form, *clappertoni*, have U-shaped patterning (very similar to those of *P. icterorhynchus*),  
 584 but are more orange brown and vary geographically in the degree of vermiculation and U-patterning. It  
 585 has a fairly extensive white throat and the neck is buff below with black to brownish marks. *P. c.*  
 586 *sharpii* (1.4% CYTB divergent from *clappertoni*) has marks on the belly which are streakier than those  
 587 in *clappertoni* in having a more buffy white background below with the upper belly being similarly U-  
 588 patterned extending onto the back [2]. A single specimen collected at "Ngeem" at Lake Chad (possibly  
 589 Nguigmi), the type of *Francolinus' tschadensis'* is possibly a hybrid between *clappertoni* and  
 590 *icterorhynchus* [2].

591 The closest CYTB taxon to *clappertoni* is its sister-species, *P. harwoodi*, at 1.4% sequence  
 592 divergence. The next closest taxon is *P. bicalcaratus*, jumping to 3.1% divergence.

593  
 594 *Pternistis harwoodi* is a medium-sized (one male 545 g., one female 446 g. [54]), poorly known  
 595 species occurring in *Typha* reedbeds, scrub, thicket and adjacent cultivations along the gorges of the  
 596 Jemmu valley, the Blue Nile and its tributaries of East Africa, and the highlands of central Ethiopia  
 597 (Fig 6).

598 Harwood's Spurfowl [2] has a red bill with a black tip, bare red eye-ring and tarsi with 1-2 spurs, in  
 599 males only. It most closely resembles *P. natalensis*, which lacks the bare red facial skin, but has more  
 600 defined U-patterning on the nape, with similar U-patterning on the underparts. The upperparts of the  
 601 male that we examined is grey speckled and finely barred with blackish and buff above. The lack of a  
 602 white eyestripe sets it apart from other Vermiculated spurfowls. The hind and lower neck, sides of

603 face, and throat are speckled with black and white. It has irregular double-V shaped patterning on its  
 604 underparts which tends to be scattered on the lower extreme of the buff belly.

605 The closest CYTB taxon is *P. clappertoni* ‘*sharpii*’ at 0.7% sequence divergence. The next closest  
 606 taxon is *P. natalensis* at 4.8%.

607

## 608 **The Bare-throated spurfowls**

609 We recognize five species and five subspecies: *leucoscepus* (*leucoscepus*, *infuscatus*), *cranchii*, *afer*  
 610 (*afer*, *castaneiventer*, *humboldtii*), *swainsonii*, and *rufopictus*.

611 The Bare-throated spurfowls [2, 54] are largely allo/parapatric and ecologically segregated meta-  
 612 populations, extending from Ethiopia and Eritrea in northeast Africa, westwards through Kenya,  
 613 Tanzania, Sudan and Uganda to the Congo and Gabon, and south through Angola, northern Namibia,  
 614 Botswana, Zimbabwe, and Mozambique to South Africa (Figs 7 and 8). Species inhabit mesic lowland  
 615 grasslands and open woodland savanna/bush often adjacent to water.

616

617 **Fig 7. Geographical distributions of Bare-throated spurfowls (part).**

618 **Fig 8. Geographical distributions of Bare-throated spurfowls (concl.).**

619

620 Bare-throated spurfowls are sexually monomorphic in plumage (although females of some species  
 621 are slightly vermiculated), with a body mass ranging from 340–950 g [2, 54]. They are distinguished  
 622 from other spurfowls by having bare skin on the throat and a patch around the eye and plain dark  
 623 upperparts without pale vermiculations. Their tarsi are black, red, orange or brown with spurs well-  
 624 developed in males only. They have a long robust lower spur and, in some taxa (*P. leucoscepus* and *P.*  
 625 *rufopictus*), often a shorter blunt upper spur, less prevalent in *P. afer* and rare in *P. swainsonii* [2].



626

627 *Pternistis leucoscepus* is a medium-sized, markedly dimorphic spurfowl (males 615-896 g., females  
628 400-615 g. [54]). This species is the most morphologically and ecologically differentiated species and  
629 comprises two subspecies: *leucoscepus* and *infuscatus* (Fig 3). It occurs in arid-acacia savanna and  
630 sub-desert scrub in eastern Africa (most of Kenya, north-eastern Uganda, south-eastern South Sudan  
631 and northern Tanzania), extending north and east through Ethiopia and Somalia nearly to the tip of the  
632 'Horn' of Africa (Fig 7) [2, 54].

633 Both subspecies of the Yellow-necked Spurfowl [2, 54] have black bills with a red base, bare red  
634 skin around the eye, bare yellow throat skin, and black tarsi with 1-2 spurs on the males. The upper  
635 back plumage is dark brown with white shaft streaks and the underparts are streaked with white and  
636 chestnut with narrow white edges and a triangular white patch at the tip, tapering up the shaft. The  
637 primaries have a conspicuous white patch, which is visible during flight. The northern subspecies  
638 *infuscatus* at 0.9% sequence divergence from *P. l. leucoscepus*, differs in having more chestnut than  
639 white on the underparts in contrast with the dominant white over chestnut present in *leucoscepus*.

640 The closest CYTB taxon to *P. leucoscepus* is *P. cranchii* at 3.5% sequence divergence.

641

642 Hall's [5] 'Red-necked' Spurfowl [2, 54] is the most widespread and morphologically variable  
643 'species' of Bare-throated spurfowl. It has a complex geographical distribution and occurs in relatively  
644 mesic evergreen forest edges, and woodland in central Africa and Kenya, extending southwards  
645 through, Zambia, Malawi, Tanzania, south-western Angola, north-western Namibia, eastern  
646 Zimbabwe, Mozambique into eastern South Africa (Fig 8) [9].

647 All taxa ascribed to this spurfowl were lumped into one species [2], *afes*, with two polytypic  
648 subspecies, *afes* and *cranchii* [h]. We elevate *cranchii* to full species status (Fig. 8). Both species are

649 medium-sized (males 480-1000 g., females 370-690 g.) and have a red bill, throat skin and tarsi with  
650 1-2 spurs in males only [9].

651

652 *Pternistis cranchii* [2, 9] includes populations from southern Congo, northern Angola, northern  
653 Zambia, western Tanzania, Uganda and Lake Victoria shores (Fig 8). It is characterized by having no  
654 white on the head or black on the abdomen. The underparts are heavily and finely vermiculated with  
655 grey with heavy chestnut brown streaking on the abdomen. Its lower belly feathers have buff central  
656 streaks vermiculated with blackish grey and margined with broad chestnut (degree of chestnut colour  
657 varies geographically) and a black and grey facial pattern. Populations from the Ruzizi valley, north of  
658 Lake Tanganyika, (*'harterti'*) are much darker overall, and the streaking on the abdomen is maroon,  
659 rather than chestnut [2].

660 Within Hall's [2] *'cranchii'* forms (*cranchii*, *'nyanzae'*, *'harterti'*), the CYTB divergences are c.  
661 1%, and the lowest CYTB divergence between a form of *cranchii sensu lato* to one within *afer* (from  
662 Angola) is 1.6% sequence divergence. Thereafter, the pairwise divergence values for forms of *cranchii*  
663 versus *afer* well exceed 2%. All 'hybrid' forms studied (*'intercedens'*, *'bohmi'*, *'itigi'*, *'cunenensis'*  
664 and *'benguellensis'*) are 0.7-0.8 % divergent from 'pure' *cranchii* and >2% divergent from *afer* taxa.

665

666 In marked contrast to *cranchii*, populations of *P. afer sensu stricto* [2, 9, 54] have unvermiculated  
667 underparts, and are strongly patterned black and white on the face and underparts, which have broadly  
668 streaked greyish black central streaks with buff margins (particularly in the nominate subspecies *afer*)  
669 or have thin greyish black central streaks separating the long buff parallel streaks margined with black  
670 or sometimes maroon (in south-eastern South African specimens).

671 In the nominate *P. a. afer*, confined to south-western Angola (Fig 8), the face is white, and the  
672 underparts are streaked broadly with black and white, with black centres and white margins. Elsewhere  
673 in Angola, specimens from the Upper Okavango basin generally resemble *cranchii* with some  
674 intermediate plumage forms ‘hybrids’ – ‘*cunenensis*’ genetically closest (0.5% divergent) to *cranchii*.

675 The closest CYTB species to Angolan *P. a. afer* is *P. c. cranchii* at 1.6% sequence divergence. It is  
676 2.7% divergent from South African *P. afer*.

677 In south-eastern Africa, *P. a. castaneiventer*, occurs in South Africa from KwaZulu-Natal south and  
678 west into the Eastern Cape Province (Fig. 8). It has a wholly black face with the upper breast and  
679 abdomen streaked with black and white, edged maroon in birds from KwaZulu-Natal. Birds from  
680 eastern Zimbabwe and southern Mozambique have a white face and ‘necklace’ above the breast.

681 *P. a. castaneiventer* is 2.7% divergent from South African *P. afer*.

682 The closest non-*afer* CYTB species-level taxon is the *P. c. ‘cunenensis’* at 2.7% sequence  
683 divergence.

684 *Pternistis a. humboldtii* ranges within eastern Africa, from southern Kenya and Tanzania south to  
685 Mozambique (Fig. 8). It is 1.3% divergent from *P. a. castaneiventer* and 2.6% from *P. cranchii*, has a  
686 black face with a white jaw-beard and black belly patch. Feathers on the upper belly are mainly grey  
687 with black shaft streaks which contrast with the abdomen to form a black patch, and the flanks which  
688 are streaked black and white. Birds from coastal Kenya, have a white face and black and white  
689 eyestripe. Birds from northern Tanzania southwards to Malawi and southeastern Zambia have a wholly  
690 black face [2].

691 A range of additional idiosyncratic subspecies of intermediate phenotype relative to the *cranchii*  
692 and *afer* have been described where these three forms are para/sympatric, but they lack the  
693 morphological cohesion necessary for recognition. These occur mainly in two hybrid zones between

694 *cranchii* and *afer*. One stretches from Kondoia Dodoma in central Tanzania through central Malawi  
695 into the Luangwa Valley (Fig. 8). Hybrids have well-defined streaks on the abdomen and varying  
696 amounts of chestnut and black-and-white depending on relative proximity to the respective parental  
697 forms, but show little within-locality morphological variation [2]. The second hybrid zone in northern  
698 and central Angola is characterized by morphologically relatively unstructured populations [2].

699

700 *Pternistis rufopictus* is a monotypic medium-large spurfowl (males 779-964 g., females 400-666 g.  
701 [2, 54]) distributed in dry savannas, thickets and plains from the south-eastern shores of Lake Victoria  
702 to the Wembere River in north-western Tanzania (Fig 7). It is narrowly sympatric with *P. leucoscepus*  
703 where their distribution overlaps in the southern parts of its range [2].

704 It has a red bill, orange-pink throat skin, bare red skin around the eye, and brown tarsi with 1-2  
705 spurs on males only. The eye-stripe and sides of the face are black and white. It also has a white chin  
706 stripe on either side of the bare throat. Its upper back plumage is grey-brown with dark vermiculations  
707 and dark shaft streaks, grading posteriorly to black, white and chestnut streaking. The wing coverts and  
708 feathers on the back are edged with rufous chestnut. The upper belly is grey with black shaft streaks  
709 and the lower belly is streaked black and white. The lower belly feathers have narrow central black  
710 streaks separated from rufous chestnut margins by broad buff to white streaks. *P. rufopictus* is similar  
711 to the *cranchii*-type taxa in western Tanzania, except for the white chin stripes on either side of the  
712 throat (as in *humboldtii*), and no vermiculations [2].

713 Its closest CYTB taxon is *P. afer cranchii* at 1.7% sequence divergence. Its next closest CYTB  
714 taxon is *P. leucoscepus* at 4.0%.

715

716 *Pternistis swainsonii*, is a monotypic, medium-sized spurfowl (males 400-875 g., females 340-750  
 717 g. [9]) distributed across south-western Africa from northern Namibia, eastern Botswana, Zimbabwe,  
 718 southern and eastern Zambia, southwards to north-eastern South Africa (Fig 7). It frequents  
 719 acacia/mopane savanna and tall grassland, almost anywhere where there is suitable cover. It is  
 720 especially partial to cultivated lands. Its range and numbers have increased in recent decades in the  
 721 south-eastern parts of its distribution due to agriculture-related alteration of the environment.

722 Swainson's Spurfowl [9] has a black upper mandible (lower dull orange), bare red throat skin and  
 723 black tarsi, normally with a single spur in the male. Its upperparts are grey brown with faint dark shaft-  
 724 streaking. The underparts are similar but with a grey wash on the breast and chestnut streaking lower  
 725 down. Specimens from southern Zimbabwe and northern South Africa have blackish mottling on the  
 726 abdomen. The feathers have a narrow central greyish black streak separated from greyish chestnut  
 727 margins by broad buff grey vermiculated streaks [2].

728 The closest CYTB taxon to *P. swainsonii* is *P. cranchii* at 3.6% sequence divergence.

729

## 730 Discussion

### 731 Origin of African spurfowls and 'groups'

732 The African spurfowls represent a remarkable biogeographical, morphological, behavioural and  
 733 ecological radiation within the entire African continent. The existence of a subspecies of *Pternistis*  
 734 *bicalcaratus* in Morocco, exceptional amongst Afrotropical birds [56], demonstrates relatively recent  
 735 biogeographic connectivity between North and sub-Saharan Africa.

736 African spurfowls are sister to *Ammoperdix heyi* [native range from Egypt and Israel east to  
 737 southern Arabia] and *Perdicula asiatica* [native range India, Nepal, Bangladesh, Pakistan and Sri

738 Lanka] [20], which are both arid-zone taxa [8]. The phylogenetically most basal African spurfowl,  
739 *hartlaubi*, is also a highly peculiar, desertic bird [9, 53]. Therefore, African spurfowls may have been  
740 derived from an arid-adapted taxon that dispersed from the Middle East or Asia into Africa (30-40  
741 mybp, 20] during a continent-wide arid era. Hall [2] also suggested an Asiatic origin. Within Africa,  
742 dispersal to the south may have been facilitated by an ‘Arid Corridor’ that has multiply connected the  
743 northeast arid Horn of Africa to arid Namibia and the Karoo in the southwest [57, 58, 59, 60].

744

### 745 **Montane and scaly spurfowls**

746 The Montane and Scaly spurfowls follow on from *hartlaubi* paraphyletically (Fig 2). They are  
747 probably results of invasions of, and diversification within, forested biotopes where they predominated  
748 thereafter during subsequent wetter eras. Initially, when forests subsequently contracted geographically  
749 during renewed dry eras, proto-Montane spurfowls became isolated in relictual, island-like patches of  
750 montane forest. This scenario is supported by two of the relatively basal, most isolated, western  
751 Montane taxa (*camerunensis* and *swierstrai*) being geographically most proximal to the hill/mountain-  
752 dwelling *hartlaubi*, and relatively small, sexually dimorphic, and poorly spurred.

753 The Noble Spurfowl, *P. nobilis*, this Montane taxon is geographically intermediate between western  
754 and north-eastern African Montane taxa and is sister to *camerunensis* and phylogenetically ‘links’ all  
755 of these western taxa to those in the northeast. It is also of intermediate body mass between the two  
756 species assemblages [54].

757 The divergence of Scaly spurfowls from Montane taxa is probably more a consequence of  
758 ecologically opportunistic speciation during multiple expansions and contractions of lowland forests  
759 separated by intervening savanna/steppe, hence the relatively close genetic propinquity between  
760 montane *jacksoni* and scaly *griseostriatus*, and montane *swierstrai* and scaly *squamatus*.

761 Although the core ranges of *ahantensis* and *squamatus* closely coincide with the current distribution  
 762 of present-day lowland forest, the existence of peripheral, island-like isolates suggests a much broader  
 763 continuous distribution in more widespread forest during wetter eras. Indeed, the primordial ‘scaly’  
 764 spurfowl may have been a single species distributed continuously from West Africa eastwards to the  
 765 East African coast and south to Angola, with an initial vicariance event producing *griseostriatus*. The  
 766 second major forest vicariance event and physical barrier of the Niger River may have split *ahantensis*  
 767 from *squamatus*.

768 Furthermore, vicariant ‘subspeciation’ within proto-*squamatus*, may have promoted the divergence  
 769 of *schuetti* in paleo-forest isolates in the east (Fig 4) during drier eras, as it seems to have done within  
 770 Latham’s Forest Francolin, *Afrocolinus lathamii* [Mandiwana-Neudani et al., in review] and Plumed  
 771 Guineafowl, *Guttera plumifera* [61].

772 Finally, Hall [2] noted that *squamatus* extends its range to higher altitudes on mountains  
 773 uninhabited by montane spurfowls, suggesting that competition might also limit its range.

774

## 775 **Vermiculated and Bare-throated Spurfowls**

776 Moving into relatively open arid-steppe, savanna, woodland and bush biotopes, the vicariant speciation  
 777 of Vermiculated and Bare-throated taxa was within pockets of these biotopes promoted by physical  
 778 barriers (lakes, rivers and valleys), other geomorphological events and expansion and contraction of  
 779 forest [62, 63].

780 For example, the southern Vermiculated *P. hildebrandti* and *natalensis* have similar habitats and are  
 781 separated by the valleys of the Shire and Luangwa Rivers [2]. Within the northern Vermiculated taxa,  
 782 Lake Chad probably played a similar role in speciation between proto-*bicalcaratus* and proto-  
 783 *icterorhynchus* + *clappertoni* [62]. These latter two spurfowls perhaps diverged in broad stretches of

784 arid (*clappertoni*) and mesic (*icterorhynchus*) savanna/grassland. Riverine forest along the Nile and in  
 785 Kenya/Uganda could also have separated proto-*icterorhynchus* in the north from proto-*hildebrandti* in  
 786 the south [2].

787 The initial divergence of Vermiculated taxa probably occurred in central/southern Africa with the  
 788 proto-southern taxa radiating within the region into xeric western (*adpersus* + *capensis*) and mesic  
 789 eastern (*hildebrandti* + *natalensis*) clades. Northern taxa may be a result of invasion from the south via  
 790 the ‘Arid Corridor’.

791 In sharp contrast, the northward dispersal of *bicalcaratus* from West Africa into Morocco was via a  
 792 relatively recent corridor of savanna biotope that subsequently reverted to the western Sahara.

793 With regard to Bare-throated taxa, proto-*leucoscepus* originated in arid biotopes in the north and  
 794 subsequently dispersed southwards, once again via the ‘Arid corridor’, with proto-  
 795 *cranchii/afer/swainsonii* biogeographically insinuating themselves within southern Vermiculated taxa.

796 Ecological speciation due to competition may also have contributed to speciation in Vermiculated  
 797 taxa. Those north of the equator are birds of grasslands and cultivations in woodlands, savannas and  
 798 steppe. But, south of the equator, these habitats are occupied by Bare-throated taxa, and southern  
 799 Vermiculated taxa are relegated to thickets on rocky hillsides and along rivers.

800

## 801 **Relevance of the ‘Realm’ of Tokogeny**

802 There is also evidence that tokogenetic processes may have played significant roles in the evolution of  
 803 *Pternistis* species and subspecies. Interbreeding is most apparent in the Vermiculated and Bare-  
 804 throated taxa which may continue to ‘hybridize’ in captivity or where they come into contact in nature.  
 805 For example, where *P. cranchii* and *afer* hybridize along the ‘Arid corridor’ and especially in eastern  
 806 Zambia west of the Luangwa River, south to 13°30’ and also in the Eastern Province plateau in



807 Lundazi, hybrid forms show remarkably high within-locality morphological homogeneity, forming  
808 microgeographic ‘races’. But, where *cranchii* and *afer* hybridize in southern Angola and northern  
809 Namibia, there is no such morphological homogeneity. Indeed, Roberts [64] described a ‘new species’  
810 of spurfowl, *P. cooperi*, from near Harare, Zimbabwe (Fig. 7), which turned out to be a hybrid  
811 between *cranchii* and *swainsonii*, probably due to range expansion by *swainsonii* into *cranchii* habitat  
812 which was transformed by agriculture.

813 McCarthy [29] also reports a range of spurfowl hybrids, mainly within and between Vermiculated  
814 and Bare-throated taxa: *afer* X *leucoscepus*; *afer* X *swainsonii*; *bicalcaratus* X *erckelii*; *castaneicollis*  
815 X *erckelii*; *hildebrandti* X *natalensis*; *leucoscepus* X *rufopictus*; *natalensis* X *swainsonii*; *adpersus* X  
816 *natalensis*, and *adpersus* X *swainsonii* recorded by Little [65, 66].

817 Perhaps the most interesting taxon in this regard is *P. rufopictus*, which Hall [2] speculated might  
818 have resulted from stabilized hybridization. This is because it is ‘diagnosed’ by a combination of  
819 characters of the other Bare-throated taxa (e.g. orange, rather than red or yellow facial skin) and  
820 ‘hybrid’ (vermiculated, chestnut, white and black) plumage. Genetically, it is +-4% divergent from  
821 *leucoscepus*, +-1.8% from *cranchii* and hybrids, and 2.4-3.2% from *afer*. Phylogenetically, it ‘links’  
822 *swainsonii* + *cranchii* with *afer*. Vocally, it sounds very similar to *P. leucoscepus* except that its call is  
823 much ‘faster’. The strophes of *P. leucoscepus* and *P. rufopictus* are both high-pitched, with an element  
824 of screeching and more protracted trilling [17]. Nevertheless, its specific status seems appropriate  
825 since it seems to exist partially sympatric with *leucoscepus* and *afer* without unfettered hybridization.  
826 Its putative hybrid origins remain to be tested using genomic data.

827

828

829

## 830 **Acknowledgements**

831 We acknowledge ‘Pat’ Hall’s contributions as a pioneering systematist/biogeographer and as a  
 832 generous mentor. We thank the curators and collection managers at the American Museum of Natural  
 833 History (New York), the Natural History Museum (Tring), Humboldt-Museum (Berlin), the National  
 834 Museum of Natural History - Smithsonian Institution (Washington, D.C.), the Ditsong National  
 835 Museum of Natural History (Ditsong Museums of South Africa), the Iziko Museum of Natural  
 836 History, the Natural History Museum of Zimbabwe (Bulawayo), the Field Museum of Natural History  
 837 (Chicago), Carnegie Museum of Natural History (Pittsburgh), Academy of Natural Sciences of  
 838 Philadelphia, Natural History Museum of Los Angeles County, Museum of Comparative Zoology  
 839 (Harvard University), and the Royal Museum for Central Africa (Turvuren) for access to specimens  
 840 under their care. We thank Robert Moyle for help with designing primers and Julie Feinstein for  
 841 helping with the sequencing of toe pads sub-sampled from museum skins. This project was funded by  
 842 the South African Department of Science and Technology (DST) and the National Research  
 843 Foundation (NRF) through their South African Biosystematics Initiative and Centre of Excellence  
 844 Programmes, and the African Gamebird Research, Education and Development Trust. Amy Bruce  
 845 kindly assisted with constructing the figures.

846

## 847 **References**

- 848 1. Gill, F and Donsker D (Eds). IOC World Bird List. doi: 10.14344/IOC.ML.7.2 -  
 849 <http://www.worldbirdnames.org/> - *internet only*
- 850 2. Hall BP. The francolins, a study in speciation. Bull. Br. Mus. Nat. Hist. Zool. (Natural  
 851 History). 1963. 10: 105-204.

- 852 3. Kimball RT, Braun EL, Zwartjes PW, Crowe TM., and Ligon JD. A molecular phylogeny of  
853 the pheasants and partridges suggests that these lineages are not monophyletic". *Mol.*  
854 *Phylogenet. Evol.* 1999; 11(1): 38–54.
- 855 4. Bock WJ, and Farrand J. The number of species and genera of recent birds. *American Museum*  
856 *Novitates.* 1980; 2703, 29 pp.
- 857 5. Milstein P le S, and Wolff SW. The over-simplification of our “francolins”. *S. Afr. J. Wild.*  
858 *Res. Supplement 1,* 1987; 58-65.
- 859 6. Crowe TM, and Little RM. Francolins, partridges and spurfowls: what’s in a name? *Ostrich.*  
860 2004; 75: 199-203.
- 861 7. Johnsgard PA. *The Quails, Partridges, and Francolins of the World.* Oxford University Press,  
862 Oxford. 1988.
- 863 8. Madge S, and McGowan P. *Pheasants, Partridges, and Grouse: A Guide to the Pheasants,*  
864 *Partridges, Quails, Grouse, Guineafowl, Buttonquails, and Sandgrouse of the world.* Princeton  
865 *Univ. Press, Princeton, N.J.* 2002.
- 866 9. Little R and Crowe T. *Gamebirds of southern Africa.* 2nd edition. Cape Town: Random House  
867 *Struik.* 2011. Pp 135.
- 868 10. Sibley CG, and Monroe Jr BL. *Distribution and Taxonomy of Birds of the World.* Yale  
869 *University Press, New Haven.* 1990.
- 870 11. del Hoyo J, Elliott A, and Sargatal J. *Handbook of the Birds of the World: New world*  
871 *Vultures to Guineafowl.* Lynx edicions, Barcelona. 1994; Vol. II.
- 872 12. Roberts A. Synoptic check list of the birds of South Africa. *Ann. Transvaal Mus.* Vol. X. South  
873 *Africa.* 1924.
- 874 13. Roberts A. *The Birds of South Africa.* 1<sup>st</sup> ed. Riverside Pres. Edinburgh. 1940.

- 875 14. Wolters HE. Die Vogelarten der Erde. Paul Parey, Hamburg and Berlin. 1972-82.
- 876 15. Mandiwana-Neudani TG, Kopuchian C, Louw G, and Crowe TM. A study of gross  
877 morphological and histological syringeal features of true francolins (Galliformes: *Francolinus*,  
878 *Scleroptila*, *Peliperdix* and *Dendroperdix* spp.) and spurfowls (*Pternistis* spp.) in a  
879 phylogenetic context. Ostrich. 2011; 82: 115-127.
- 880 16. van Niekerk JH, and Mandiwana-Neudani TG. The phylogeny of francolins (*Francolinus*,  
881 *Dendroperdix*, *Peliperdix* and *Scleroptila*) and spurfowls (*Pternistis*) based on chick plumage  
882 (Galliformes: Phasianidae. Avian Research 2018; 9:2.
- 883 17. Mandiwana-Neudani TG, Bowie RCK, Hausberger M, Henry L, and Crowe TM. Taxonomic  
884 and phylogenetic utility of variation in advertising calls of francolins and spurfowls  
885 (Galliformes: Phasianidae). Afr. Zool. 2014; 49: 54-82.
- 886 18. van Niekerk JH. Vocal structure, behavior and partitioning of all 23 *Pternistis* spp. into  
887 homologous sound (and monophyletic) groups. Chinese Birds. 2013; 4(3): 210–231. DOI  
888 10.5122/cbirds.2013.0020
- 889 19. Bloomer P, and Crowe TM. Francolin phylogenetics: molecular, morphobehavioral, and  
890 combined evidence. Molecular Phylogenetics and Evolution. 1998; 9(2): 236-254.
- 891 20. Crowe TM, Bowie RCK, Bloomer P, Mandiwana TG, Hedderson TAJ, Randi E, et al.  
892 Phylogenetics, biogeography and classification of, and character evolution in, gamebirds  
893 (Aves: Galliformes): Effects of character exclusion, data partitioning and missing data.  
894 Cladistics. 2006; 22: 1-38.
- 895 21. Chapin JP. A new genus *Acentrotyx* proposed for *Francolinus nahani* Dubois. The Auk. 1926;  
896 43: 235.

- 897 22. Cohen C, Wakeling J L, Mandiwana-Neudani TG, Sande E, Dranzoa C, Crowe TM, et al.  
898 Phylogenetic affinities of evolutionarily enigmatic African galliforms: the Stone Partridge  
899 *Ptilopachus petrosus* and Nahan's Francolin *Francolinus nahani*, and support for their sister  
900 relationship with New World quails. *Ibis*. 2012; 154: 768-780.
- 901 23. Bowie RCK, Cohen C, and Crowe TM. Ptilopachinae: a new subfamily of the Odontophoridae  
902 (Aves: Galliformes). *Zootaxa*. 2013; 3670: 097-098.
- 903 24. Zachos FE. Species Concepts in Biology. Historical Development, Theoretical Foundations  
904 and Practical Relevance. *Springer International Publishing Switzerland, [place not stated]*. 2016.
- 905 25. Winker K. Chapter 1: Subspecies represent geographically partitioned variation, a gold mine of  
906 evolutionary biology, and a challenge for conservation. **Ornithol. Monogr.** 2010; 67: 6–23.
- 907 26. De Queiroz K. Species concepts and species delimitation. *Syst Biol.* 2007; 56(6): 879-886.
- 908 27. Linder HP, de Klerk HM, Born J, Burgess ND, Fjeldså J, and Rahbek C. The partitioning of  
909 Africa: statistically defined biogeographical regions in sub-Saharan Africa. *J. Biogeogr.* 2014;  
910 39: 1189-1205.
- 911 28. Pruett CL, and Winker T. Alaska song sparrows (*Melospiza melodia*) demonstrate that genetic  
912 marker and method of analysis matter in subspecies assessments. *The American Ornithologists'*  
913 *Union*. 2010; 67: 162-171.
- 914 29. McCarthy EM. Handbook of avian hybrids of the world. Oxford University Press, New York.  
915 2006.
- 916 30. Casacci LP, Barbero F, and Balletto E. The “Evolutionarily Significant Unit” concept and its  
917 applicability in biological conservation. *Italian Journal of Zoology*. 2014; 81 (2): 182-193.  
918 <https://doi.org/10.1080/11250003.2013.870240>

- 919 31. Crowe TM , Essop MF, Allan DG, Brooke RK, and Komen J. Overlooked units of  
920 comparative and conservation biology: the Black Korhaan *Eupodotis afra* (Otididae) as a case  
921 study. *Ibis*. 1994; 136: 166-175.
- 922 32. Mallet J. Hybridization as an invasion of the genome. **Trends Ecol. Evol.** 2005; 20: 229-237.
- 923 33. Mallet J. Hybridization, ecological races and the nature of species: empirical evidence for the  
924 ease of speciation. *Philosophical Transactions of the Royal Society B: Biological Sciences*.  
925 2008; 363: 2971-2986.
- 926 34. Crowe TM. The evolution of guinea-fowl (Galliformes, Phasianidae, Numidinae) taxonomy,  
927 phylogeny, speciation and biogeography. *Annals of the South African Museum*. 1978; 76: 43-  
928 136.
- 929 35. Bowie RCK, Fjeldså J, Kiure J, and Kristensen J. A new member of the greater double-  
930 collared sunbird complex (Passeriformes: Nectariniidae) from the Eastern Arc Mountains of  
931 Africa. *Zootaxa*. 2016; 4175: 23-43.
- 932 36. Crowe TM, Harley EH , Jakutowicz MB, Komen J, and Crowe AA. Phylogenetic,  
933 taxonomic and biogeographical implications of genetic, morphological, and behavioural  
934 variation in francolins (Phasianidae. *Francolinus*). *Auk*.1992; 109(1): 24-42.
- 935 37. Edwards SV, and Wilson AC. Phylogenetically informative length polymorphism and  
936 sequence variability in mitochondrial DNA of Australian songbirds (*Pomatostomus*). *Genetics*.  
937 1990; 126: 695-711.
- 938 38. Fumihito A, Miyake T, Takada M, Ohno S, and Kondo N. The genetic link between the  
939 Chinese bamboo partridge (*Bambusicola thoracica*) and the chicken and junglefowls of the  
940 genus *Gallus*. *Proceedings of the National Academy of Sciences of the United States of*  
941 *America*. 1995; 92: 11053–11056.

- 942 39. Mowm T, Johansen S, Erikstad KE, and Piatt JF. Phylogeny and evolution of the auks  
943 (subfamily Alcinae) based on mitochondrial DNA sequences. *Proceedings of the National*  
944 *Academy of Sciences of the United States of America.* 1994; 91: 7912-7916.
- 945 40. Sorenson MD, Ast JC, Dimcheff DE, Yuri T, and Mindell DP. Primers for a PCR-based  
946 approach to mitochondrial genome sequencing in birds and other vertebrates. *Mol. Phylogenet.*  
947 *Evol.* 1999; 12: 105-114.
- 948 41. Armstrong MH, Braun EL, and Kimball RT. Phylogenetic utility of avian ovomucoid intron G:  
949 a comparison of nuclear and mitochondrial phylogenetics in Galliformes. *Auk.* 2001; 118: 799-  
950 804.
- 951 42. Friesen VL, Congdon BC, Walsh HE, and Birt TP. Intron variation in Marbled Murrelets  
952 detected using analyses of single-stranded conformation polymorphisms. *Mol. Ecol.* 1997; 6:  
953 1047-1058.
- 954 43. Primmer CR, Borge T, Lindell J, and Saetre GP. Single nucleotide polymorphism  
955 characterization in species with limited available sequence information: high nucleotide  
956 diversity revealed in the avian genome. *Mol. Ecol.* 2002; 11: 603-612.
- 957 44. Kornegay JR, Kocher TD, Williams LA, and Wilson AC. Pathways of lysozyme evolution  
958 inferred from the sequences of cytochrome b in birds. *J. Mol. Evol.* 1993; 37: 367-379.
- 959 45. Edwards SV, Arctander P, and Wilson AC. Mitochondrial resolution of a deep branch in the  
960 genealogical tree for perching birds. *Proceedings of the Royal Society.* 1991; 243: 99-107.
- 961 46. Hennig W. *Phylogenetic Systematics*, translated by D. Davis and R. Zangerl, Urbana:  
962 University of Illinois Press, 1966 (reprinted 1979).
- 963 47. Kluge AG. Total evidence or taxonomic congruence: cladistics or consensus classification.  
964 *Cladistics.* 1998; 14: 151-158.

- 965 48. Nixon KC, and Carpenter J M. On simultaneous analysis. *Cladistics*.1996, 12: 221-241.
- 966 49. Farris JS. The logical basis of phylogenetic analysis. In Platnick, Norman I.; Funk,  
967 Vicki. *Advances in cladistics*, vol. 2, Columbia University Press, New York, 1983; pp 7–36.
- 968 50. Rindal E, Brower AVZ. Do model-based phylogenetic analyses perform better than  
969 parsimony? A test with empirical data. *Cladistics*. 2011; 27: 1-4.
- 970 51. Snow DW. *An Atlas of Speciation in African Non-passerine birds*. London: British Museum.  
971 1978.
- 972 52. Harrison JA, Allan DG, Underhill LG, Herremans M, Tree A J, Parker V, et al. *The Atlas of*  
973 *Southern African Birds: Non-passerines*. Vol. 1. Johannesburg: BirdLife South Africa. 1997.
- 974 53. Komen J. Preliminary observations of the social pattern, behaviour and vocalisations of  
975 Hartlaub’s Francolin. *S. Afr. J. Wildl. Res.* 1987; 1: 82–86.
- 976 54. Little R. *Terrestrial Gamebirds and Snipes of Africa*. Jacana Media, Johannesburg, South  
977 Africa. 2016a. pp 301.
- 978 55. Töpfer T, Podsiadlowski L, and Gedeon K. Rediscovery of the Black-fronted Francolin  
979 *Pternistis (castaneicollis) atrifrons* (Conover, 1930) (Aves: Galliformes: Phasianidae) with  
980 notes on biology, taxonomy and conservation. *Vertebrate Zoology*. 2014; 64: 261-271.
- 981 56. Moreau, RE. *The bird faunas of Africa and its islands*. New. York and London, Academic  
982 Press. 424 pages. 1966.
- 983 57. Balinsky BI. Patterns of animal distribution on the: African continent. *Ann. Cape Prov. Mus.*  
984 1962; 2: 299-310.
- 985 58. Bobe R. The evolution of arid ecosystems in eastern Africa. *J. Arid Environ.* 2006, 66: 564–  
986 584.



- 987 59. Vernon CJ. Biogeography, endemism and diversity of animals in the Karoo. In Dean, W.R.J.  
988 and Milton, S.J. editors. The Karoo. Ecological patterns and processes. Cambridge University  
989 Press, Cambridge. 1999; 57-78.
- 990 60. Irwin MPS, Benson CW, and White CMN. The significance of valleys as avian  
991 zoogeographical barriers. Ann. Cape Prov. Mus. 1962; 2: 155-189.
- 992 61. Crowe TM, and Crowe A A. The genus *Francolinus* as a model for avian evolution and  
993 biogeography in Africa. Pp. 207-231. In: Proceedings of the International Symposium on  
994 African vertebrates (Schuchmann KL, ed.). Museum Alexander Koenig, Bonn. 1985.
- 995 62. Crowe TM and Crowe AA. Patterns of distribution, diversity and endemism in Afrotropical  
996 birds. London. J. Zool. 1982; 198: 417-442.
- 997 63. Cotterill FPD. Geomorphological influences on vicariant evolution in some African mammals  
998 in the Zambezi basin: some lessons for conservation. In: Ecology and Conservation of Small  
999 Antelope. Proceedings of an International Symposium on Duiker and Dwarf Antelope in  
1000 Africa, Chapter: Geomorphological influences on vicariant evolution in some African  
1001 mammals in the Zambezi basin: some lessons for conservation, Publisher: Filander Verlag,  
1002 Fürth, Editors: A. Plowman. 2003; 11-58.
- 1003 64. Roberts AA. New species of *Pternistis* from Salisbury, Rhodesia. Ostrich. 1947; 18(2): 197.
- 1004 65. Little R. Hybrid spurfowl unravelled. *African Birdlife Letters* November/December. 2016b;  
1005 5(1): 6-8.
- 1006 66. Little R. Mix & match Hybrid spurfowl. *African Birdlife News & Views* July/August. 2016c;  
1007 4(5): 16.
- 1008

1009 **Appendix 1. Spurfowl taxa examined and, where relevant, Genbank accession numbers for taxa**  
 1010 **sequenced for different molecular markers.**

| Taxon                       | GenBank accession numbers |          |                |          |
|-----------------------------|---------------------------|----------|----------------|----------|
|                             | CYTB                      | 12S      | Control region | ND2      |
| <i>Pternistis hartlaubi</i> | FR691618                  | FR691555 | FR716656       | FR691572 |
| <i>P. h. crypticus</i>      | FR691619                  |          |                |          |
| <i>P. adspersus</i>         | FR691623                  | DQ832113 | FR691381       | DQ768276 |
| <i>P. a. kalahari</i>       |                           |          |                |          |
| <i>P. afer</i> Angola       | FR694158                  |          |                | FR691579 |
| <i>P. a. benguellensis</i>  | FR694159                  |          |                |          |
| <i>P. a. itigi</i>          |                           |          |                |          |
| <i>P. a. bohmi</i>          | FR694162                  |          |                |          |
| <i>P. cranchii cranchii</i> | FR694164                  |          |                |          |
| <i>P. afer cunenensis</i>   | FR694160                  |          |                |          |
| <i>P. a. harterti</i>       | FR694161                  |          |                |          |
| <i>P. a. intercedens</i>    | FR694165                  |          |                |          |
| <i>P. a. itigi</i>          | FR694166                  |          |                |          |
| <i>P. a. nudicollis</i>     | FR694163                  |          |                |          |
| <i>P. a. nyanzae</i>        | FR694167                  |          |                |          |
| <i>P. a.</i> South Africa   | AM236908                  | DQ832111 | DQ834533       | DQ768280 |
| <i>P. a. swynnertoni</i>    | FR694168                  |          |                |          |
| <i>P. a. humboldti</i>      |                           |          |                |          |
| <i>P. a. melanogaster</i>   | FR691624                  | FR691551 | FR691370       | FR691578 |

*P.a. castaneiventer*

*P.a. krebsi*

*P.a. notatus*

*P. bicalcaratus bicalcaratus*

*P. b. adamauae* FR691626

*P. b. ayesha* FR691625

*P. b. thornei* FR691627

*P. b. ogilviegranti*

*P. camerunensis* FR691591 FR691552 FR691382 FR691577

*P. capensis* AM236909 DQ832112 DQ834534 DQ768282

*P. castaneicollis* AM236903

*P. c. bottega* FR691629

*P. c. ogoensis* FR691628

*P. c. gofanus*

*P.c. kaffanus*

*P. clappertoni* FR691602 FR716655 FR691383 FR691576

*P. c. nigrosquamatus* FR691604

*P. c. sharpii* FR691603

*P. erckelii* FR691589 FR691553 FR691575

*P. griseostriatus* AM236905 FR691554 FR691384 DQ768284

*P. harwoodi* FR691600

*P. hildebrandti* FR691595 FR691385

|                                   |          |          |          |          |
|-----------------------------------|----------|----------|----------|----------|
| <i>P. h. altumi</i>               | FR691597 |          |          |          |
| <i>P. h. fischeri</i>             | FR691598 |          |          |          |
| <i>P. h. helleri</i>              | FR691599 |          |          |          |
| <i>P. h. johnstoni</i>            | FR691596 |          |          |          |
| <i>P. icterorhynchus</i>          | FR691601 |          |          |          |
| <i>P. i. griseescens</i>          |          |          |          |          |
| <i>P.i. emini</i>                 |          |          |          |          |
| <i>P. i. ugandensis</i>           |          |          |          |          |
| <i>P. i. dybowskii</i>            |          |          |          |          |
| <i>P. jacksoni</i>                | FR691594 |          |          |          |
| <i>P. leucoscepus</i>             | AM236906 | FR691556 | FR691387 | DQ768283 |
| <i>P. l. infuscatus</i>           | FR691587 |          |          |          |
| <i>P. l. muhamed-ben-abdullah</i> | FR691586 |          |          |          |
| <i>P. l. holtemulleri</i>         |          |          |          |          |
| <i>P. natalensis</i>              | AM236911 | FR691557 | DQ834536 | DQ768285 |
| <i>P. n. thamnobium</i>           |          |          |          |          |
| <i>P. nobilis</i>                 | FR691592 |          |          |          |
| <i>P. ochropectus</i>             | FR691590 |          |          |          |
| <i>P. rufopictus</i>              | FR691588 |          |          |          |
| <i>P. squamatus</i>               | AM236904 | DQ832109 | FR691388 | DQ768286 |
| <i>P. s. maranensis</i>           | FR691630 |          |          |          |
| <i>P. s. schuettii</i>            | FR691631 |          |          |          |
| <i>P. s. tetraoninus</i>          | AM236907 | DQ832110 | DQ834532 | DQ768287 |

*P. s. zappeyi*

*P. swainsonii*

*P. s. chobiensis* FR694170

*P. s. lundazi* FR694169

*P. swierstrai* FR691593

*P. cl. cavei*

*P. cl. gedgii*

---

1011

1012

1013 **Appendix 2. Revised classification and common names for spurfowls based on multiple lines of**  
 1014 **evidence presented in this study.** Family: Phasianidae; sub-family: Coturnicinae

| Genus, species, subspecies              | Common names            |
|-----------------------------------------|-------------------------|
| Genus: <i>Pternistis</i>                |                         |
| <i>P. hartlaubi</i>                     | Hartlaub's Spurfowl     |
| <i>P. camerunensis</i>                  | Mount Cameroon Spurfowl |
| <i>P. nobilis</i>                       | Handsome Spurfowl       |
| <i>P. swierstrai</i>                    | Swierstra's Spurfowl    |
| <i>P. erckelii</i>                      | Djibouti Spurfowl       |
| <i>P. ochropectus</i>                   | Djibouti Spurfowl       |
| <i>P. castaneicollis castaneicollis</i> | Chestnut-naped Spurfowl |
| <i>P. c. atrifrons</i>                  | Black-fronted Spurfowl  |
| <i>P. jacksoni</i>                      | Jackson's Spurfowl      |
| <i>P. squamatus</i>                     | Scaly Spurfowl          |
| <i>P. schuetti schuettii</i>            | Schuett's Spurfowl      |
| <i>P. s. maranensis</i>                 |                         |
| <i>P. ahantensis</i>                    | Ahanta Spurfowl         |
| <i>P. griseostriatus</i>                | Grey-striped Spurfowl   |
| <i>P. hildebrandti hildebrandti</i>     | Hildebrandt's Spurfowl  |
| <i>P. h. fischeri</i>                   |                         |
| <i>P. natalensis</i>                    | Natal Spurfowl          |
| <i>P. adpersus</i>                      | Red-billed Spurfowl     |
| <i>P. capensis</i>                      | Cape Spurfowl           |

|                                     |                         |
|-------------------------------------|-------------------------|
| <i>P. icterorhynchus</i>            | Heuglin's Spurfowl      |
| <i>P. bicalcaratus bicalcaratus</i> | Double-spurred Spurfowl |
| <i>P. b. ayesha</i>                 | Moroccan Spurfowl       |
| <i>P. b. adamauae</i>               |                         |
| <i>P. harwoodi</i>                  | Harwood's Spurfowl      |
| <i>P. clappertoni clappertoni</i>   | Clapperton's Spurfowl   |
| <i>P. c. sharpii</i>                |                         |
| <i>P. leucoscepus leucoscepus</i>   | Yellow-necked Spurfowl  |
| <i>P. l. infuscatus</i>             |                         |
| <i>P. swainsonii</i>                | Swainson's Spurfowl     |
| <i>P. cranchii</i> *                | Cranch's Spurfowl       |
| <i>P. rufopictus</i>                | Grey-breasted Spurfowl  |
| <i>P. afer afer</i>                 | Red-necked Spurfowl     |
| <i>P. a. castaneiventer</i>         |                         |
| <i>P. a. humboldtii</i>             |                         |

---

\* subspecies elevated to species

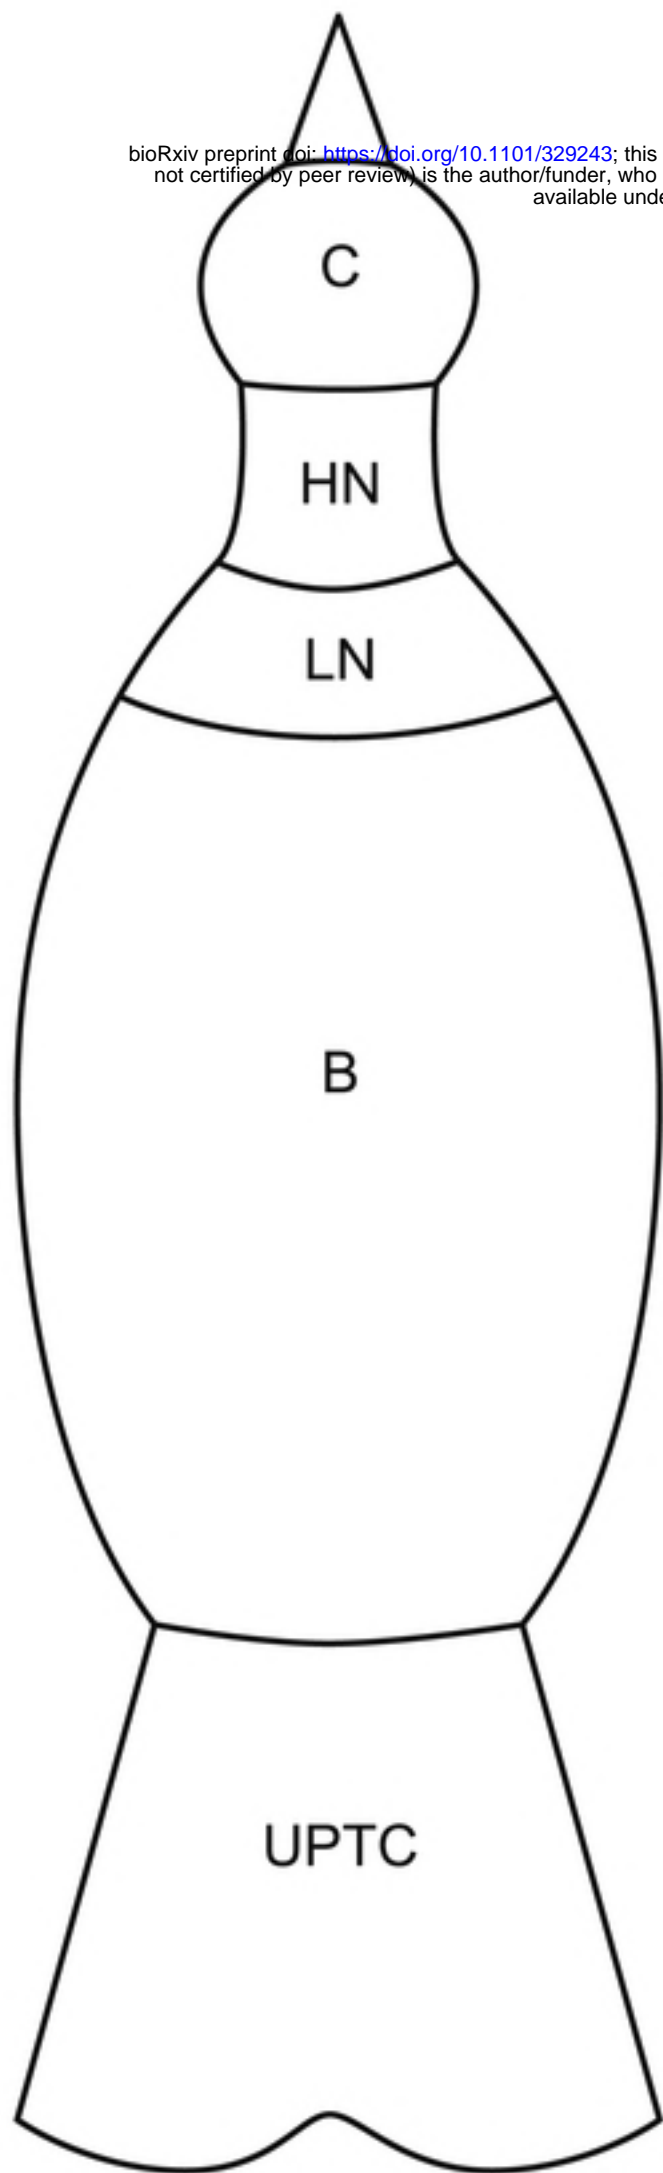

DORSAL

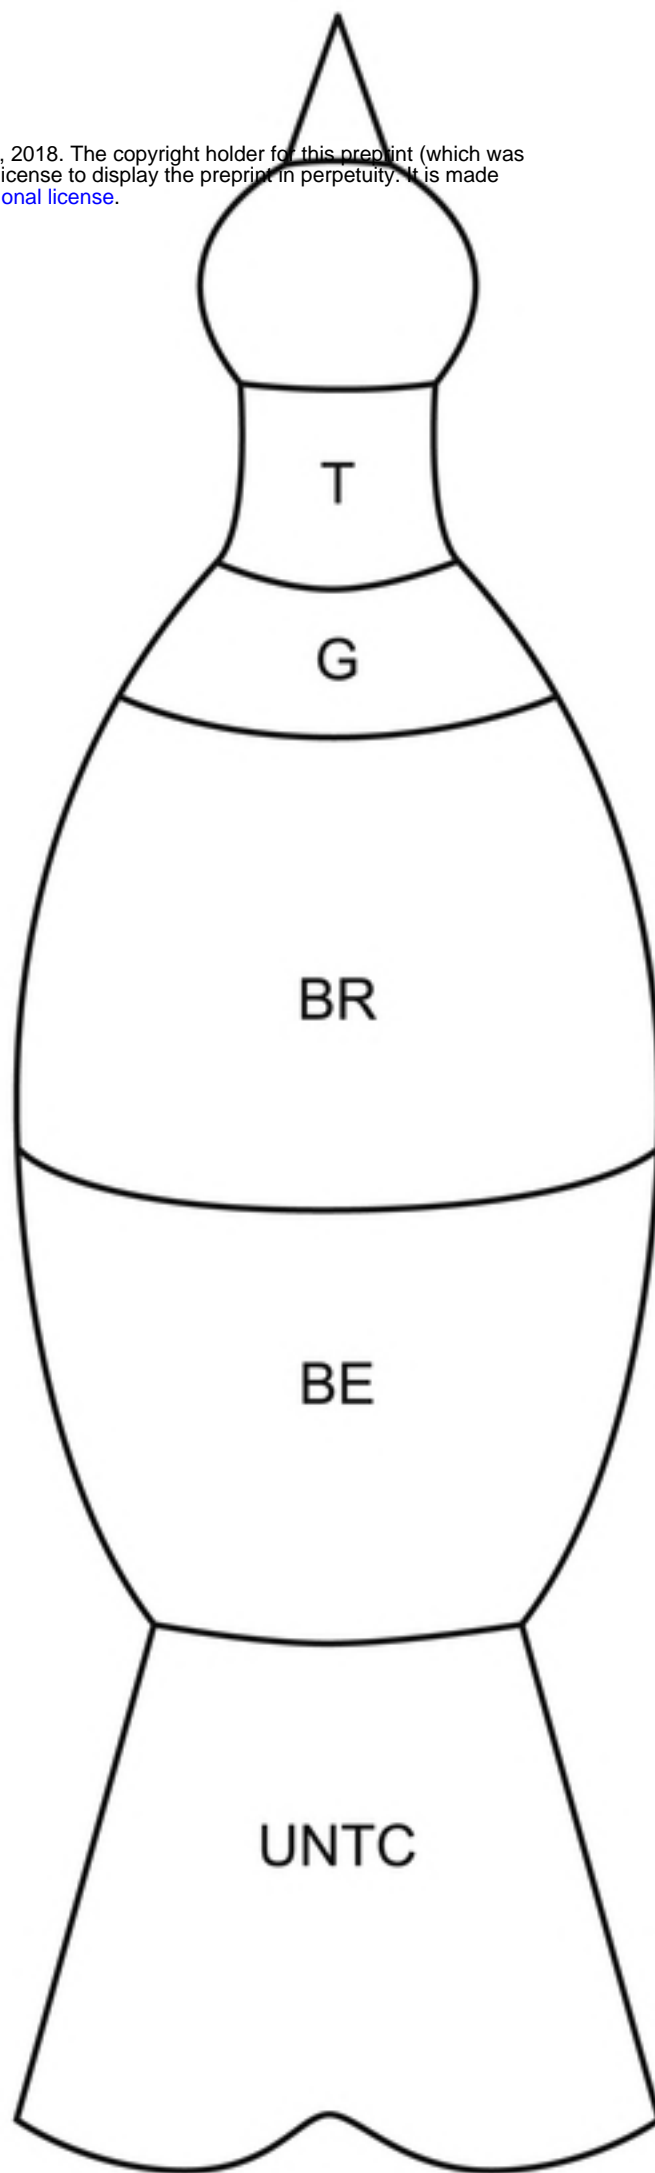

VENTRAL

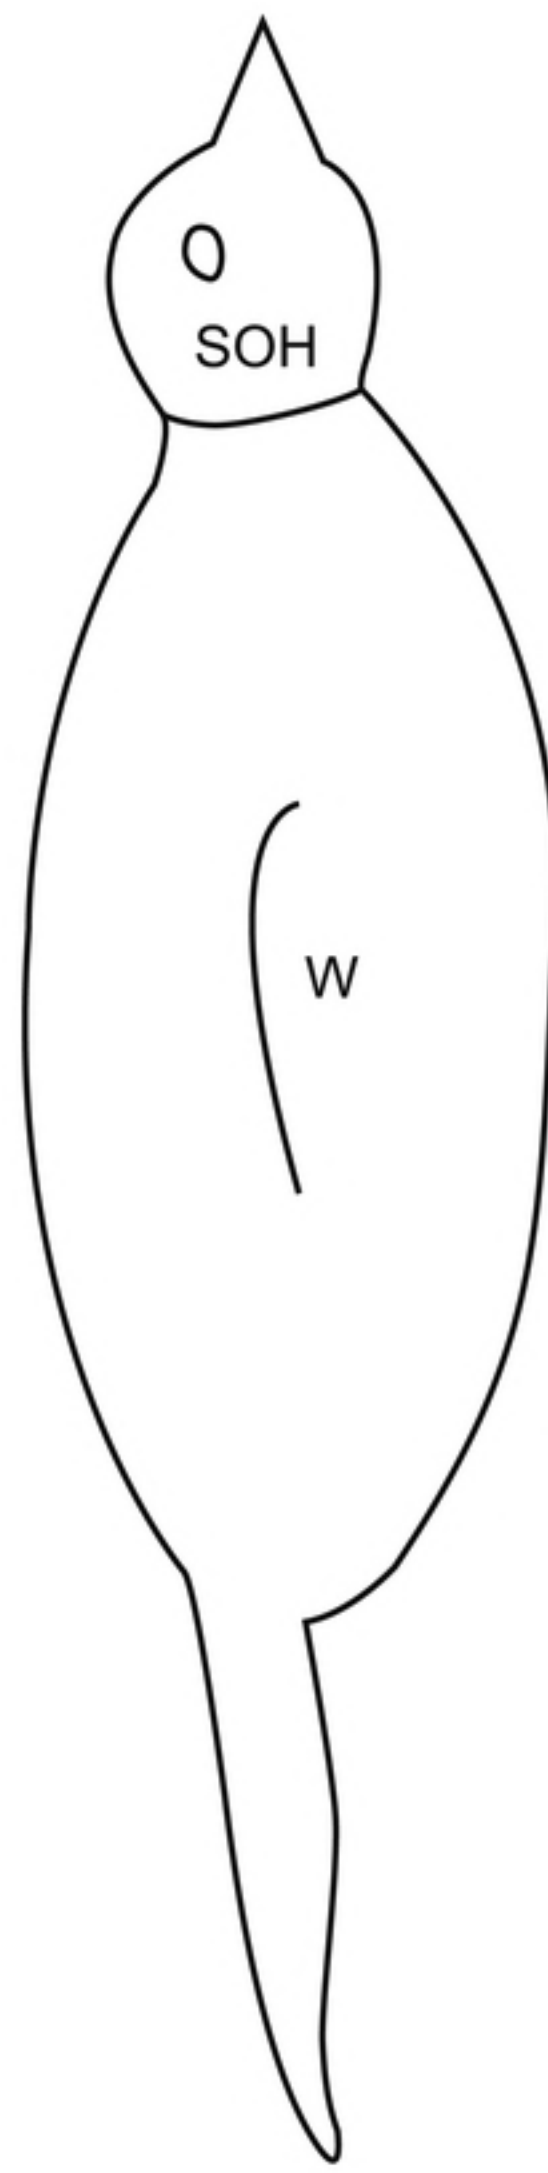

LATERAL



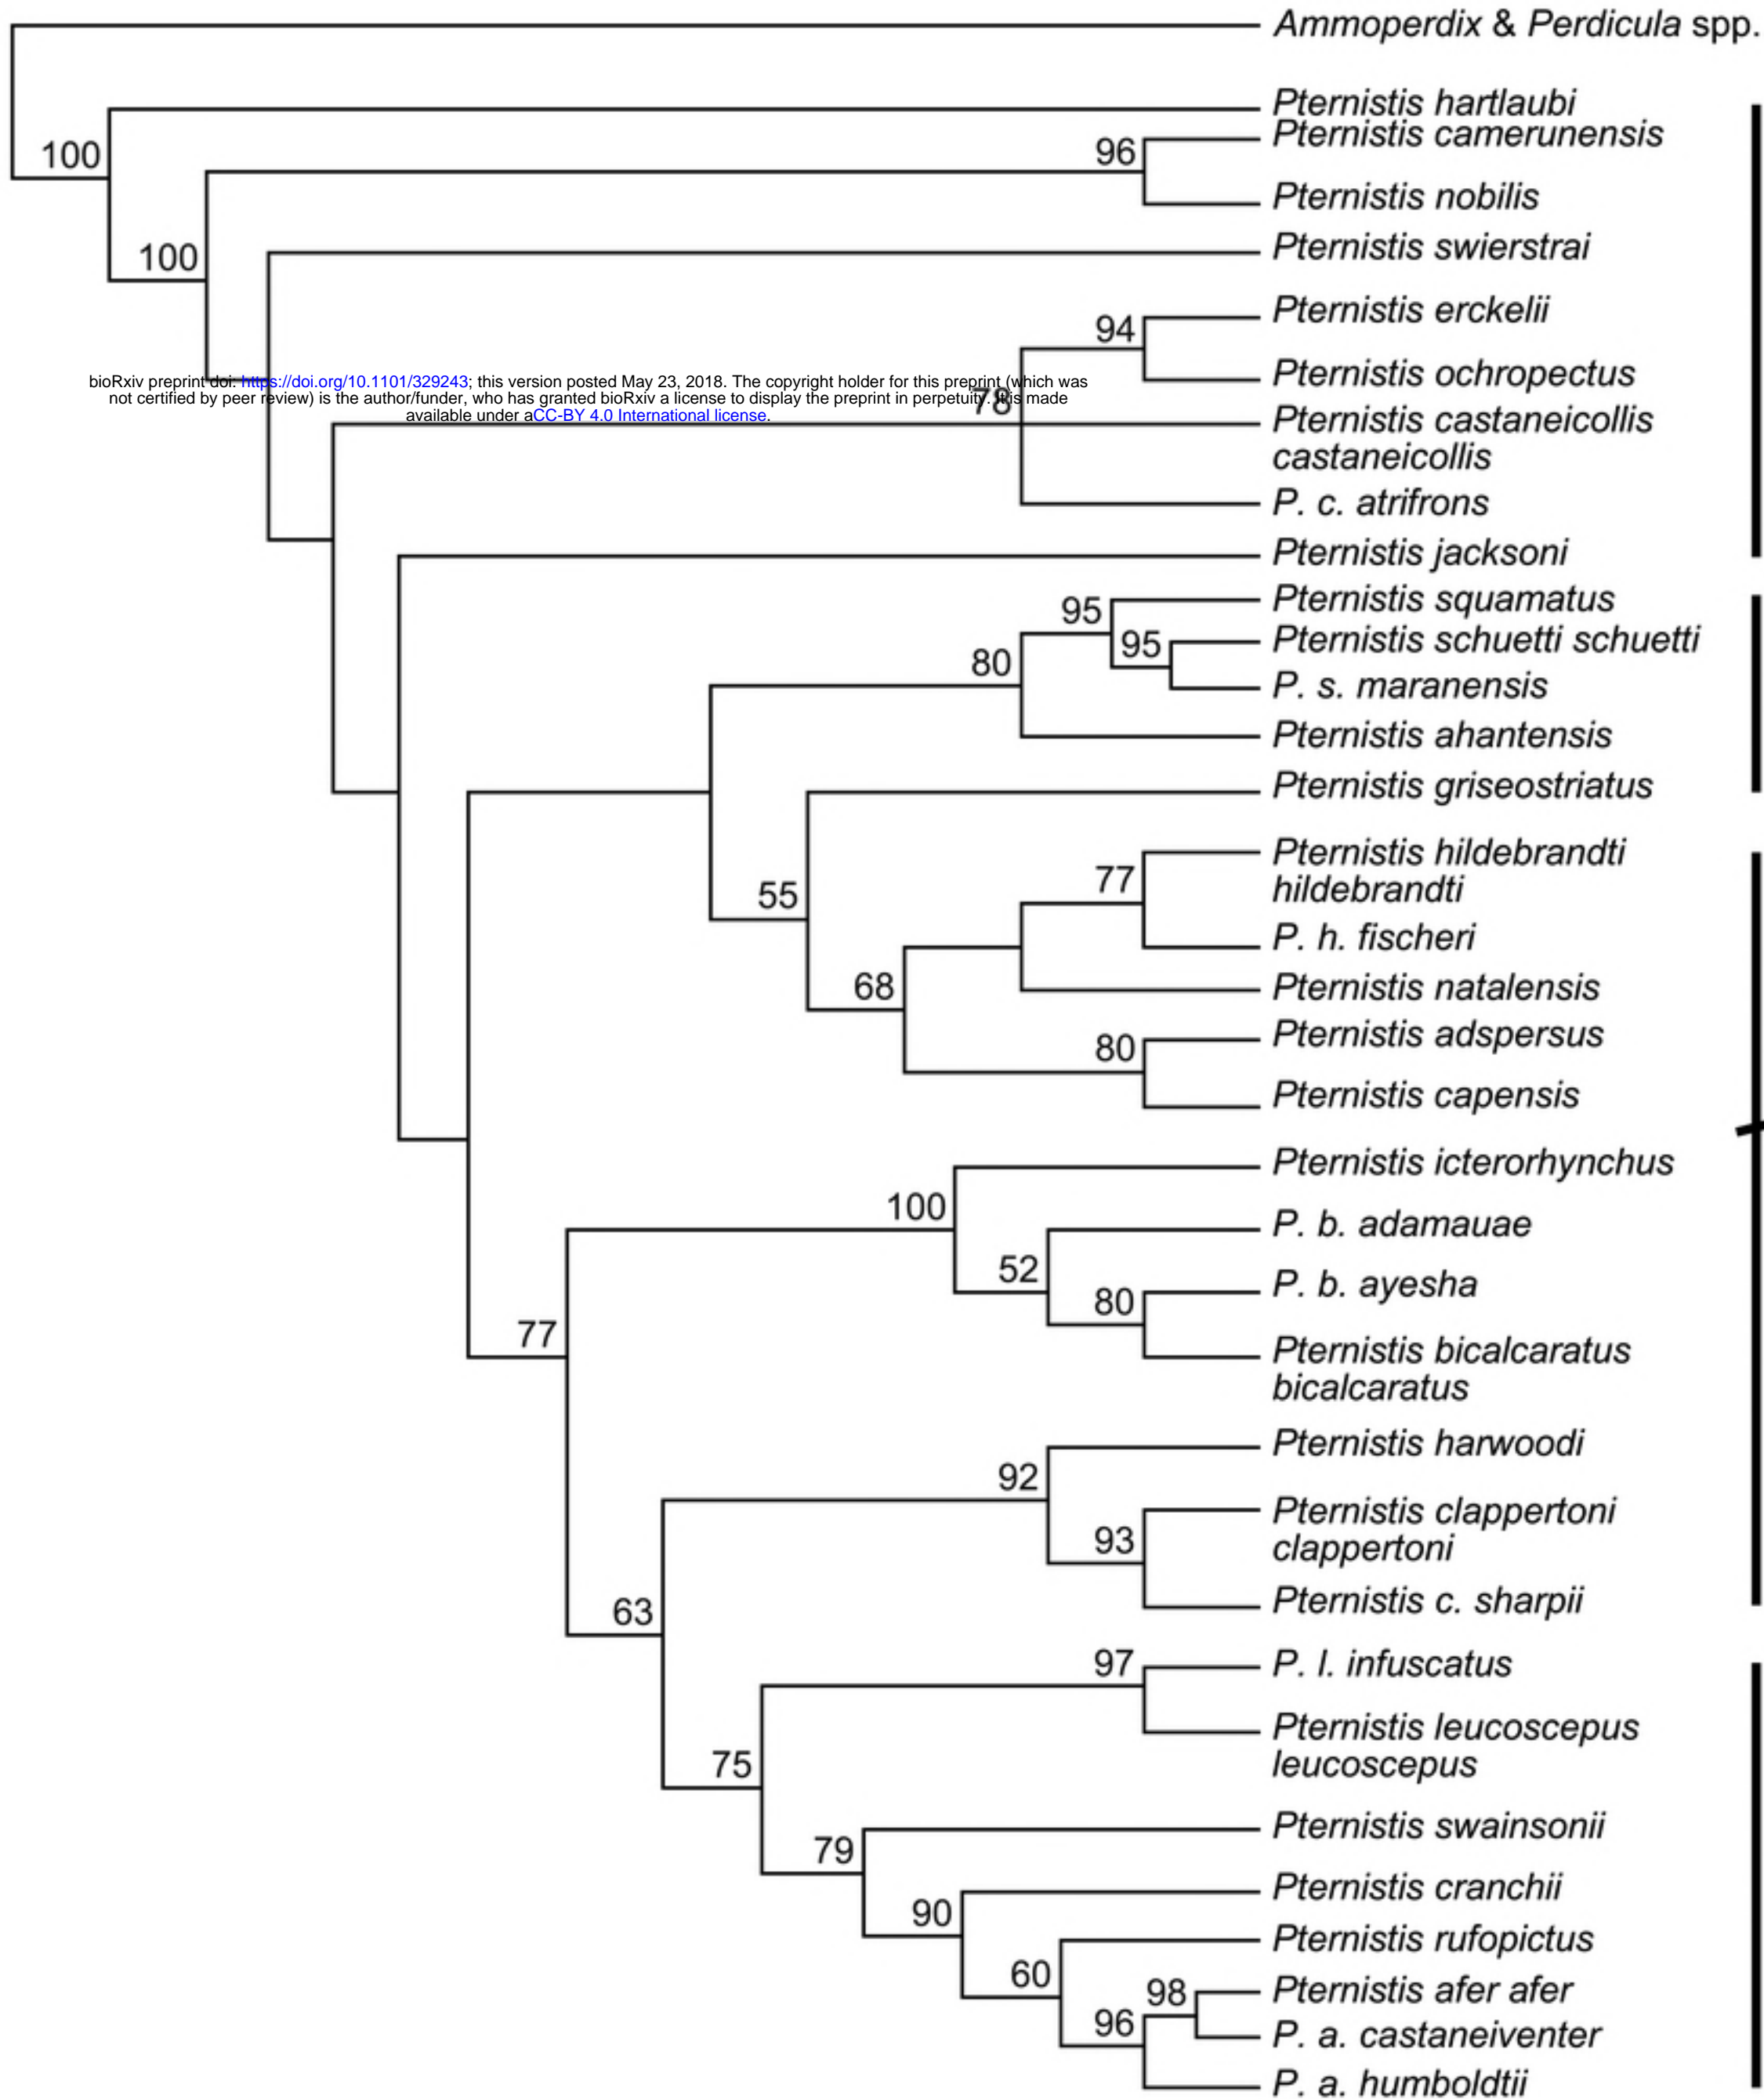

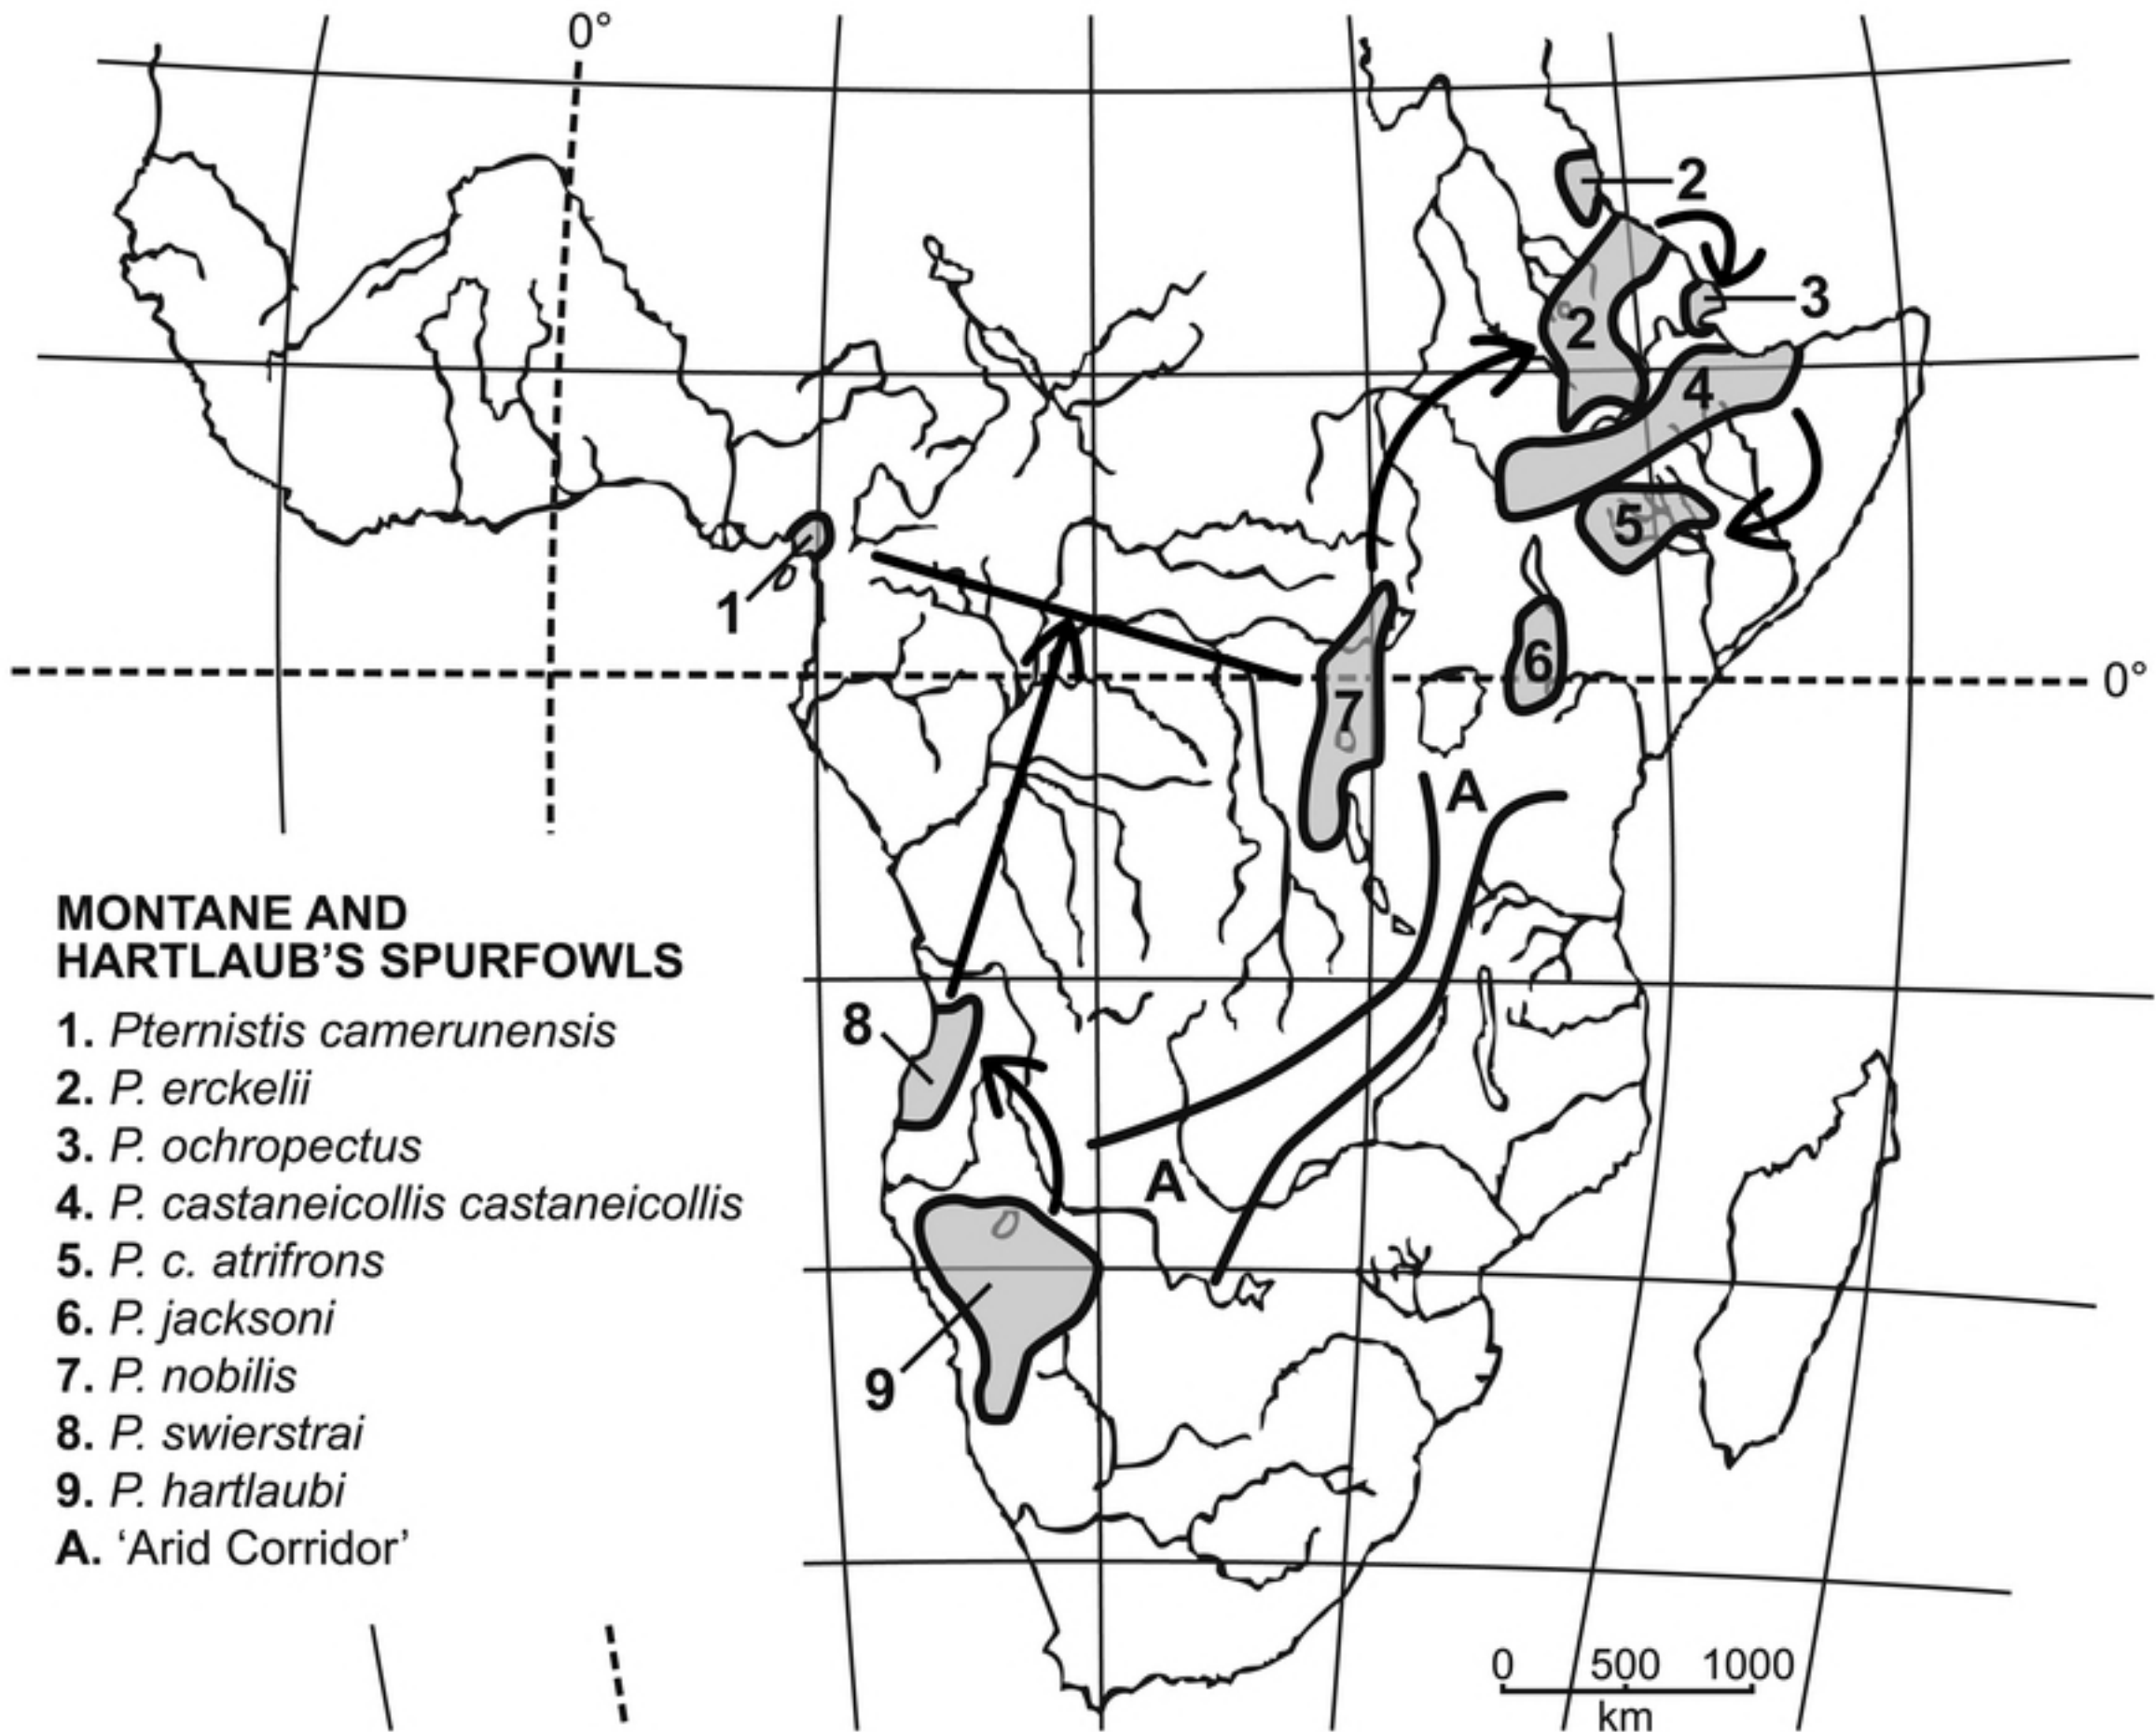

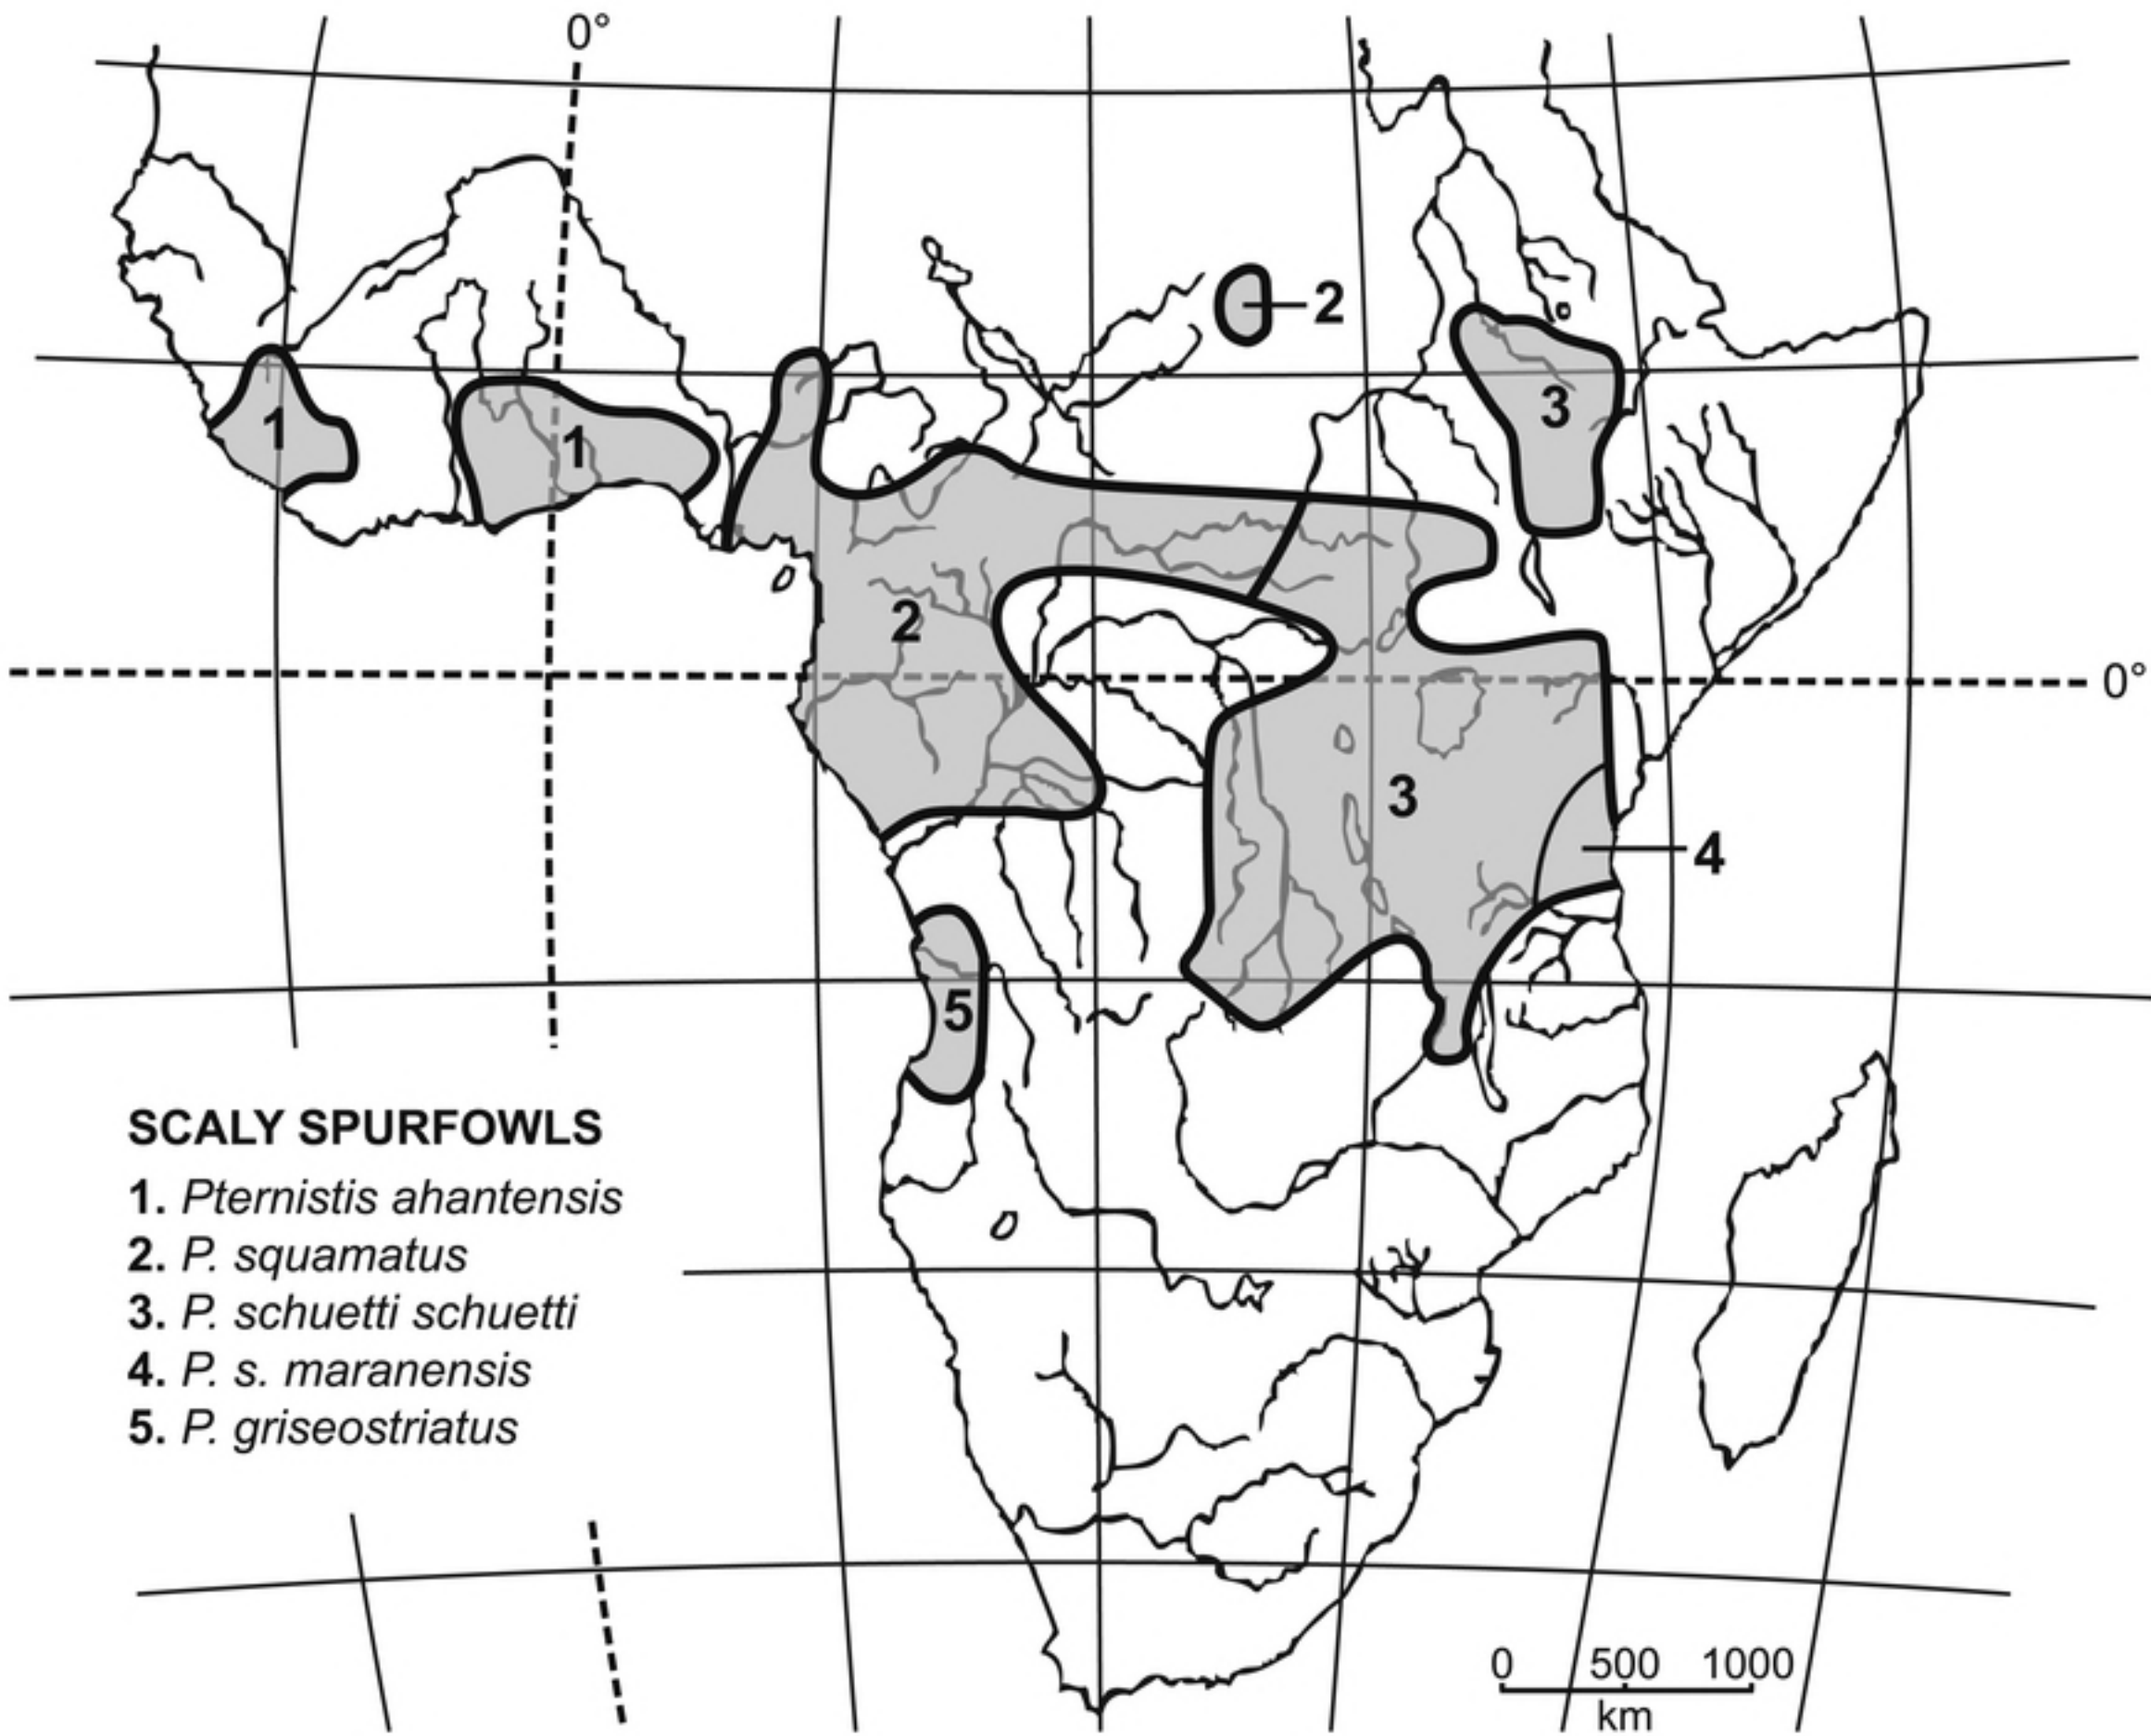

**SCALY SPURFOWLS**

- 1. *Pternistis achantensis*
- 2. *P. squamatus*
- 3. *P. schuetti schuetti*
- 4. *P. s. maranensis*
- 5. *P. griseostriatus*

0 500 1000  
km

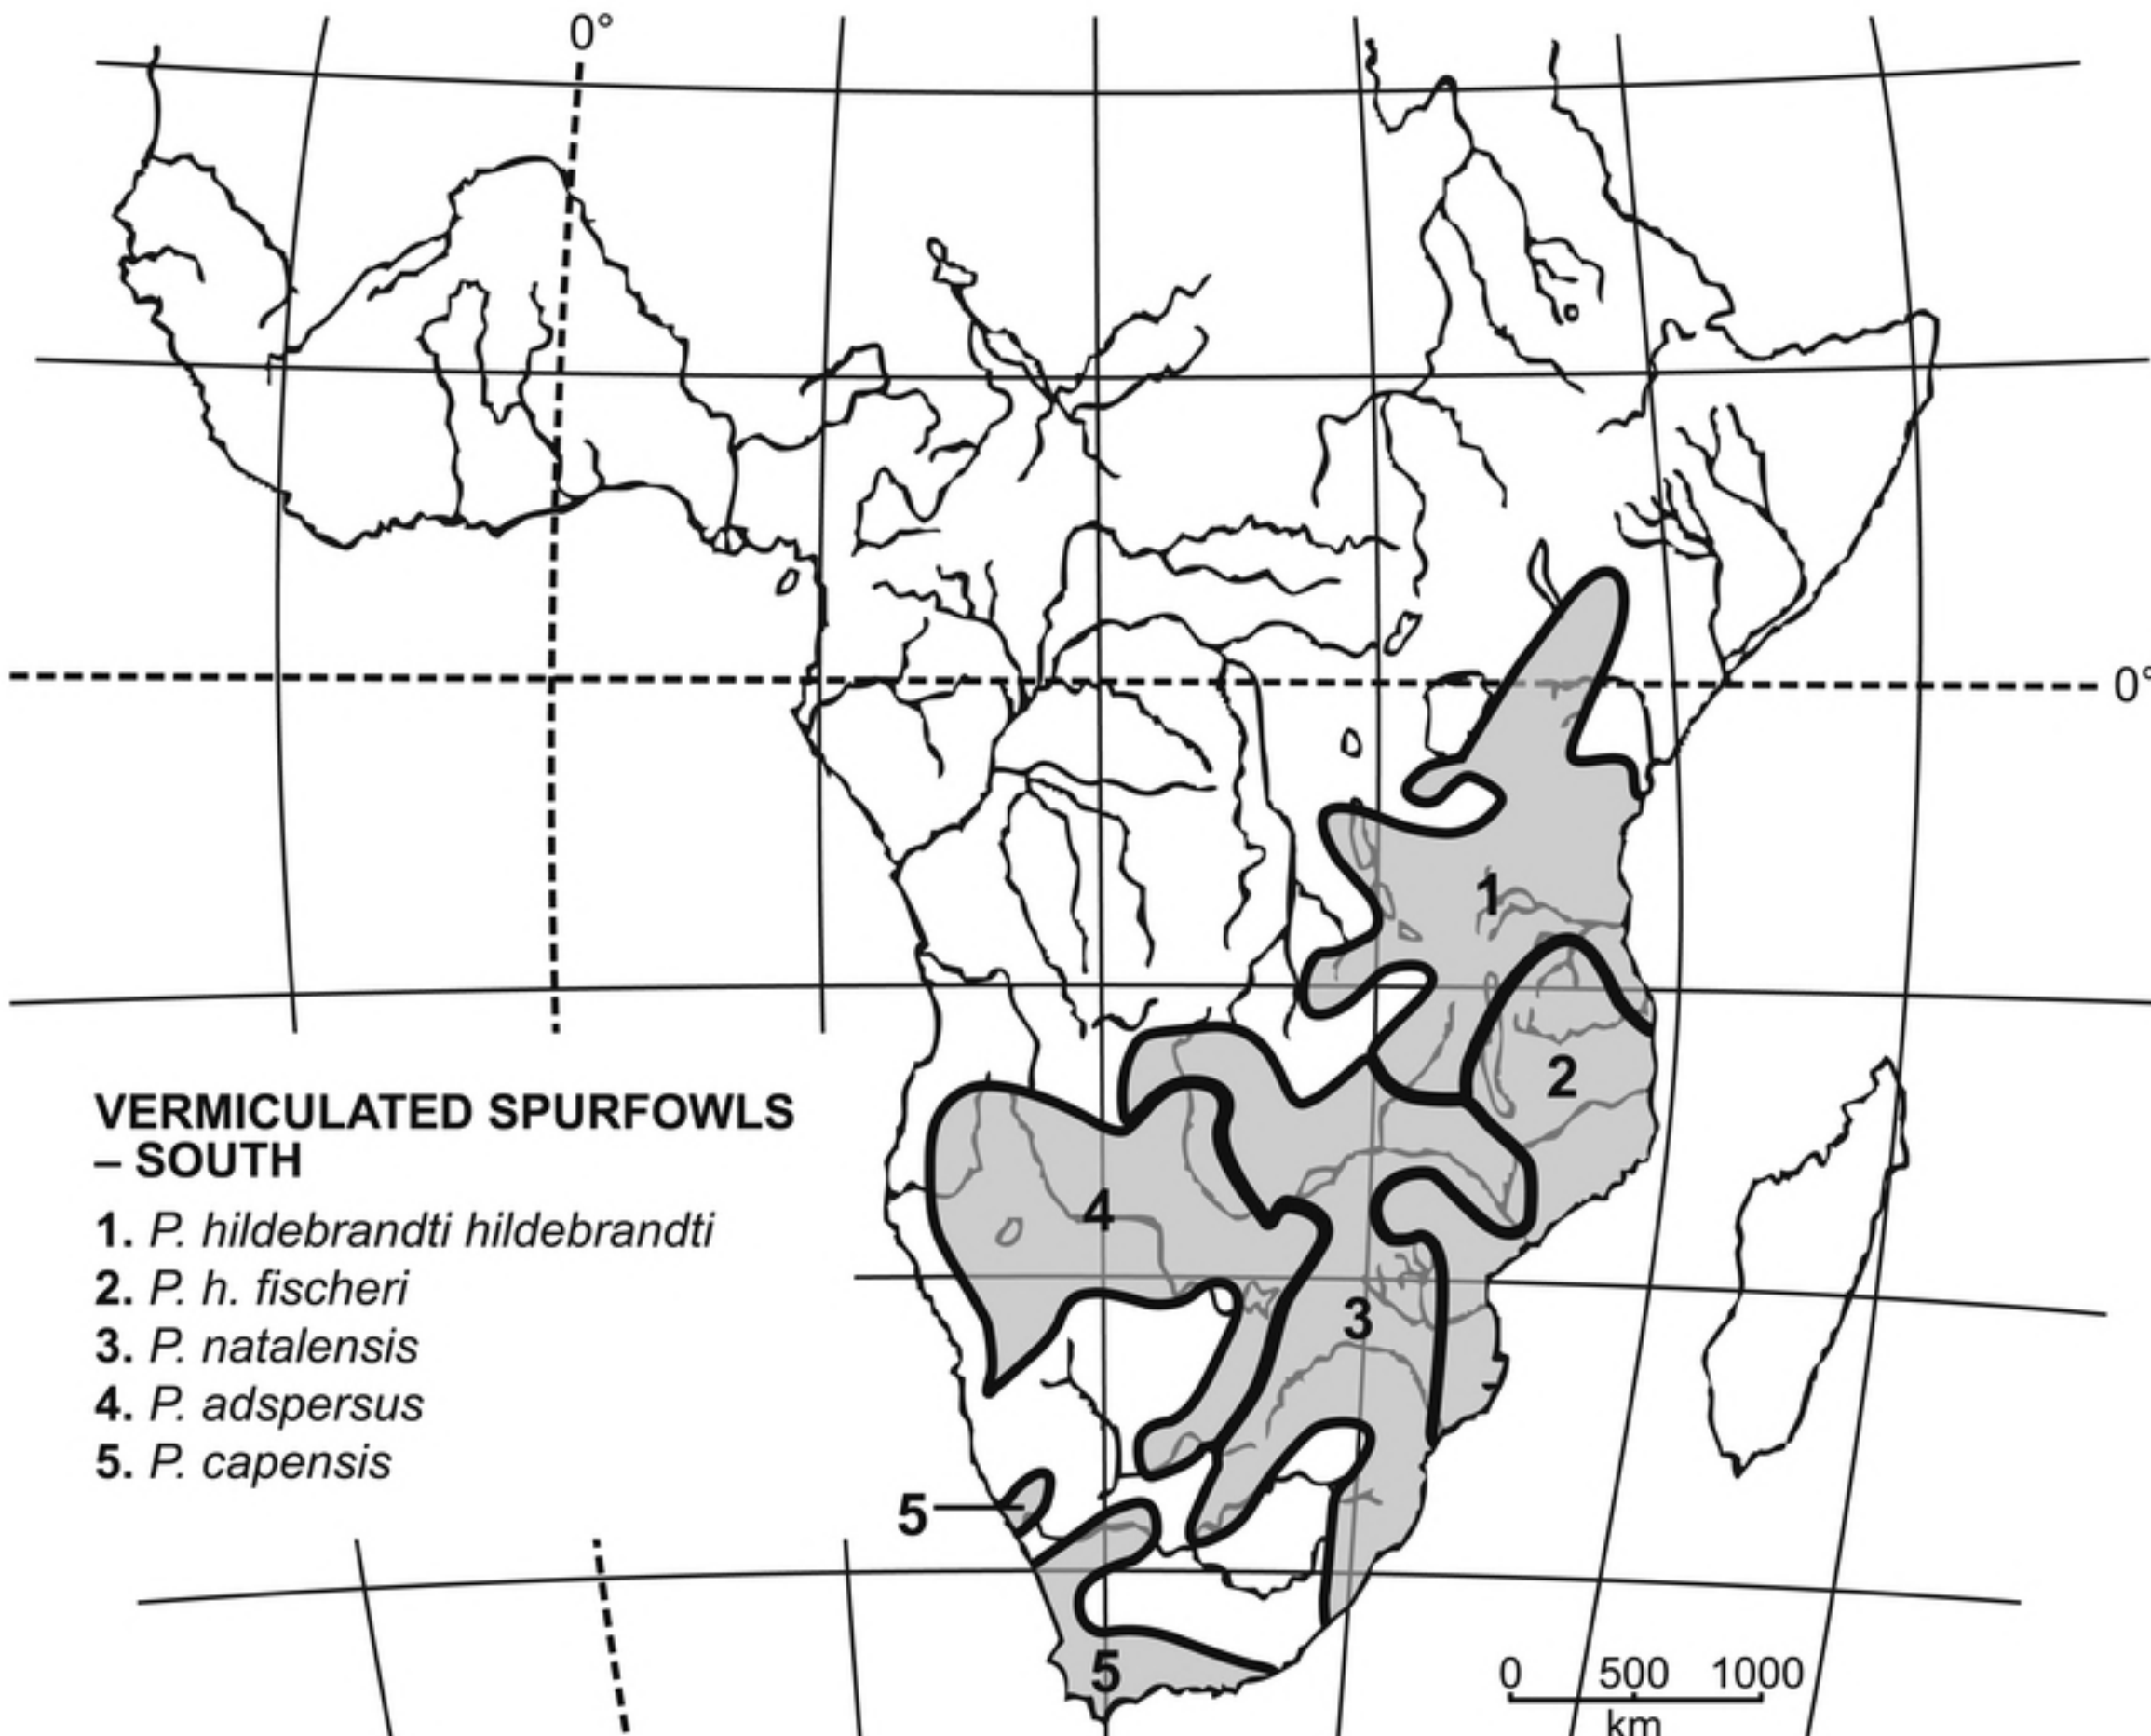

**VERMICULATED SPURFOWLS  
– SOUTH**

- 1. *P. hildebrandti hildebrandti*
- 2. *P. h. fischeri*
- 3. *P. natalensis*
- 4. *P. adspersus*
- 5. *P. capensis*

0 500 1000  
km

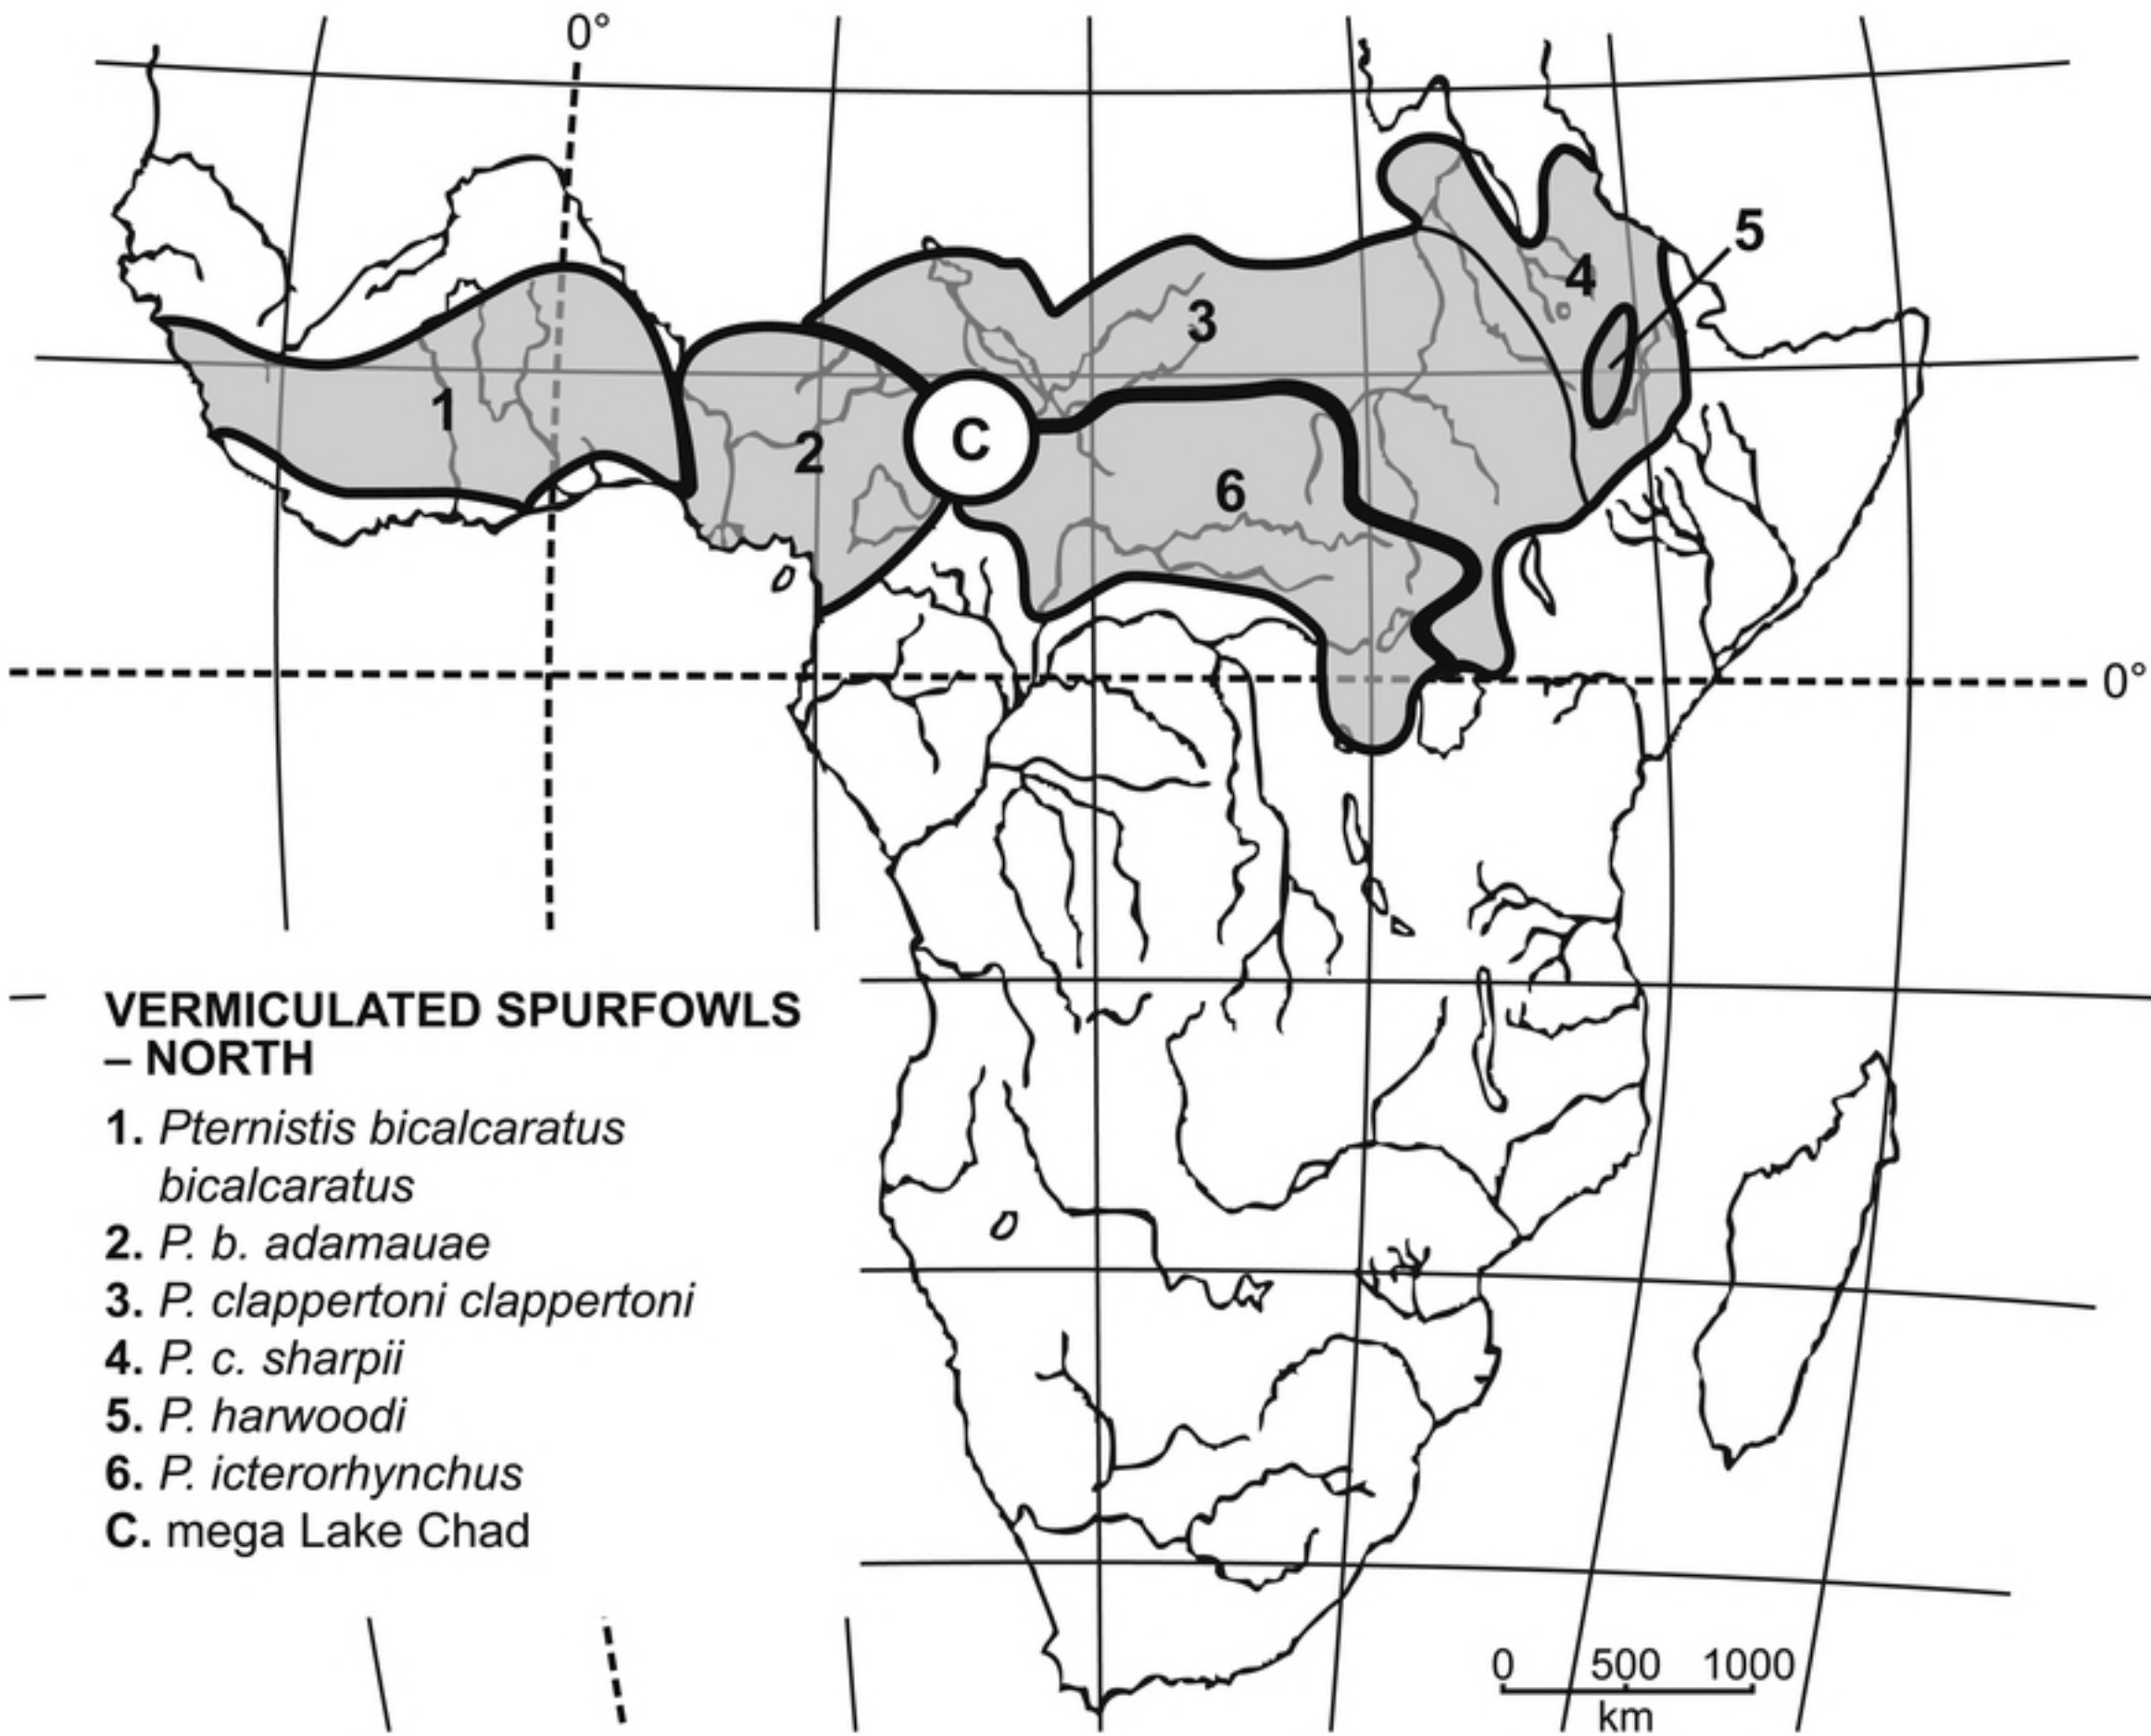

**VERMICULATED SPURFOWLS  
– NORTH**

- 1. *Pternistis bicalcaratus*  
*bicalcaratus*
- 2. *P. b. adamauae*
- 3. *P. clappertoni clappertoni*
- 4. *P. c. sharpii*
- 5. *P. harwoodi*
- 6. *P. icterorhynchus*
- C. mega Lake Chad

0 500 1000  
km

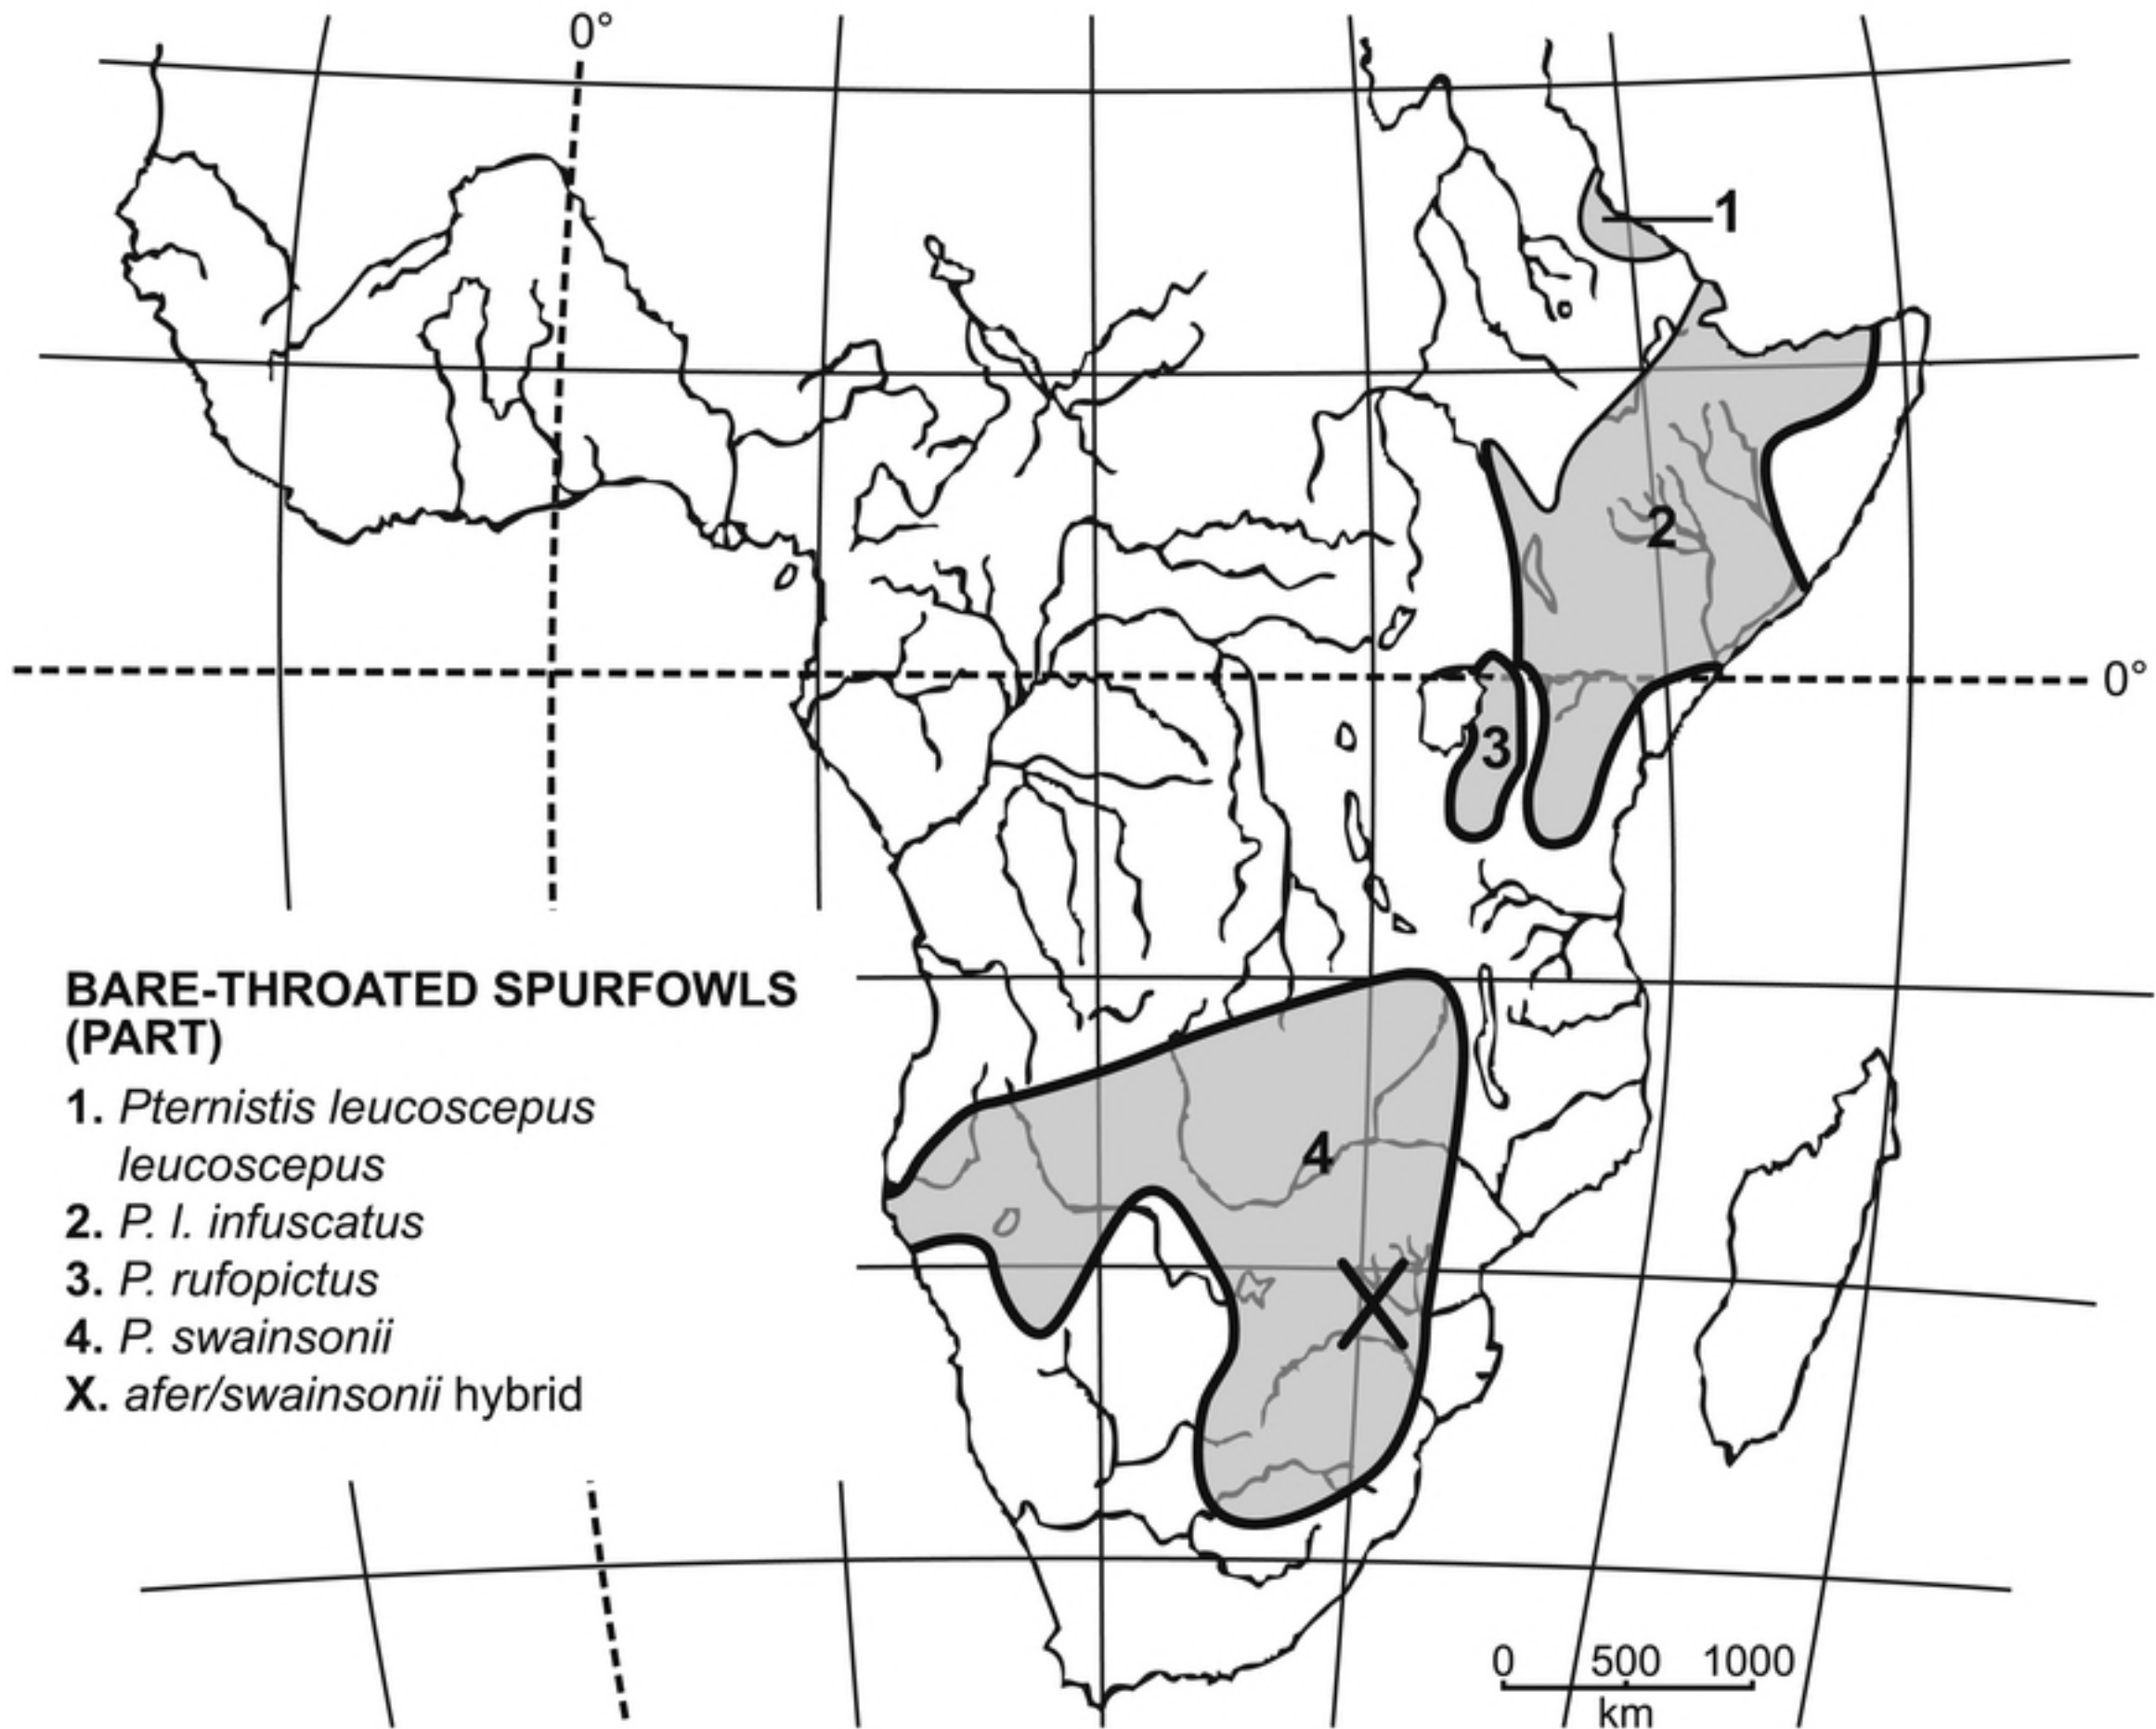

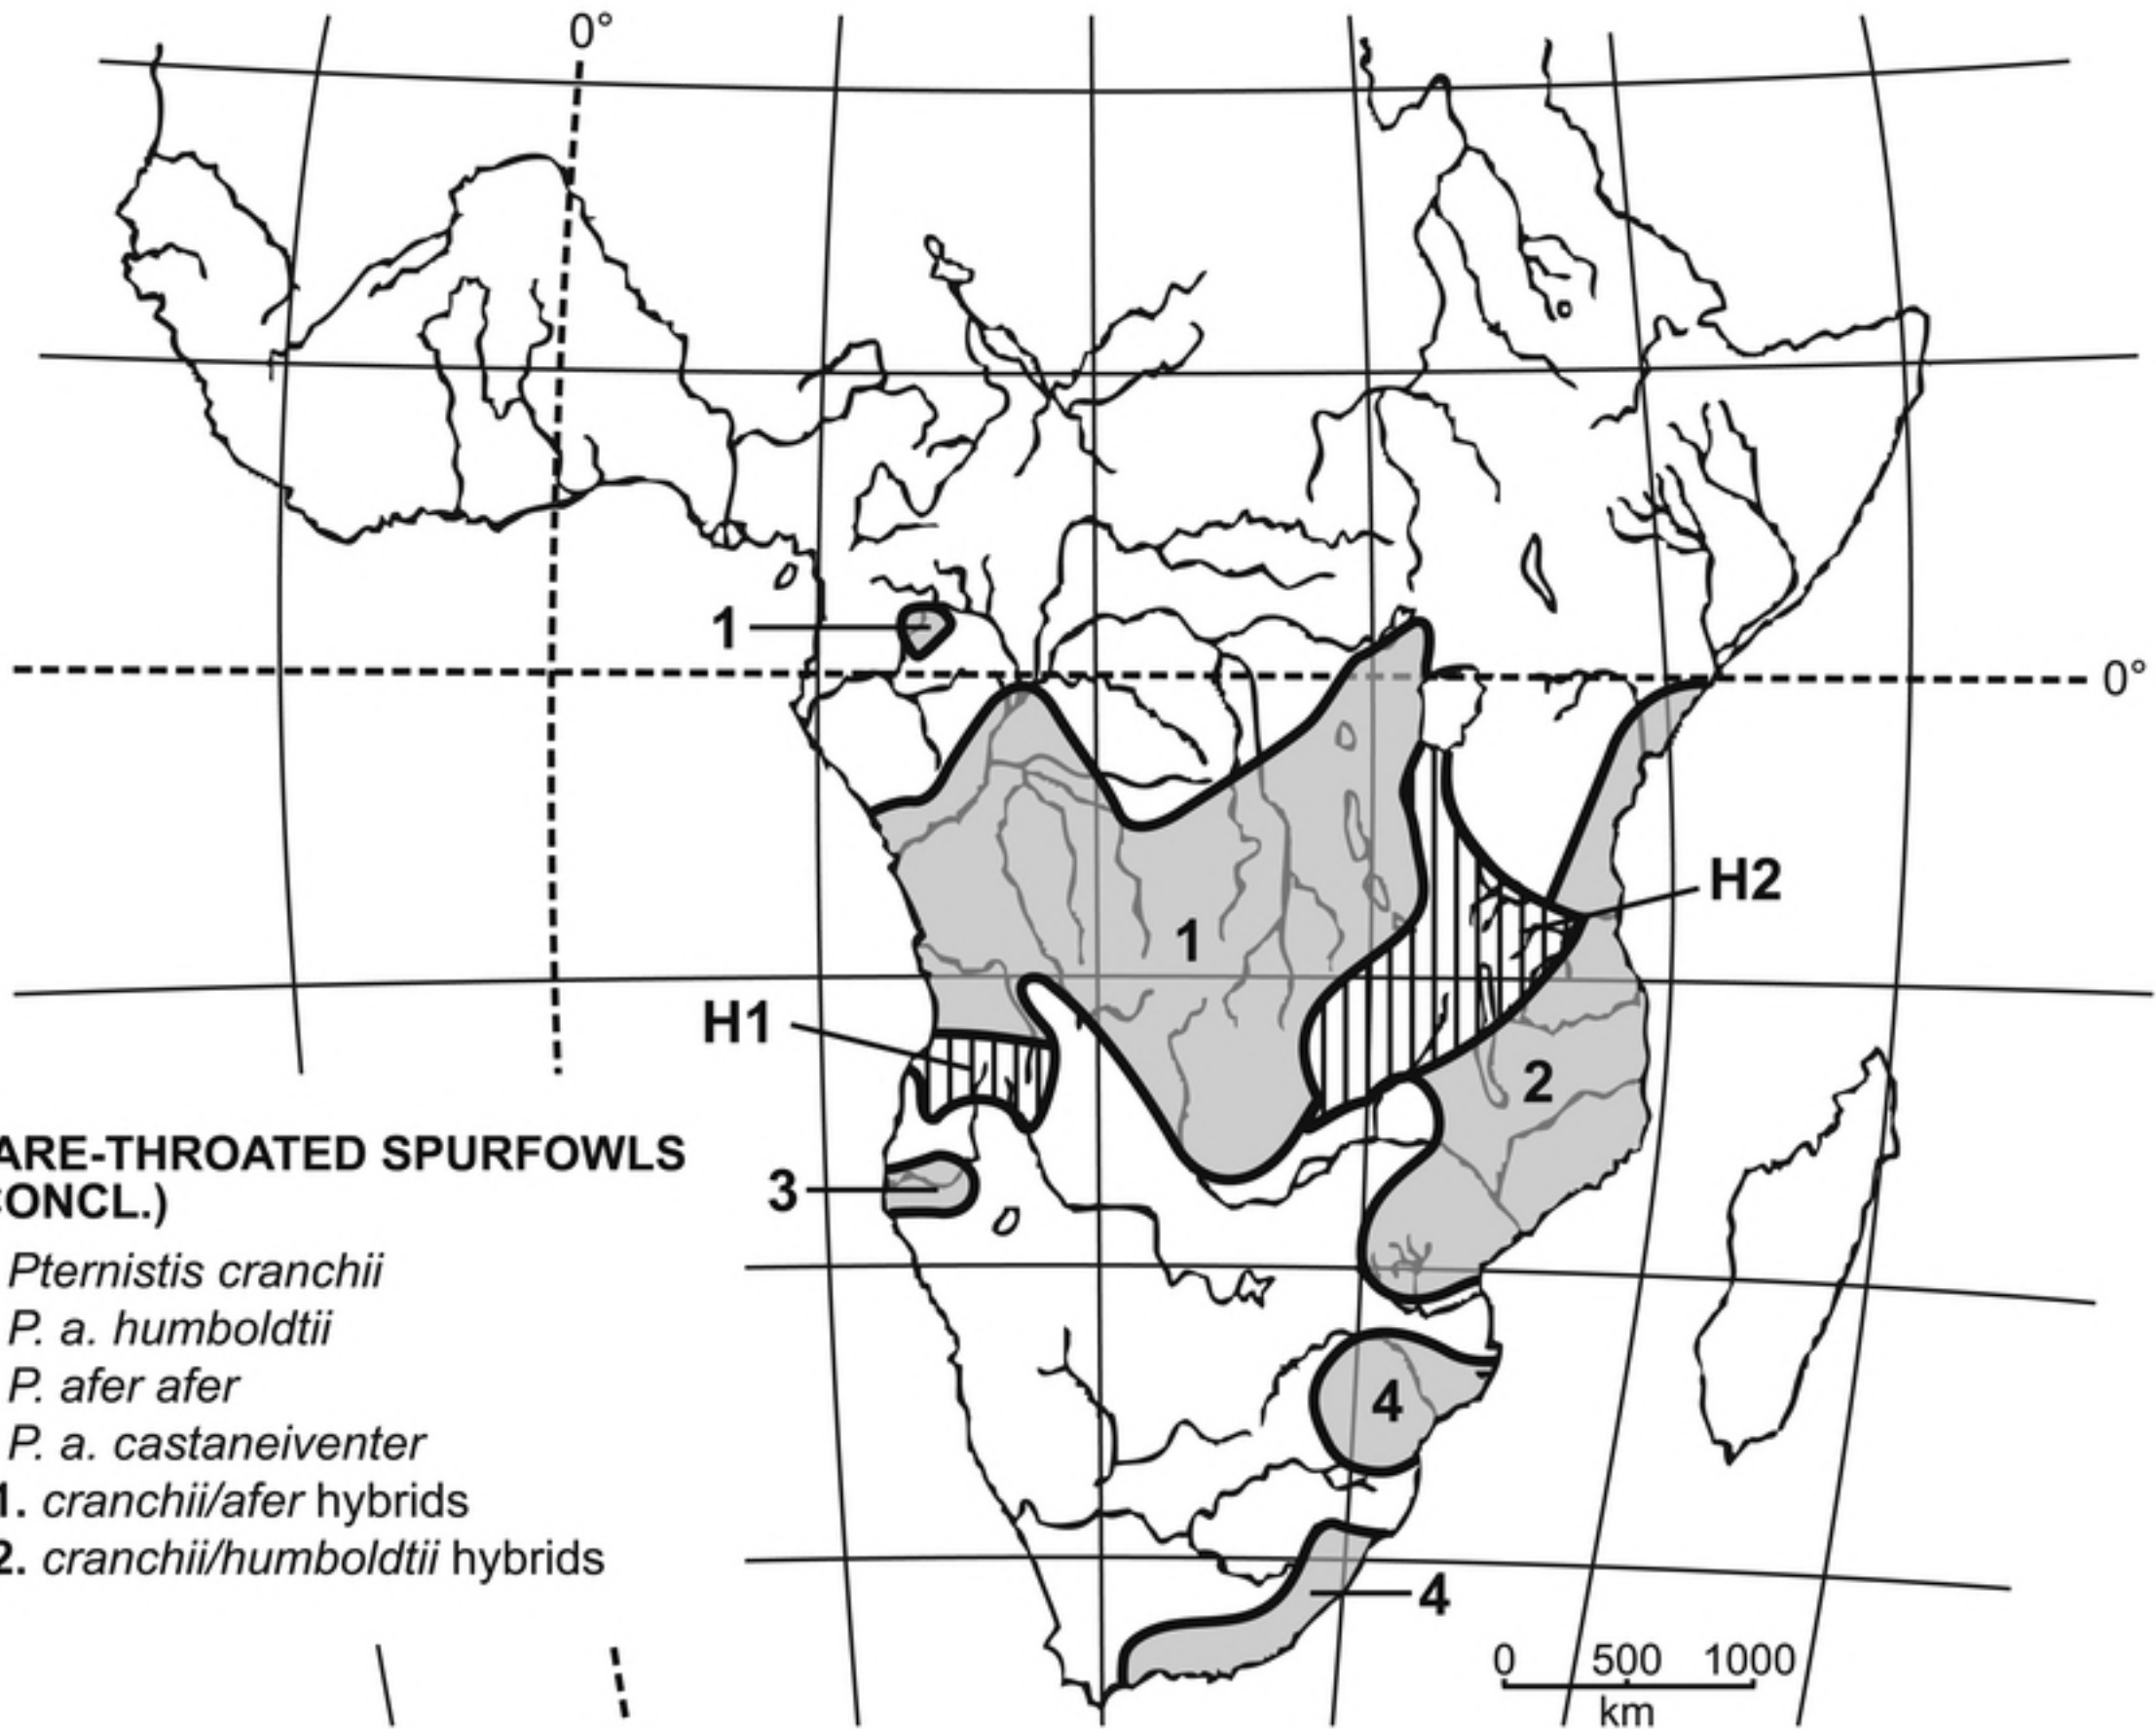

Source: https://www.biorxiv.org/content/10.1101/329243v1.full.pdf
